# Supplementary material for: Circulating miR-206 and Wnt-signaling are associated with cardiovascular complications and a history of preeclampsia in women
Source: PubMed Central journal article supplement (PMC8299351; doi:10.1042/cs20190920), 2020-01-21
Supplement: CS-2019-0920_supp.pdf [file CS-2019-0920_supp.pdf]

## Online Data Supplement for

### **Circulating miR-206 and Wnt-signaling are associated with cardiovascular complications and a history of preeclampsia in women**

**Running Title:** Circulating miRNAs in prior preeclampsia

Kenny SCHLOSSER<sup>1</sup>, Amanpreet KAUR<sup>2</sup>, Natalie DAYAN<sup>3</sup>, Duncan J STEWART\*<sup>1,4</sup>, Louise PILOTE\*<sup>2,3</sup>, Christian DELLES\*<sup>5</sup>

*\*denotes co-senior authors*

1. Sinclair Centre for Regenerative Medicine, Ottawa Hospital Research Institute, Ottawa, Ontario, Canada
2. Research Institute, McGill University Health Centre, Montreal, Quebec, Canada
3. Department of Medicine, Division of General Internal Medicine, McGill University Health Centre, Montreal, Quebec, Canada
4. Department of Cellular and Molecular Medicine, University of Ottawa, Ottawa, Ontario Canada
5. Institute of Cardiovascular and Medical Sciences, University of Glasgow, Scotland, UK

#### **Corresponding author information**

Dr. Christian Delles

Institute of Cardiovascular and Medical Sciences, University of Glasgow

126 University Place, Glasgow, G12 8TA, UK

christian.delles@glasgow.ac.uk

## **Supplementary Methods**

### **Cohort 1: ACS subjects with a history of PE or NT pregnancy**

Women with acute coronary syndrome (ACS) and a history of preeclampsia (PE) or normotensive (NT) pregnancy were identified from the GENESIS-PRAXY multicentre cohort study of adults (aged  $\leq 55$  years) hospitalized with ACS. Detailed methods have been previously described [1]. Participants were recruited between January 2009 and April 2013 from 24 centers across Canada, one in the US and one in Switzerland. All participating sites received ethics approval from their respective ethics review boards, and participants provided written informed consent. Eligible participants were adults aged 18-55 years diagnosed with ACS, and able to provide informed consent. Pregnancy data was collected by detailed self-reported questionnaires of all female participants at study entry. Women were classified as prior PE if they reported either PE or high blood pressure in addition to proteinuria. Women who were unsure about the presence or absence of a pregnancy complication or for whom completion of these questions was incomplete were excluded. The time since last pregnancy was estimated using the age of the youngest biological child, to serve as a proxy for the interval between pregnancy and incident ACS. Venipuncture was performed on all consenting participants within 24 hours of hospital admission for ACS. Whole blood collected in citrate Vacutainers was spun at 4 °C at 3000 rpm for 10 minutes and the plasma supernatant removed and frozen at -80 °C. A total of 40 subjects were initially selected for miRNA sequencing (n=20 subjects/exposure group) after matching for cardiovascular disease risk factors including hypertension, diabetes, smoking and age. The final sample size was reduced to n=17-18 subjects/exposure group after excluding plasma specimens that failed RNA- and/or library-quality control tests prior to sequencing (further details provided under quality control assays).

### **Cohort 2: non-ACS subjects with a history of PE or NT pregnancy**

Women without ACS and a history of either preeclampsia or normotensive pregnancy were identified from The Cardiovascular Consequences of Pre-eclampsia (COPS) study at the British Heart Foundation Glasgow Cardiovascular Research Centre (BHF GCRC). Women were recruited from multiple sources including the previous Generation Scotland: Scottish Family Health Study [2], the Proteomics in Pre-eclampsia study [3], patients who attended blood pressure clinics and friends and colleagues of participants who contacted us with interest in participating. The study was approved by the West of Scotland Research Ethics Committee 3 (Reference 12/WS/0306), and participants provided written informed consent. The index pregnancy was defined as the first pregnancy in normotensive women and the first pre-eclamptic pregnancy in those with pre-eclampsia. Women were excluded if they were  $>60$  years old, already had established cardiovascular disease or if they were unable to give informed consent. Participants completed a questionnaire asking for obstetric history, past medical history, drug history, smoking history and family history. Blood samples were taken from the antecubital fossa using a standard tourniquet and Vacutainer system, and centrifuged at 4 °C at 2500 rpm for 15 minutes and plasma supernatant removed and frozen -80 °C. A total of 40 subjects (n=20 subjects/exposure group) matched on hypertension, diabetes, and age were selected for miRNA sequencing. All specimens passed pre-sequencing quality control tests.

### **Cohort 3: ACS and non-ACS subjects**

The comparison of all women in cohort 1 (n=35 total ACS subjects) versus cohort 2 (n=40 total non-ACS subjects) was used to assess the impact of ACS on circulating miRNA levels.

#### **Cohort 4: Women with PE or NT pregnancy**

Information for this cohort was derived from six prior independent studies of preeclamptic women (with no ACS) reported in the systematic review by Sheikh et al. [4]. A total of 104 circulating miRNAs were identified via high-throughput screening methods as differentially altered in plasma, serum or whole blood between women with preeclampsia versus normotensive pregnancy.

#### **RNA isolation**

Total RNA including small RNAs <200 nt in size were purified from a fixed volume of 200  $\mu$ L of citrate-plasma using the miRNeasy Serum/Plasma kit (i.e., phenol/guanidine-based sample lysis and silica-column-based purification) according to manufacturer instructions (Qiagen Genomic Services; cat #217184). Cel-miR-39 was added as a spike-in control during RNA purification for downstream quality control assessment. RNA was eluted with 14  $\mu$ L of RNase-free water.

#### **RNA Quality Control**

Because the concentration of eluted total RNA purified from plasma is typically too low to assess RNA purity and integrity by standard methods involving UV absorbance ratios and Agilent Bioanalyzer, the quality of the extracted total RNA was assessed using a miScript miRNA QC PCR array (Qiagen Genomic Services; cat #MIHS-989ZE). The array contains primer assays for several types of external spike-in controls to assess variations during RNA extraction (i.e. cel-miR-39), an indicator to monitor relative efficiency and potential inhibition of the reverse transcription reaction (i.e., miRTC) and an indicator to monitor relative efficiency and potential inhibition of the downstream PCR reaction (i.e., PPC). In addition, primer assays for several endogenous miRNAs (i.e., miR-16, miR-21 and miR-191) are included as positive controls since these miRNAs are ubiquitously expressed across many different biologic specimens including body fluids, and several endogenous small nuclear/nucleolar RNAs (i.e., SNORD61, SNORD95, and SNORD96A) are included as negative controls (or markers of cellular contamination) since these are typically expressed abundantly in cells, but poorly in body fluids. During this quality assessment, specimens from 4 subjects in cohort 1 (including 1 prior PE subject and 3 prior normotensive pregnancy subjects) showed evidence of poor RNA quality (Figure S1), and therefore were not sequenced after the corresponding sequencing libraries showed poor yields (noted below; Figure S2). One additional sample from cohort 1 (a subject with prior PE) was excluded prior to sequencing because the qPCR assay showed evidence of cellular contamination (Figure S1). Overall, the results of the quality control assays suggested that the quality and quantity of extracted RNA was generally comparable between samples, with the above noted exceptions.

#### **Library Construction, Quality Control and Sequencing**

A fixed volume of 5  $\mu$ L of the extracted total RNA was used for NGS library construction using the QIAseq miRNA library kit according to manufacturer instructions (Qiagen Genomic Services; cat #331505). In brief, specifically designed 3' and 5' adapters were sequentially ligated to mature miRNAs. The ligated miRNAs were then reverse-transcribed to generate cDNA using a reverse-transcription (RT) primer with a unique molecular index (UMI) tag. Of note, the kit is designed to minimize adapter dimers and hy4 Y RNA contamination during cDNA cleanup. The

cDNA library was then amplified via PCR (21 cycles) and subsequently purified prior to quality control assessment. Library qualification was conducted with High Sensitivity DNA chips on an Agilent Bioanalyzer 2100 instrument (or Agilent TapeStation 4200) to confirm proper library size and yield (Figure S2). In addition, library concentrations were quantified on a Qubit device using the Quant-iT dsDNA High Sensitivity Assay Kit. Libraries were pooled in equimolar ratios and quantified using qPCR. Library pools were then sequenced on an Illumina NextSeq 500 sequencer using NextSeq 500 Mid Output Reagent Cartridge v2 (75 cycles). Raw data was de-multiplexed and FASTQ data files for each sample were generated using the bcl2fastq software (Illumina Inc.), and checked for quality using the FastQC tool.

### **Sequence Trimming, UMI consolidation and read mapping**

Trimming of library and sequencing adaptors was performed after sequencing with Cutadapt (1.11), and reads were analyzed for the presence of the unique molecular index (UMI) tags that were added during library construction. On average, 22.2 million raw reads were obtained per sample, and 10.2 million reads per sample remained after excluding reads that were missing adaptors, too short (insert sequence <16 nt) or did not contain the minimal length UMI tag (i.e., 10 nt). All reads containing identical insert sequence and UMI sequence (insert-UMI pair) were collapsed into a single read (to correct for potential library amplification bias and improve miRNA quantification) and passed into the analysis pipeline. On average, 2.3 million UMI-corrected reads were obtained per sample. Bowtie2 (2.2.2) was used for mapping reads based on the criterion of having a perfect sequence match to the reference sequence. Reads were aligned to miRBase 20 and/or human GRCh37 reference genome. Conversion of raw reads to UMI-corrected mapped counts was conducted by Qiagen Genomic Services.

### **miRNA-gene target integration and Pathway Enrichment Analysis**

miRNA-gene target integration and pathway enrichment analysis were performed in Partek Genomics Suite using default settings in the miRNA integration and biological interpretation pathway analysis features. Differentially-altered miRNA candidates were combined with predicted gene targets using TargetsCan 7.2 [5] (conserved miRNA sites database; 1,468,778 records) or experimentally-validated gene targets using miRTarBase 7.0 (422 517 curated miRNA-target interactions) [6], and pathway enrichment determined with a Fisher's exact test.

### **Pre and post study sample size and power estimations**

Study sample sizes of  $n=20$ /group were estimated *a priori* to achieve 80% power to detect a >2-fold change in miRNA level with a bonferonni-adjusted alpha value of 0.0001 assuming 500 detectable miRNAs for differential analysis and a coefficient of variation (CV) of 0.47. This variation in miRNA levels was estimated using the median CV from 235 miRs previously measured by (RT)-qPCR array in a similar set of human plasma samples [7], and extrapolated into a common standard deviation assuming mean miR levels between 10-20 counts. These initial sample size calculations were performed with the online calculator at <https://www.stat.ubc.ca/~rollin/stats/ssize/n2.html>. Post hoc estimations of the dispersion in miRNA count levels from the completed sequencing experiment, and sample size-power relationships were calculated using the RNASeqSampleSize software package in R language and online interface at <http://cqs.mc.vanderbilt.edu/shiny/RnaSeqSampleSize/>. [8]

## **Statistical Analysis**

All statistical tests comparing cohort characteristics were performed in Graphpad Prism 8.0. Data normality was assessed using the D'Agostino Pearson test. Differences between exposure groups for continuous data was assessed using a Mann-Whitney or unpaired t-test, depending on data normality as appropriate. Differences in categorical variables were assessed via Fisher's exact test. Data are presented as mean  $\pm$  standard deviation (SD) unless otherwise specified.

Differential expression analysis was conducted on the subset of samples related to the specific groups being compared, using UMI-corrected miRNA counts as input into the EdgeR statistical software package (Bioconductor, <http://www.bioconductor.org/>). Data was preprocessed to exclude poorly detectable miRNAs such that the sum of the counts per million mapped reads (CPM) for each miRNA in all samples pertaining to the comparison subset were  $> 10$ . The filtered data was normalized using the trimmed mean of M-values (TMM) normalization method in EdgeR to compensate for sample specific effects related to variations in sequencing depth and RNA composition. MiRNA levels in some figures are presented simply as counts per million mapped reads (CPM), which only corrects for differences in sequencing depth between samples. P-values and Benjamini-Hochberg false discovery rate (FDR)-correct p values for differentially altered miRNAs were calculated with an exact test assuming a negative binomial distribution in EdgeR. Principal component analysis and unsupervised hierarchical clustering and heatmap construction was performed with default parameters in Partek Genomics Suite 7.2 using log<sub>2</sub> transformed TMM-normalized miRNA counts (with offset 1 to account for 0 values).

**Table S1. Differential expression analysis of 427 miRNAs detected in plasma from women with acute coronary syndrome (cohort 1) and a history of preeclampsia (PE, n=18) versus normotensive (NT, n=17) pregnancy.** MiRNA levels are expressed as mean counts per million mapped reads (CPM). MiRNAs are listed in descending order of statistical significance.

| miRNA        | Fold Change (PE/NT) | p value  | FDR-adjusted p value | miR level (CPM) |
|--------------|---------------------|----------|----------------------|-----------------|
| miR-206      | -10.6               | 1.64E-06 | 6.98E-04             | 242             |
| miR-1292-5p  | -3.6                | 8.28E-05 | 1.77E-02             | 8               |
| miR-184      | 10.3                | 2.35E-04 | 3.35E-02             | 52              |
| miR-376a-3p  | -4.7                | 1.10E-03 | 1.17E-01             | 7               |
| miR-499a-5p  | 5.8                 | 1.85E-03 | 1.58E-01             | 45              |
| miR-218-5p   | 5.4                 | 2.24E-03 | 1.60E-01             | 7               |
| miR-6730-3p  | 7.3                 | 3.46E-03 | 1.96E-01             | 4               |
| miR-1299     | 4.9                 | 3.67E-03 | 1.96E-01             | 23              |
| miR-1        | 3.0                 | 5.46E-03 | 2.59E-01             | 531             |
| miR-889-3p   | -2.9                | 7.52E-03 | 3.21E-01             | 17              |
| miR-30b-5p   | -1.8                | 1.23E-02 | 4.45E-01             | 15              |
| miR-4662a-5p | 3.5                 | 1.33E-02 | 4.45E-01             | 5               |
| miR-136-3p   | -2.7                | 1.35E-02 | 4.45E-01             | 10              |
| miR-431-5p   | -2.4                | 1.47E-02 | 4.49E-01             | 73              |
| miR-874-5p   | 3.3                 | 1.64E-02 | 4.54E-01             | 4               |
| miR-28-5p    | -2.7                | 1.70E-02 | 4.54E-01             | 5               |
| miR-6767-5p  | 2.7                 | 1.95E-02 | 4.91E-01             | 7               |
| miR-505-3p   | -1.9                | 2.22E-02 | 5.01E-01             | 9               |
| miR-493-5p   | -2.3                | 2.29E-02 | 5.01E-01             | 13              |
| miR-1277-5p  | -1.8                | 2.35E-02 | 5.01E-01             | 13              |
| miR-369-5p   | -2.2                | 2.54E-02 | 5.07E-01             | 18              |
| miR-6741-3p  | 1.7                 | 2.61E-02 | 5.07E-01             | 11              |
| miR-133a-3p  | 2.7                 | 2.78E-02 | 5.16E-01             | 76              |
| miR-221-5p   | -1.9                | 3.03E-02 | 5.39E-01             | 9               |
| miR-2355-3p  | -1.9                | 3.54E-02 | 5.91E-01             | 7               |
| miR-4667-5p  | 3.6                 | 3.60E-02 | 5.91E-01             | 4               |
| miR-3591-5p  | 3.8                 | 4.01E-02 | 6.34E-01             | 5               |
| miR-769-5p   | -1.5                | 4.20E-02 | 6.40E-01             | 27              |
| miR-329-3p   | -2.5                | 4.56E-02 | 6.54E-01             | 7               |
| miR-202-3p   | 2.9                 | 4.68E-02 | 6.54E-01             | 6               |
| miR-130b-3p  | 1.5                 | 5.16E-02 | 6.54E-01             | 47              |
| miR-27a-5p   | 2.0                 | 5.32E-02 | 6.54E-01             | 5               |
| miR-335-3p   | -1.9                | 5.48E-02 | 6.54E-01             | 15              |

|              |      |          |          |       |
|--------------|------|----------|----------|-------|
| miR-195-5p   | 1.5  | 5.51E-02 | 6.54E-01 | 99    |
| miR-378c     | 1.6  | 5.79E-02 | 6.54E-01 | 15    |
| miR-5189-3p  | 2.3  | 5.89E-02 | 6.54E-01 | 6     |
| miR-378a-3p  | 1.4  | 6.01E-02 | 6.54E-01 | 465   |
| miR-150-3p   | 1.6  | 6.19E-02 | 6.54E-01 | 21    |
| miR-493-3p   | -2.1 | 6.62E-02 | 6.54E-01 | 9     |
| miR-128-3p   | -1.3 | 6.67E-02 | 6.54E-01 | 324   |
| miR-29c-3p   | 1.3  | 6.82E-02 | 6.54E-01 | 1241  |
| miR-339-5p   | -1.4 | 6.95E-02 | 6.54E-01 | 117   |
| miR-10b-3p   | 2.0  | 7.25E-02 | 6.54E-01 | 9     |
| miR-432-5p   | -1.8 | 7.28E-02 | 6.54E-01 | 434   |
| miR-628-3p   | -1.4 | 7.42E-02 | 6.54E-01 | 61    |
| miR-223-3p   | -1.5 | 7.50E-02 | 6.54E-01 | 5871  |
| miR-369-3p   | -1.8 | 7.55E-02 | 6.54E-01 | 19    |
| miR-6859-5p  | 2.0  | 7.63E-02 | 6.54E-01 | 5     |
| miR-423-3p   | -1.4 | 7.72E-02 | 6.54E-01 | 553   |
| miR-4775     | -2.4 | 7.99E-02 | 6.54E-01 | 4     |
| miR-381-3p   | -2.0 | 8.08E-02 | 6.54E-01 | 34    |
| miR-548a-3p  | -2.0 | 8.14E-02 | 6.54E-01 | 6     |
| miR-335-5p   | 1.5  | 8.34E-02 | 6.54E-01 | 397   |
| miR-3127-5p  | 1.9  | 8.73E-02 | 6.54E-01 | 8     |
| miR-382-5p   | -1.8 | 9.17E-02 | 6.54E-01 | 262   |
| miR-5187-5p  | -1.8 | 9.32E-02 | 6.54E-01 | 8     |
| miR-3688-3p  | -1.5 | 9.64E-02 | 6.54E-01 | 14    |
| miR-181c-3p  | -2.0 | 9.78E-02 | 6.54E-01 | 7     |
| miR-4714-3p  | 2.4  | 9.79E-02 | 6.54E-01 | 5     |
| miR-9-5p     | -2.4 | 9.89E-02 | 6.54E-01 | 12    |
| miR-26b-3p   | 1.7  | 9.90E-02 | 6.54E-01 | 9     |
| miR-4433b-5p | -1.7 | 1.00E-01 | 6.54E-01 | 955   |
| miR-205-5p   | -1.5 | 1.03E-01 | 6.54E-01 | 90    |
| miR-1250-5p  | 2.6  | 1.03E-01 | 6.54E-01 | 4     |
| miR-491-5p   | -1.7 | 1.05E-01 | 6.54E-01 | 12    |
| miR-18a-3p   | -1.4 | 1.07E-01 | 6.54E-01 | 39    |
| miR-143-5p   | 1.7  | 1.09E-01 | 6.54E-01 | 16    |
| miR-664b-5p  | 1.5  | 1.09E-01 | 6.54E-01 | 12    |
| miR-654-3p   | -1.8 | 1.11E-01 | 6.54E-01 | 42    |
| miR-208b-3p  | 2.5  | 1.12E-01 | 6.54E-01 | 88    |
| miR-30d-5p   | -1.2 | 1.12E-01 | 6.54E-01 | 12944 |
| miR-376c-3p  | -2.2 | 1.14E-01 | 6.54E-01 | 7     |
| miR-4669     | -2.3 | 1.15E-01 | 6.54E-01 | 9     |
| miR-1304-3p  | -1.5 | 1.15E-01 | 6.54E-01 | 14    |

|               |      |          |          |      |
|---------------|------|----------|----------|------|
| miR-652-3p    | -1.4 | 1.16E-01 | 6.54E-01 | 36   |
| miR-125b-1-3p | 2.1  | 1.17E-01 | 6.54E-01 | 8    |
| miR-574-3p    | 1.5  | 1.19E-01 | 6.54E-01 | 74   |
| miR-3679-5p   | 1.9  | 1.20E-01 | 6.54E-01 | 8    |
| miR-3613-3p   | -1.8 | 1.21E-01 | 6.54E-01 | 6    |
| miR-323a-3p   | -1.7 | 1.26E-01 | 6.56E-01 | 21   |
| miR-379-5p    | -1.7 | 1.26E-01 | 6.56E-01 | 53   |
| miR-885-5p    | -1.8 | 1.28E-01 | 6.56E-01 | 18   |
| miR-361-3p    | -1.3 | 1.28E-01 | 6.56E-01 | 351  |
| miR-145-3p    | 2.2  | 1.31E-01 | 6.56E-01 | 6    |
| miR-127-3p    | -1.9 | 1.34E-01 | 6.56E-01 | 10   |
| miR-4738-3p   | 1.9  | 1.36E-01 | 6.56E-01 | 6    |
| miR-6721-5p   | -1.7 | 1.36E-01 | 6.56E-01 | 7    |
| miR-3168      | 1.6  | 1.38E-01 | 6.56E-01 | 36   |
| miR-1237-3p   | -1.7 | 1.38E-01 | 6.56E-01 | 7    |
| miR-296-5p    | 1.4  | 1.38E-01 | 6.56E-01 | 22   |
| miR-452-5p    | 1.8  | 1.44E-01 | 6.69E-01 | 12   |
| miR-338-3p    | -1.5 | 1.45E-01 | 6.69E-01 | 17   |
| miR-576-5p    | -1.3 | 1.46E-01 | 6.69E-01 | 171  |
| miR-1301-3p   | -1.5 | 1.47E-01 | 6.69E-01 | 26   |
| miR-339-3p    | -1.3 | 1.57E-01 | 6.97E-01 | 38   |
| miR-1307-3p   | -1.3 | 1.62E-01 | 6.97E-01 | 734  |
| miR-17-5p     | -1.3 | 1.64E-01 | 6.97E-01 | 117  |
| let-7d-5p     | 1.2  | 1.64E-01 | 6.97E-01 | 1828 |
| miR-425-5p    | -1.2 | 1.64E-01 | 6.97E-01 | 4293 |
| miR-23a-5p    | 1.9  | 1.65E-01 | 6.97E-01 | 4    |
| miR-27a-3p    | 1.2  | 1.66E-01 | 6.97E-01 | 201  |
| miR-1273h-3p  | -1.6 | 1.67E-01 | 6.97E-01 | 10   |
| miR-196a-5p   | -1.7 | 1.75E-01 | 7.14E-01 | 16   |
| miR-151a-3p   | -1.3 | 1.76E-01 | 7.14E-01 | 2003 |
| miR-548n      | -1.7 | 1.76E-01 | 7.14E-01 | 6    |
| miR-106b-5p   | -1.4 | 1.77E-01 | 7.14E-01 | 25   |
| miR-4732-3p   | -1.3 | 1.84E-01 | 7.21E-01 | 208  |
| miR-29b-3p    | 1.2  | 1.85E-01 | 7.21E-01 | 152  |
| miR-126-3p    | -1.2 | 1.88E-01 | 7.21E-01 | 9787 |
| miR-93-3p     | -1.3 | 1.88E-01 | 7.21E-01 | 32   |
| miR-30a-3p    | 1.3  | 1.92E-01 | 7.21E-01 | 58   |
| miR-323b-3p   | -1.6 | 1.93E-01 | 7.21E-01 | 31   |
| miR-382-3p    | -1.7 | 1.94E-01 | 7.21E-01 | 13   |
| miR-1255b-5p  | -1.3 | 1.94E-01 | 7.21E-01 | 45   |
| miR-95-3p     | 1.5  | 1.96E-01 | 7.21E-01 | 18   |



|             |      |          |          |      |
|-------------|------|----------|----------|------|
| miR-425-3p  | -1.2 | 1.97E-01 | 7.21E-01 | 75   |
| miR-409-3p  | -1.6 | 1.98E-01 | 7.21E-01 | 346  |
| miR-208a-3p | 2.1  | 1.99E-01 | 7.21E-01 | 5    |
| miR-22-5p   | -1.5 | 2.01E-01 | 7.23E-01 | 10   |
| miR-199a-5p | -1.5 | 2.07E-01 | 7.31E-01 | 17   |
| miR-30a-5p  | 1.3  | 2.07E-01 | 7.31E-01 | 1276 |
| miR-485-5p  | -1.5 | 2.13E-01 | 7.41E-01 | 41   |
| miR-144-5p  | -1.3 | 2.13E-01 | 7.41E-01 | 197  |
| miR-30d-3p  | 1.7  | 2.16E-01 | 7.41E-01 | 6    |
| miR-215-5p  | 1.6  | 2.19E-01 | 7.41E-01 | 82   |
| miR-411-5p  | -1.6 | 2.20E-01 | 7.41E-01 | 13   |
| miR-222-3p  | 1.2  | 2.20E-01 | 7.41E-01 | 113  |
| miR-129-5p  | -1.5 | 2.26E-01 | 7.52E-01 | 7    |
| miR-132-3p  | 1.3  | 2.27E-01 | 7.52E-01 | 46   |
| miR-671-5p  | -1.3 | 2.32E-01 | 7.59E-01 | 57   |
| miR-10b-5p  | 1.3  | 2.33E-01 | 7.59E-01 | 1401 |
| miR-29a-3p  | 1.2  | 2.36E-01 | 7.59E-01 | 1092 |
| miR-1226-3p | -1.3 | 2.38E-01 | 7.59E-01 | 10   |
| miR-548l    | -1.3 | 2.40E-01 | 7.59E-01 | 9    |
| miR-485-3p  | -1.6 | 2.41E-01 | 7.59E-01 | 70   |
| miR-7976    | -1.4 | 2.42E-01 | 7.59E-01 | 9    |
| miR-4710    | 2.1  | 2.47E-01 | 7.69E-01 | 4    |
| miR-15a-5p  | 1.2  | 2.58E-01 | 7.98E-01 | 599  |
| miR-21-3p   | -1.3 | 2.61E-01 | 8.03E-01 | 10   |
| miR-23b-3p  | 1.2  | 2.64E-01 | 8.06E-01 | 154  |
| miR-148a-3p | -1.2 | 2.67E-01 | 8.08E-01 | 3832 |
| miR-200b-3p | -1.6 | 2.71E-01 | 8.15E-01 | 34   |
| miR-340-5p  | -1.2 | 2.82E-01 | 8.40E-01 | 173  |
| miR-625-5p  | -1.4 | 2.84E-01 | 8.40E-01 | 8    |
| miR-625-3p  | -1.3 | 2.85E-01 | 8.40E-01 | 321  |
| miR-584-5p  | -1.2 | 2.94E-01 | 8.54E-01 | 723  |
| miR-494-3p  | 1.5  | 2.95E-01 | 8.54E-01 | 12   |
| miR-23b-5p  | 1.5  | 2.97E-01 | 8.54E-01 | 9    |
| miR-377-3p  | -1.4 | 3.02E-01 | 8.54E-01 | 6    |
| miR-1468-5p | -1.3 | 3.07E-01 | 8.54E-01 | 9    |
| miR-15b-5p  | 1.2  | 3.08E-01 | 8.54E-01 | 672  |
| miR-3942-5p | -1.5 | 3.09E-01 | 8.54E-01 | 4    |
| miR-421     | 1.2  | 3.09E-01 | 8.54E-01 | 47   |
| miR-191-3p  | -1.3 | 3.09E-01 | 8.54E-01 | 13   |
| miR-107     | 1.2  | 3.12E-01 | 8.54E-01 | 414  |
| miR-3187-3p | 1.3  | 3.12E-01 | 8.54E-01 | 25   |

|              |      |          |          |      |
|--------------|------|----------|----------|------|
| miR-628-5p   | -1.5 | 3.15E-01 | 8.57E-01 | 13   |
| miR-33a-5p   | 1.3  | 3.19E-01 | 8.61E-01 | 9    |
| miR-548d-5p  | 1.3  | 3.25E-01 | 8.68E-01 | 16   |
| miR-5583-3p  | -1.7 | 3.25E-01 | 8.68E-01 | 5    |
| miR-106b-3p  | -1.2 | 3.32E-01 | 8.77E-01 | 575  |
| miR-548j-5p  | -1.3 | 3.33E-01 | 8.77E-01 | 31   |
| miR-4433b-3p | 1.7  | 3.40E-01 | 8.90E-01 | 16   |
| miR-24-3p    | -1.1 | 3.42E-01 | 8.90E-01 | 583  |
| let-7e-5p    | 1.1  | 3.44E-01 | 8.91E-01 | 214  |
| miR-214-3p   | 1.6  | 3.49E-01 | 8.93E-01 | 7    |
| miR-151a-5p  | -1.2 | 3.52E-01 | 8.93E-01 | 20   |
| miR-636      | -1.2 | 3.56E-01 | 8.93E-01 | 16   |
| miR-181a-5p  | -1.2 | 3.56E-01 | 8.93E-01 | 1338 |
| miR-3605-5p  | 1.3  | 3.63E-01 | 8.93E-01 | 8    |
| miR-3065-5p  | 1.4  | 3.63E-01 | 8.93E-01 | 9    |
| miR-1908-5p  | -1.2 | 3.66E-01 | 8.93E-01 | 49   |
| miR-197-3p   | -1.2 | 3.67E-01 | 8.93E-01 | 243  |
| miR-374a-5p  | -1.2 | 3.67E-01 | 8.93E-01 | 86   |
| miR-671-3p   | -1.3 | 3.68E-01 | 8.93E-01 | 16   |
| miR-1976     | -1.2 | 3.69E-01 | 8.93E-01 | 42   |
| miR-3615     | -1.2 | 3.70E-01 | 8.93E-01 | 744  |
| miR-542-3p   | -1.2 | 3.73E-01 | 8.94E-01 | 20   |
| miR-337-5p   | -1.4 | 3.78E-01 | 9.01E-01 | 5    |
| miR-409-5p   | -1.6 | 3.80E-01 | 9.01E-01 | 5    |
| miR-199a-3p  | -1.2 | 3.88E-01 | 9.13E-01 | 1591 |
| miR-190a-5p  | 1.2  | 3.94E-01 | 9.13E-01 | 95   |
| miR-34a-5p   | 1.3  | 3.96E-01 | 9.13E-01 | 56   |
| miR-134-5p   | -1.3 | 3.97E-01 | 9.13E-01 | 152  |
| miR-3158-3p  | -1.3 | 3.98E-01 | 9.13E-01 | 15   |
| miR-664a-3p  | -1.3 | 3.99E-01 | 9.13E-01 | 9    |
| miR-146b-5p  | -1.2 | 4.04E-01 | 9.13E-01 | 335  |
| miR-509-3p   | 1.6  | 4.05E-01 | 9.13E-01 | 5    |
| miR-6514-5p  | -1.4 | 4.07E-01 | 9.13E-01 | 6    |
| miR-370-3p   | -1.4 | 4.08E-01 | 9.13E-01 | 32   |
| miR-5010-5p  | -1.2 | 4.10E-01 | 9.13E-01 | 8    |
| miR-19a-3p   | 1.1  | 4.12E-01 | 9.13E-01 | 140  |
| miR-181d-5p  | -1.3 | 4.13E-01 | 9.13E-01 | 14   |
| miR-454-3p   | 1.2  | 4.17E-01 | 9.16E-01 | 90   |
| miR-342-3p   | -1.1 | 4.19E-01 | 9.16E-01 | 3341 |
| miR-140-3p   | 1.2  | 4.21E-01 | 9.16E-01 | 963  |
| miR-6515-3p  | -1.3 | 4.23E-01 | 9.16E-01 | 5    |

|               |      |          |          |        |
|---------------|------|----------|----------|--------|
| miR-487b-3p   | -1.4 | 4.26E-01 | 9.16E-01 | 8      |
| miR-589-5p    | -1.2 | 4.27E-01 | 9.16E-01 | 21     |
| miR-92a-3p    | -1.1 | 4.30E-01 | 9.19E-01 | 127379 |
| miR-328-3p    | -1.2 | 4.34E-01 | 9.21E-01 | 648    |
| miR-199b-3p   | -1.2 | 4.39E-01 | 9.26E-01 | 1256   |
| miR-100-5p    | -1.2 | 4.40E-01 | 9.26E-01 | 201    |
| miR-484       | -1.2 | 4.48E-01 | 9.37E-01 | 2247   |
| miR-143-3p    | 1.2  | 4.50E-01 | 9.38E-01 | 1510   |
| miR-125b-2-3p | 1.3  | 4.54E-01 | 9.38E-01 | 18     |
| miR-3940-3p   | -1.3 | 4.58E-01 | 9.38E-01 | 7      |
| miR-6852-5p   | -1.3 | 4.58E-01 | 9.38E-01 | 22     |
| miR-345-5p    | -1.2 | 4.66E-01 | 9.38E-01 | 28     |
| miR-25-5p     | 1.2  | 4.66E-01 | 9.38E-01 | 40     |
| miR-125a-3p   | 1.5  | 4.67E-01 | 9.38E-01 | 6      |
| miR-6793-5p   | -1.2 | 4.67E-01 | 9.38E-01 | 5      |
| miR-497-5p    | 1.4  | 4.68E-01 | 9.38E-01 | 8      |
| miR-1224-5p   | 1.2  | 4.73E-01 | 9.40E-01 | 10     |
| miR-3177-3p   | -1.3 | 4.74E-01 | 9.40E-01 | 8      |
| miR-4435      | 1.5  | 4.75E-01 | 9.40E-01 | 5      |
| miR-326       | -1.3 | 4.78E-01 | 9.40E-01 | 24     |
| miR-22-3p     | 1.1  | 4.91E-01 | 9.49E-01 | 685    |
| miR-3613-5p   | 1.1  | 4.92E-01 | 9.49E-01 | 381    |
| miR-744-5p    | -1.2 | 4.97E-01 | 9.49E-01 | 254    |
| miR-99b-5p    | -1.1 | 4.98E-01 | 9.49E-01 | 297    |
| miR-223-5p    | -1.1 | 5.01E-01 | 9.49E-01 | 349    |
| miR-122-3p    | -1.3 | 5.03E-01 | 9.49E-01 | 6      |
| miR-4732-5p   | 1.1  | 5.05E-01 | 9.49E-01 | 260    |
| miR-1247-5p   | 1.3  | 5.05E-01 | 9.49E-01 | 10     |
| miR-532-5p    | -1.1 | 5.09E-01 | 9.49E-01 | 289    |
| miR-122-5p    | -1.2 | 5.24E-01 | 9.49E-01 | 50853  |
| miR-9-3p      | 1.4  | 5.27E-01 | 9.49E-01 | 5      |
| miR-5001-3p   | -1.2 | 5.30E-01 | 9.49E-01 | 9      |
| miR-181c-5p   | -1.2 | 5.32E-01 | 9.49E-01 | 9      |
| miR-18b-3p    | -1.2 | 5.33E-01 | 9.49E-01 | 6      |
| miR-769-3p    | 1.2  | 5.33E-01 | 9.49E-01 | 7      |
| miR-660-5p    | -1.1 | 5.34E-01 | 9.49E-01 | 470    |
| miR-181b-5p   | -1.1 | 5.39E-01 | 9.49E-01 | 197    |
| miR-203a      | -1.3 | 5.41E-01 | 9.49E-01 | 272    |
| miR-148b-5p   | -1.2 | 5.45E-01 | 9.49E-01 | 13     |
| miR-30e-3p    | -1.1 | 5.46E-01 | 9.49E-01 | 112    |
| miR-155-5p    | 1.1  | 5.47E-01 | 9.49E-01 | 367    |

|               |      |          |          |       |
|---------------|------|----------|----------|-------|
| miR-210-3p    | 1.2  | 5.47E-01 | 9.49E-01 | 22    |
| miR-424-5p    | -1.2 | 5.51E-01 | 9.49E-01 | 13    |
| miR-502-3p    | 1.1  | 5.54E-01 | 9.49E-01 | 46    |
| miR-192-5p    | -1.1 | 5.61E-01 | 9.49E-01 | 972   |
| miR-324-3p    | -1.1 | 5.61E-01 | 9.49E-01 | 32    |
| miR-103a-3p   | -1.1 | 5.64E-01 | 9.49E-01 | 3992  |
| miR-6786-3p   | -1.2 | 5.64E-01 | 9.49E-01 | 7     |
| miR-651-5p    | 1.3  | 5.65E-01 | 9.49E-01 | 15    |
| let-7f-5p     | 1.1  | 5.65E-01 | 9.49E-01 | 15727 |
| miR-181a-3p   | 1.1  | 5.65E-01 | 9.49E-01 | 26    |
| miR-31-5p     | 1.4  | 5.69E-01 | 9.49E-01 | 10    |
| miR-96-5p     | 1.1  | 5.70E-01 | 9.49E-01 | 144   |
| miR-598-3p    | -1.1 | 5.72E-01 | 9.49E-01 | 37    |
| miR-320d      | -1.1 | 5.75E-01 | 9.49E-01 | 68    |
| miR-3120-3p   | -1.2 | 5.77E-01 | 9.49E-01 | 4     |
| miR-18a-5p    | -1.1 | 5.86E-01 | 9.49E-01 | 26    |
| miR-378i      | 1.2  | 5.88E-01 | 9.49E-01 | 10    |
| miR-3138      | 1.3  | 5.90E-01 | 9.49E-01 | 8     |
| miR-1260b     | -1.2 | 5.91E-01 | 9.49E-01 | 10    |
| miR-26b-5p    | -1.1 | 5.94E-01 | 9.49E-01 | 3842  |
| miR-627-5p    | -1.2 | 5.95E-01 | 9.49E-01 | 8     |
| miR-181a-2-3p | 1.1  | 5.96E-01 | 9.49E-01 | 40    |
| miR-200c-3p   | -1.2 | 5.96E-01 | 9.49E-01 | 91    |
| miR-4742-3p   | -1.1 | 5.99E-01 | 9.49E-01 | 12    |
| miR-483-5p    | 1.2  | 6.01E-01 | 9.49E-01 | 550   |
| miR-10a-5p    | 1.1  | 6.01E-01 | 9.49E-01 | 978   |
| miR-1246      | -1.1 | 6.03E-01 | 9.49E-01 | 35    |
| miR-193b-5p   | 1.2  | 6.03E-01 | 9.49E-01 | 78    |
| miR-186-5p    | -1.1 | 6.08E-01 | 9.49E-01 | 277   |
| miR-4428      | 2.3  | 6.08E-01 | 9.49E-01 | 3     |
| miR-125a-5p   | 1.1  | 6.08E-01 | 9.49E-01 | 2160  |
| miR-6807-5p   | 1.3  | 6.11E-01 | 9.49E-01 | 4     |
| miR-505-5p    | -1.2 | 6.13E-01 | 9.49E-01 | 14    |
| miR-126-5p    | 1.1  | 6.14E-01 | 9.49E-01 | 3411  |
| miR-199b-5p   | -1.2 | 6.14E-01 | 9.49E-01 | 8     |
| miR-320a      | 1.1  | 6.15E-01 | 9.49E-01 | 2154  |
| miR-1260a     | -1.2 | 6.18E-01 | 9.49E-01 | 8     |
| miR-374b-5p   | -1.1 | 6.20E-01 | 9.49E-01 | 23    |
| miR-140-5p    | -1.1 | 6.22E-01 | 9.49E-01 | 46    |
| miR-4533      | -2.0 | 6.23E-01 | 9.49E-01 | 4     |
| miR-7706      | 1.2  | 6.25E-01 | 9.49E-01 | 16    |

|              |      |          |          |       |
|--------------|------|----------|----------|-------|
| miR-664a-5p  | 1.1  | 6.27E-01 | 9.49E-01 | 128   |
| miR-629-5p   | -1.1 | 6.29E-01 | 9.49E-01 | 219   |
| miR-3605-3p  | -1.1 | 6.30E-01 | 9.49E-01 | 40    |
| let-7a-3p    | 1.2  | 6.30E-01 | 9.49E-01 | 9     |
| miR-1306-5p  | -1.1 | 6.31E-01 | 9.49E-01 | 260   |
| miR-365a-3p  | -1.2 | 6.39E-01 | 9.49E-01 | 14    |
| miR-99b-3p   | -1.2 | 6.39E-01 | 9.49E-01 | 9     |
| miR-26a-5p   | -1.1 | 6.39E-01 | 9.49E-01 | 4679  |
| miR-676-3p   | 1.5  | 6.42E-01 | 9.49E-01 | 5     |
| miR-193a-5p  | 1.1  | 6.46E-01 | 9.49E-01 | 305   |
| miR-1270     | 1.1  | 6.47E-01 | 9.49E-01 | 18    |
| let-7c-5p    | 1.1  | 6.52E-01 | 9.49E-01 | 765   |
| miR-363-3p   | -1.1 | 6.56E-01 | 9.49E-01 | 510   |
| miR-196b-5p  | -1.1 | 6.56E-01 | 9.49E-01 | 224   |
| miR-194-5p   | -1.1 | 6.61E-01 | 9.49E-01 | 461   |
| miR-7-5p     | 1.1  | 6.61E-01 | 9.49E-01 | 659   |
| miR-146b-3p  | -1.1 | 6.62E-01 | 9.49E-01 | 14    |
| miR-500a-3p  | 1.1  | 6.62E-01 | 9.49E-01 | 39    |
| miR-941      | -1.1 | 6.62E-01 | 9.49E-01 | 139   |
| miR-27b-3p   | 1.1  | 6.67E-01 | 9.51E-01 | 771   |
| miR-32-5p    | 1.1  | 6.68E-01 | 9.51E-01 | 535   |
| let-7a-5p    | 1.1  | 6.72E-01 | 9.52E-01 | 27324 |
| miR-127-5p   | -1.5 | 6.73E-01 | 9.52E-01 | 5     |
| miR-125b-5p  | -1.1 | 6.82E-01 | 9.55E-01 | 1302  |
| miR-1294     | 1.1  | 6.83E-01 | 9.55E-01 | 70    |
| miR-766-3p   | 1.2  | 6.84E-01 | 9.55E-01 | 7     |
| miR-99a-5p   | -1.1 | 6.89E-01 | 9.55E-01 | 334   |
| miR-6780a-5p | 1.1  | 6.96E-01 | 9.55E-01 | 6     |
| miR-548at-5p | -1.1 | 6.98E-01 | 9.55E-01 | 7     |
| miR-885-3p   | 1.2  | 7.02E-01 | 9.55E-01 | 61    |
| miR-6862-5p  | 1.4  | 7.03E-01 | 9.55E-01 | 5     |
| miR-454-5p   | 1.1  | 7.04E-01 | 9.55E-01 | 21    |
| miR-1343-3p  | -1.1 | 7.05E-01 | 9.55E-01 | 8     |
| miR-15b-3p   | -1.1 | 7.06E-01 | 9.55E-01 | 38    |
| miR-30c-5p   | 1.1  | 7.07E-01 | 9.55E-01 | 62    |
| miR-365b-3p  | -1.1 | 7.08E-01 | 9.55E-01 | 12    |
| miR-101-3p   | 1.1  | 7.08E-01 | 9.55E-01 | 4921  |
| miR-28-3p    | -1.1 | 7.10E-01 | 9.55E-01 | 359   |
| miR-139-5p   | -1.1 | 7.17E-01 | 9.55E-01 | 13    |
| miR-130b-5p  | 1.1  | 7.18E-01 | 9.55E-01 | 11    |
| miR-224-5p   | -1.1 | 7.20E-01 | 9.55E-01 | 23    |

|              |      |          |          |       |
|--------------|------|----------|----------|-------|
| miR-301a-3p  | -1.1 | 7.22E-01 | 9.55E-01 | 17    |
| miR-3200-3p  | 1.2  | 7.25E-01 | 9.55E-01 | 9     |
| miR-21-5p    | 1.0  | 7.27E-01 | 9.55E-01 | 23355 |
| miR-486-3p   | -1.1 | 7.31E-01 | 9.55E-01 | 87    |
| miR-19b-3p   | 1.1  | 7.32E-01 | 9.55E-01 | 570   |
| miR-132-5p   | 1.2  | 7.34E-01 | 9.55E-01 | 7     |
| miR-148b-3p  | -1.0 | 7.35E-01 | 9.55E-01 | 785   |
| miR-6803-3p  | -1.1 | 7.35E-01 | 9.55E-01 | 15    |
| miR-145-5p   | -1.1 | 7.36E-01 | 9.55E-01 | 22    |
| miR-6511a-3p | 1.1  | 7.39E-01 | 9.56E-01 | 8     |
| miR-4685-3p  | -1.1 | 7.41E-01 | 9.56E-01 | 8     |
| miR-874-3p   | 1.1  | 7.44E-01 | 9.57E-01 | 32    |
| miR-106a-5p  | 1.1  | 7.57E-01 | 9.70E-01 | 10    |
| miR-211-5p   | 1.2  | 7.61E-01 | 9.73E-01 | 7     |
| miR-30e-5p   | -1.0 | 7.75E-01 | 9.80E-01 | 4562  |
| miR-141-3p   | 1.1  | 7.80E-01 | 9.80E-01 | 53    |
| miR-501-3p   | 1.0  | 7.83E-01 | 9.80E-01 | 204   |
| miR-4429     | -1.1 | 7.85E-01 | 9.80E-01 | 7     |
| miR-760      | -1.1 | 7.87E-01 | 9.80E-01 | 30    |
| miR-320c     | -1.1 | 7.89E-01 | 9.80E-01 | 129   |
| miR-25-3p    | -1.0 | 7.89E-01 | 9.80E-01 | 14922 |
| miR-330-3p   | -1.1 | 7.91E-01 | 9.80E-01 | 7     |
| miR-191-5p   | -1.0 | 7.91E-01 | 9.80E-01 | 3448  |
| miR-3173-5p  | 1.1  | 7.95E-01 | 9.80E-01 | 22    |
| miR-185-5p   | 1.0  | 7.96E-01 | 9.80E-01 | 3116  |
| miR-6747-3p  | -1.1 | 7.96E-01 | 9.80E-01 | 6     |
| miR-3934-5p  | -1.2 | 7.97E-01 | 9.80E-01 | 4     |
| miR-92b-3p   | -1.0 | 8.05E-01 | 9.84E-01 | 493   |
| miR-2110     | 1.1  | 8.05E-01 | 9.84E-01 | 56    |
| miR-16-2-3p  | 1.0  | 8.09E-01 | 9.84E-01 | 34    |
| miR-1307-5p  | 1.1  | 8.09E-01 | 9.84E-01 | 21    |
| miR-3198     | -1.0 | 8.15E-01 | 9.87E-01 | 5     |
| miR-17-3p    | -1.1 | 8.16E-01 | 9.87E-01 | 11    |
| miR-10a-3p   | 1.2  | 8.18E-01 | 9.87E-01 | 9     |
| miR-130a-3p  | 1.1  | 8.21E-01 | 9.87E-01 | 74    |
| miR-6764-5p  | 1.2  | 8.25E-01 | 9.89E-01 | 6     |
| miR-483-3p   | -1.1 | 8.27E-01 | 9.89E-01 | 260   |
| miR-503-5p   | 1.0  | 8.30E-01 | 9.90E-01 | 38    |
| miR-423-5p   | -1.0 | 8.32E-01 | 9.90E-01 | 7674  |
| miR-324-5p   | -1.0 | 8.40E-01 | 9.93E-01 | 86    |
| miR-1249     | -1.0 | 8.48E-01 | 9.93E-01 | 12    |

|              |      |          |          |        |
|--------------|------|----------|----------|--------|
| miR-152-3p   | -1.0 | 8.54E-01 | 9.93E-01 | 156    |
| miR-16-5p    | 1.0  | 8.59E-01 | 9.93E-01 | 334345 |
| miR-142-5p   | 1.0  | 8.61E-01 | 9.93E-01 | 2532   |
| miR-532-3p   | -1.0 | 8.61E-01 | 9.93E-01 | 56     |
| miR-2116-3p  | 1.1  | 8.61E-01 | 9.93E-01 | 7      |
| miR-183-5p   | -1.0 | 8.66E-01 | 9.93E-01 | 532    |
| miR-486-5p   | -1.0 | 8.70E-01 | 9.93E-01 | 217490 |
| miR-1229-3p  | -1.0 | 8.70E-01 | 9.93E-01 | 7      |
| miR-320b     | 1.0  | 8.71E-01 | 9.93E-01 | 151    |
| miR-23a-3p   | 1.0  | 8.71E-01 | 9.93E-01 | 812    |
| miR-451a     | -1.0 | 8.71E-01 | 9.93E-01 | 18628  |
| miR-331-3p   | 1.0  | 8.73E-01 | 9.93E-01 | 9      |
| miR-361-5p   | -1.0 | 8.75E-01 | 9.93E-01 | 257    |
| miR-429      | -1.0 | 8.79E-01 | 9.93E-01 | 7      |
| miR-342-5p   | -1.1 | 8.79E-01 | 9.93E-01 | 5      |
| miR-185-3p   | -1.0 | 8.81E-01 | 9.93E-01 | 66     |
| miR-190b     | -1.0 | 8.81E-01 | 9.93E-01 | 32     |
| miR-200a-3p  | 1.1  | 8.81E-01 | 9.93E-01 | 34     |
| miR-148a-5p  | -1.0 | 8.91E-01 | 9.96E-01 | 8      |
| miR-146a-5p  | -1.0 | 8.91E-01 | 9.96E-01 | 4532   |
| let-7d-3p    | -1.0 | 8.92E-01 | 9.96E-01 | 287    |
| miR-144-3p   | -1.0 | 8.97E-01 | 9.96E-01 | 209    |
| miR-942-5p   | -1.0 | 9.02E-01 | 9.96E-01 | 71     |
| miR-6511b-3p | 1.1  | 9.03E-01 | 9.96E-01 | 9      |
| miR-221-3p   | -1.0 | 9.03E-01 | 9.96E-01 | 1293   |
| miR-20a-5p   | -1.0 | 9.06E-01 | 9.96E-01 | 416    |
| miR-937-3p   | -1.1 | 9.07E-01 | 9.96E-01 | 5      |
| miR-450b-5p  | 1.0  | 9.11E-01 | 9.96E-01 | 11     |
| miR-374a-3p  | -1.0 | 9.12E-01 | 9.96E-01 | 11     |
| miR-1180-3p  | 1.0  | 9.12E-01 | 9.96E-01 | 164    |
| miR-182-5p   | -1.0 | 9.15E-01 | 9.97E-01 | 959    |
| let-7b-5p    | 1.0  | 9.17E-01 | 9.97E-01 | 33604  |
| miR-548ay-5p | 1.0  | 9.23E-01 | 1.00E+00 | 15     |
| miR-6805-5p  | 1.0  | 9.26E-01 | 1.00E+00 | 7      |
| let-7i-5p    | 1.0  | 9.31E-01 | 1.00E+00 | 17929  |
| miR-7151-3p  | 1.1  | 9.33E-01 | 1.00E+00 | 5      |
| miR-7-1-3p   | -1.0 | 9.41E-01 | 1.00E+00 | 7      |
| miR-150-5p   | -1.0 | 9.41E-01 | 1.00E+00 | 2592   |
| miR-20b-5p   | -1.0 | 9.49E-01 | 1.00E+00 | 223    |
| miR-378a-5p  | 1.0  | 9.53E-01 | 1.00E+00 | 14     |
| let-7g-5p    | -1.0 | 9.53E-01 | 1.00E+00 | 1408   |

|                     |      |          |          |      |
|---------------------|------|----------|----------|------|
| <b>miR-3682-3p</b>  | 1.0  | 9.57E-01 | 1.00E+00 | 6    |
| <b>miR-365a-5p</b>  | 1.1  | 9.58E-01 | 1.00E+00 | 6    |
| <b>miR-29c-5p</b>   | 1.0  | 9.60E-01 | 1.00E+00 | 12   |
| <b>miR-375</b>      | 1.0  | 9.61E-01 | 1.00E+00 | 465  |
| <b>miR-330-5p</b>   | 1.1  | 9.66E-01 | 1.00E+00 | 4    |
| <b>miR-98-5p</b>    | 1.0  | 9.68E-01 | 1.00E+00 | 137  |
| <b>miR-142-3p</b>   | -1.0 | 9.72E-01 | 1.00E+00 | 1713 |
| <b>miR-4446-3p</b>  | 1.0  | 9.72E-01 | 1.00E+00 | 13   |
| <b>miR-92b-5p</b>   | -1.0 | 9.82E-01 | 1.00E+00 | 33   |
| <b>miR-204-5p</b>   | -1.0 | 9.88E-01 | 1.00E+00 | 12   |
| <b>miR-590-3p</b>   | -1.0 | 9.88E-01 | 1.00E+00 | 14   |
| <b>miR-93-5p</b>    | 1.0  | 9.89E-01 | 1.00E+00 | 7457 |
| <b>miR-139-3p</b>   | -1.0 | 9.89E-01 | 1.00E+00 | 173  |
| <b>miR-3913-5p</b>  | -1.1 | 9.97E-01 | 1.00E+00 | 12   |
| <b>miR-6796-5p</b>  | 1.2  | 1.00E+00 | 1.00E+00 | 4    |
| <b>miR-3150a-5p</b> | 1.2  | 1.00E+00 | 1.00E+00 | 4    |
| <b>miR-877-3p</b>   | 1.1  | 1.00E+00 | 1.00E+00 | 6    |
| <b>miR-550a-3p</b>  | 1.0  | 1.00E+00 | 1.00E+00 | 13   |
| <b>miR-3928-3p</b>  | -1.0 | 1.00E+00 | 1.00E+00 | 7    |
| <b>let-7b-3p</b>    | 1.0  | 1.00E+00 | 1.00E+00 | 19   |
| <b>miR-1296-5p</b>  | -1.0 | 1.00E+00 | 1.00E+00 | 6    |
| <b>miR-6734-5p</b>  | 1.0  | 1.00E+00 | 1.00E+00 | 7    |
| <b>miR-6842-3p</b>  | 1.0  | 1.00E+00 | 1.00E+00 | 7    |
| <b>miR-26a-1-3p</b> | -1.0 | 1.00E+00 | 1.00E+00 | 6    |
| <b>miR-1287-5p</b>  | -1.0 | 1.00E+00 | 1.00E+00 | 17   |



**Table S2. Differential expression analysis of 392 miRNAs detected in plasma from women without ACS (cohort 2) and a history of preeclampsia (PE, n=20) versus normotensive (NT, n=20) pregnancy.** MiRNA levels are expressed as mean counts per million mapped reads (CPM). MiRNAs are listed in descending order of statistical significance.

| miRNA        | Fold Change (PE/NT) | p value  | FDR-adjusted p value | miR level (CPM) |
|--------------|---------------------|----------|----------------------|-----------------|
| miR-122-5p   | -2.6                | 4.65E-04 | 1.82E-01             | 15405           |
| miR-29a-3p   | -1.4                | 1.98E-03 | 2.37E-01             | 449             |
| miR-99a-5p   | -1.5                | 2.17E-03 | 2.37E-01             | 126             |
| miR-203a     | -2.4                | 2.67E-03 | 2.37E-01             | 251             |
| miR-125b-5p  | -1.5                | 3.07E-03 | 2.37E-01             | 603             |
| miR-1299     | 4.0                 | 3.63E-03 | 2.37E-01             | 10              |
| miR-205-5p   | -1.6                | 4.95E-03 | 2.77E-01             | 56              |
| miR-4662a-5p | -2.0                | 9.21E-03 | 4.51E-01             | 4               |
| miR-193b-5p  | -2.0                | 1.11E-02 | 4.84E-01             | 17              |
| miR-9-5p     | -2.9                | 1.40E-02 | 5.32E-01             | 8               |
| miR-382-3p   | -1.7                | 1.49E-02 | 5.32E-01             | 15              |
| miR-885-3p   | -2.3                | 1.74E-02 | 5.70E-01             | 15              |
| miR-206      | -1.8                | 2.06E-02 | 6.21E-01             | 34              |
| miR-877-3p   | 1.6                 | 2.32E-02 | 6.50E-01             | 8               |
| miR-204-5p   | -1.7                | 2.68E-02 | 7.02E-01             | 8               |
| miR-885-5p   | -2.0                | 2.95E-02 | 7.23E-01             | 8               |
| miR-22-3p    | 1.3                 | 3.47E-02 | 7.63E-01             | 506             |
| miR-376a-3p  | -1.6                | 3.50E-02 | 7.63E-01             | 8               |
| miR-1224-5p  | 2.1                 | 3.78E-02 | 7.79E-01             | 10              |
| miR-30a-5p   | -1.2                | 4.93E-02 | 9.18E-01             | 491             |
| miR-5189-3p  | -1.7                | 5.07E-02 | 9.18E-01             | 5               |
| miR-598-3p   | -1.3                | 5.15E-02 | 9.18E-01             | 34              |
| miR-483-5p   | -1.5                | 6.03E-02 | 1.00E+00             | 118             |
| miR-329-3p   | -1.7                | 6.26E-02 | 1.00E+00             | 9               |
| miR-543      | -1.5                | 7.29E-02 | 1.00E+00             | 7               |
| miR-27b-3p   | -1.2                | 7.61E-02 | 1.00E+00             | 439             |
| miR-25-5p    | 1.3                 | 7.65E-02 | 1.00E+00             | 37              |
| miR-33a-5p   | 1.4                 | 7.67E-02 | 1.00E+00             | 6               |
| miR-1294     | 1.4                 | 8.99E-02 | 1.00E+00             | 56              |
| miR-652-3p   | 1.2                 | 9.10E-02 | 1.00E+00             | 52              |
| miR-625-5p   | 1.4                 | 9.20E-02 | 1.00E+00             | 8               |
| miR-378a-5p  | -1.5                | 9.48E-02 | 1.00E+00             | 8               |
| miR-1287-5p  | 1.3                 | 9.80E-02 | 1.00E+00             | 14              |
| miR-28-5p    | -1.5                | 1.10E-01 | 1.00E+00             | 6               |

|               |      |          |          |       |
|---------------|------|----------|----------|-------|
| miR-483-3p    | -1.5 | 1.14E-01 | 1.00E+00 | 117   |
| miR-625-3p    | 1.3  | 1.16E-01 | 1.00E+00 | 528   |
| miR-143-3p    | 1.2  | 1.18E-01 | 1.00E+00 | 873   |
| miR-96-5p     | -1.4 | 1.21E-01 | 1.00E+00 | 93    |
| miR-181c-5p   | -1.4 | 1.30E-01 | 1.00E+00 | 12    |
| miR-196b-5p   | 1.3  | 1.31E-01 | 1.00E+00 | 202   |
| miR-485-3p    | -1.4 | 1.35E-01 | 1.00E+00 | 180   |
| miR-629-5p    | 1.2  | 1.35E-01 | 1.00E+00 | 198   |
| miR-503-5p    | 1.3  | 1.36E-01 | 1.00E+00 | 30    |
| miR-423-5p    | 1.2  | 1.37E-01 | 1.00E+00 | 6692  |
| miR-4646-3p   | -1.3 | 1.45E-01 | 1.00E+00 | 7     |
| miR-556-3p    | -1.6 | 1.53E-01 | 1.00E+00 | 4     |
| miR-324-3p    | 1.2  | 1.60E-01 | 1.00E+00 | 31    |
| miR-548a-3p   | -1.6 | 1.60E-01 | 1.00E+00 | 4     |
| miR-487b-5p   | -1.5 | 1.66E-01 | 1.00E+00 | 5     |
| miR-548l      | 1.3  | 1.71E-01 | 1.00E+00 | 8     |
| miR-377-3p    | -1.5 | 1.79E-01 | 1.00E+00 | 5     |
| miR-140-3p    | -1.2 | 1.80E-01 | 1.00E+00 | 650   |
| miR-2110      | 1.2  | 1.85E-01 | 1.00E+00 | 55    |
| let-7d-3p     | 1.1  | 1.91E-01 | 1.00E+00 | 317   |
| miR-140-5p    | 1.2  | 1.94E-01 | 1.00E+00 | 49    |
| miR-484       | 1.2  | 1.95E-01 | 1.00E+00 | 2471  |
| miR-454-3p    | 1.3  | 1.96E-01 | 1.00E+00 | 157   |
| miR-196a-5p   | 1.5  | 1.99E-01 | 1.00E+00 | 7     |
| miR-3613-5p   | 1.3  | 2.04E-01 | 1.00E+00 | 415   |
| miR-150-5p    | -1.3 | 2.05E-01 | 1.00E+00 | 1679  |
| miR-142-3p    | 1.2  | 2.10E-01 | 1.00E+00 | 1340  |
| miR-99b-5p    | -1.3 | 2.10E-01 | 1.00E+00 | 511   |
| miR-130b-3p   | 1.2  | 2.13E-01 | 1.00E+00 | 24    |
| miR-664b-5p   | 1.2  | 2.24E-01 | 1.00E+00 | 12    |
| miR-1         | -1.3 | 2.27E-01 | 1.00E+00 | 132   |
| miR-17-3p     | -1.3 | 2.29E-01 | 1.00E+00 | 7     |
| miR-125b-2-3p | -1.5 | 2.34E-01 | 1.00E+00 | 5     |
| let-7f-5p     | 1.2  | 2.39E-01 | 1.00E+00 | 19987 |
| miR-7151-3p   | -1.5 | 2.43E-01 | 1.00E+00 | 4     |
| miR-95-3p     | -1.4 | 2.43E-01 | 1.00E+00 | 6     |
| miR-494-3p    | -1.3 | 2.47E-01 | 1.00E+00 | 12    |
| miR-942-5p    | 1.2  | 2.50E-01 | 1.00E+00 | 77    |
| miR-98-5p     | 1.1  | 2.52E-01 | 1.00E+00 | 201   |
| miR-1260a     | 1.3  | 2.55E-01 | 1.00E+00 | 10    |
| miR-338-3p    | -1.2 | 2.69E-01 | 1.00E+00 | 18    |

|               |      |          |          |       |
|---------------|------|----------|----------|-------|
| miR-4738-3p   | 1.5  | 2.73E-01 | 1.00E+00 | 4     |
| miR-100-5p    | -1.3 | 2.74E-01 | 1.00E+00 | 85    |
| miR-3168      | -1.4 | 2.78E-01 | 1.00E+00 | 31    |
| miR-1538      | 1.3  | 2.78E-01 | 1.00E+00 | 5     |
| miR-548d-5p   | 1.3  | 2.79E-01 | 1.00E+00 | 11    |
| miR-185-3p    | 1.1  | 2.80E-01 | 1.00E+00 | 85    |
| miR-34a-5p    | -1.2 | 2.80E-01 | 1.00E+00 | 14    |
| miR-382-5p    | -1.3 | 2.83E-01 | 1.00E+00 | 489   |
| miR-26b-3p    | 1.2  | 2.87E-01 | 1.00E+00 | 7     |
| miR-550a-3p   | 1.3  | 2.87E-01 | 1.00E+00 | 11    |
| miR-6805-5p   | 1.3  | 2.89E-01 | 1.00E+00 | 7     |
| miR-6515-3p   | 1.3  | 2.92E-01 | 1.00E+00 | 5     |
| miR-27a-3p    | -1.1 | 2.93E-01 | 1.00E+00 | 125   |
| miR-210-3p    | 1.3  | 2.96E-01 | 1.00E+00 | 11    |
| miR-345-5p    | -1.2 | 3.04E-01 | 1.00E+00 | 22    |
| miR-26b-5p    | 1.1  | 3.04E-01 | 1.00E+00 | 5431  |
| miR-1292-5p   | -1.2 | 3.05E-01 | 1.00E+00 | 9     |
| miR-3605-3p   | 1.2  | 3.08E-01 | 1.00E+00 | 37    |
| miR-664a-5p   | 1.1  | 3.09E-01 | 1.00E+00 | 132   |
| miR-1908-5p   | 1.2  | 3.15E-01 | 1.00E+00 | 75    |
| miR-16-2-3p   | 1.2  | 3.17E-01 | 1.00E+00 | 28    |
| miR-337-5p    | -1.4 | 3.17E-01 | 1.00E+00 | 5     |
| miR-192-5p    | -1.2 | 3.18E-01 | 1.00E+00 | 550   |
| miR-10b-5p    | -1.2 | 3.20E-01 | 1.00E+00 | 525   |
| miR-148a-3p   | -1.1 | 3.27E-01 | 1.00E+00 | 2413  |
| miR-181a-2-3p | -1.2 | 3.29E-01 | 1.00E+00 | 46    |
| miR-31-5p     | 1.7  | 3.31E-01 | 1.00E+00 | 4     |
| miR-1247-5p   | -1.3 | 3.32E-01 | 1.00E+00 | 7     |
| miR-3173-5p   | 1.1  | 3.32E-01 | 1.00E+00 | 23    |
| miR-431-5p    | -1.2 | 3.33E-01 | 1.00E+00 | 134   |
| miR-6741-5p   | 1.3  | 3.34E-01 | 1.00E+00 | 6     |
| miR-186-5p    | 1.1  | 3.34E-01 | 1.00E+00 | 279   |
| miR-532-3p    | 1.2  | 3.37E-01 | 1.00E+00 | 42    |
| let-7b-3p     | -1.2 | 3.37E-01 | 1.00E+00 | 12    |
| miR-1249      | -1.2 | 3.40E-01 | 1.00E+00 | 19    |
| miR-374a-3p   | 1.2  | 3.45E-01 | 1.00E+00 | 13    |
| miR-191-5p    | -1.1 | 3.52E-01 | 1.00E+00 | 4263  |
| miR-342-3p    | -1.2 | 3.57E-01 | 1.00E+00 | 3886  |
| miR-4742-3p   | 1.2  | 3.60E-01 | 1.00E+00 | 16    |
| miR-4669      | 1.6  | 3.62E-01 | 1.00E+00 | 5     |
| let-7i-5p     | 1.1  | 3.66E-01 | 1.00E+00 | 24167 |

|             |      |          |          |        |
|-------------|------|----------|----------|--------|
| miR-1296-5p | 1.2  | 3.66E-01 | 1.00E+00 | 8      |
| miR-4467    | -1.6 | 3.67E-01 | 1.00E+00 | 4      |
| miR-4732-5p | 1.2  | 3.67E-01 | 1.00E+00 | 172    |
| miR-3198    | 1.2  | 3.68E-01 | 1.00E+00 | 5      |
| miR-107     | 1.2  | 3.69E-01 | 1.00E+00 | 265    |
| miR-223-5p  | 1.1  | 3.72E-01 | 1.00E+00 | 415    |
| miR-505-5p  | 1.2  | 3.73E-01 | 1.00E+00 | 12     |
| miR-15b-3p  | 1.2  | 3.74E-01 | 1.00E+00 | 31     |
| miR-1246    | -1.2 | 3.76E-01 | 1.00E+00 | 17     |
| miR-92b-3p  | 1.1  | 3.77E-01 | 1.00E+00 | 630    |
| miR-222-3p  | 1.1  | 3.82E-01 | 1.00E+00 | 84     |
| miR-6786-3p | 1.3  | 3.86E-01 | 1.00E+00 | 6      |
| miR-136-3p  | -1.3 | 3.86E-01 | 1.00E+00 | 9      |
| miR-148a-5p | -1.2 | 3.87E-01 | 1.00E+00 | 8      |
| miR-1270    | -1.2 | 3.88E-01 | 1.00E+00 | 16     |
| miR-3613-3p | -1.3 | 3.91E-01 | 1.00E+00 | 5      |
| miR-627-5p  | 1.2  | 3.91E-01 | 1.00E+00 | 5      |
| miR-1226-3p | 1.2  | 3.91E-01 | 1.00E+00 | 13     |
| let-7c-5p   | -1.1 | 3.92E-01 | 1.00E+00 | 579    |
| miR-221-3p  | -1.1 | 3.94E-01 | 1.00E+00 | 1580   |
| miR-628-3p  | 1.1  | 3.96E-01 | 1.00E+00 | 83     |
| miR-15b-5p  | 1.2  | 3.96E-01 | 1.00E+00 | 474    |
| miR-487b-3p | -1.3 | 4.03E-01 | 1.00E+00 | 9      |
| miR-3187-3p | -1.1 | 4.11E-01 | 1.00E+00 | 18     |
| miR-4732-3p | 1.2  | 4.12E-01 | 1.00E+00 | 230    |
| miR-4435    | 1.2  | 4.14E-01 | 1.00E+00 | 4      |
| miR-320a    | 1.1  | 4.16E-01 | 1.00E+00 | 1427   |
| miR-6764-5p | 1.2  | 4.17E-01 | 1.00E+00 | 4      |
| miR-491-5p  | 1.2  | 4.18E-01 | 1.00E+00 | 17     |
| miR-365b-3p | -1.3 | 4.20E-01 | 1.00E+00 | 5      |
| miR-1976    | 1.2  | 4.20E-01 | 1.00E+00 | 48     |
| miR-139-5p  | -1.2 | 4.23E-01 | 1.00E+00 | 11     |
| miR-654-3p  | -1.2 | 4.24E-01 | 1.00E+00 | 82     |
| miR-3928-3p | -1.2 | 4.26E-01 | 1.00E+00 | 6      |
| miR-92a-3p  | 1.1  | 4.28E-01 | 1.00E+00 | 153484 |
| let-7d-5p   | 1.1  | 4.30E-01 | 1.00E+00 | 1729   |
| miR-7706    | 1.2  | 4.33E-01 | 1.00E+00 | 16     |
| miR-103a-3p | 1.1  | 4.38E-01 | 1.00E+00 | 6256   |
| miR-485-5p  | -1.2 | 4.45E-01 | 1.00E+00 | 93     |
| let-7a-5p   | 1.1  | 4.49E-01 | 1.00E+00 | 31676  |
| miR-376c-3p | -1.3 | 4.50E-01 | 1.00E+00 | 8      |

|             |      |          |          |       |
|-------------|------|----------|----------|-------|
| miR-301a-3p | 1.1  | 4.57E-01 | 1.00E+00 | 21    |
| miR-125a-5p | -1.1 | 4.66E-01 | 1.00E+00 | 2273  |
| miR-486-3p  | 1.1  | 4.66E-01 | 1.00E+00 | 100   |
| miR-30e-5p  | 1.1  | 4.70E-01 | 1.00E+00 | 4051  |
| miR-191-3p  | -1.2 | 4.78E-01 | 1.00E+00 | 17    |
| miR-29c-5p  | 1.1  | 4.80E-01 | 1.00E+00 | 12    |
| miR-1179    | 1.2  | 4.82E-01 | 1.00E+00 | 6     |
| miR-134-5p  | -1.2 | 4.82E-01 | 1.00E+00 | 241   |
| miR-411-5p  | -1.2 | 4.91E-01 | 1.00E+00 | 23    |
| miR-136-5p  | 1.2  | 4.93E-01 | 1.00E+00 | 4     |
| miR-425-5p  | 1.1  | 4.99E-01 | 1.00E+00 | 5463  |
| miR-320d    | -1.1 | 5.07E-01 | 1.00E+00 | 28    |
| miR-5187-5p | 1.2  | 5.10E-01 | 1.00E+00 | 10    |
| miR-190a-5p | 1.2  | 5.11E-01 | 1.00E+00 | 159   |
| miR-7110-3p | 1.3  | 5.13E-01 | 1.00E+00 | 3     |
| miR-193a-5p | -1.1 | 5.24E-01 | 1.00E+00 | 88    |
| miR-493-3p  | -1.2 | 5.24E-01 | 1.00E+00 | 14    |
| miR-532-5p  | 1.1  | 5.24E-01 | 1.00E+00 | 213   |
| miR-106a-5p | 1.1  | 5.26E-01 | 1.00E+00 | 10    |
| miR-3127-5p | 1.2  | 5.27E-01 | 1.00E+00 | 6     |
| miR-197-3p  | 1.1  | 5.35E-01 | 1.00E+00 | 436   |
| miR-18b-3p  | -1.2 | 5.36E-01 | 1.00E+00 | 6     |
| let-7a-3p   | -1.1 | 5.36E-01 | 1.00E+00 | 6     |
| miR-323b-3p | -1.2 | 5.45E-01 | 1.00E+00 | 51    |
| miR-25-3p   | 1.1  | 5.50E-01 | 1.00E+00 | 13596 |
| miR-1343-3p | -1.1 | 5.50E-01 | 1.00E+00 | 9     |
| miR-194-5p  | -1.1 | 5.50E-01 | 1.00E+00 | 175   |
| miR-20b-5p  | -1.1 | 5.52E-01 | 1.00E+00 | 174   |
| miR-381-3p  | -1.1 | 5.52E-01 | 1.00E+00 | 66    |
| miR-7976    | 1.2  | 5.57E-01 | 1.00E+00 | 10    |
| miR-1180-3p | 1.1  | 5.61E-01 | 1.00E+00 | 191   |
| miR-127-5p  | 1.1  | 5.62E-01 | 1.00E+00 | 4     |
| miR-221-5p  | -1.1 | 5.72E-01 | 1.00E+00 | 20    |
| miR-23b-3p  | -1.0 | 5.76E-01 | 1.00E+00 | 86    |
| let-7g-5p   | 1.1  | 5.79E-01 | 1.00E+00 | 1962  |
| miR-92b-5p  | 1.1  | 5.80E-01 | 1.00E+00 | 47    |
| miR-3615    | 1.1  | 5.81E-01 | 1.00E+00 | 635   |
| miR-29c-3p  | -1.1 | 5.81E-01 | 1.00E+00 | 648   |
| miR-32-5p   | 1.1  | 5.82E-01 | 1.00E+00 | 308   |
| miR-5010-3p | -1.1 | 5.83E-01 | 1.00E+00 | 9     |
| miR-143-5p  | -1.1 | 5.94E-01 | 1.00E+00 | 8     |

|              |      |          |          |       |
|--------------|------|----------|----------|-------|
| miR-324-5p   | 1.1  | 5.96E-01 | 1.00E+00 | 128   |
| miR-375      | -1.1 | 5.99E-01 | 1.00E+00 | 404   |
| miR-3200-5p  | 1.2  | 6.00E-01 | 1.00E+00 | 6     |
| miR-766-3p   | 1.1  | 6.01E-01 | 1.00E+00 | 11    |
| miR-18a-3p   | -1.1 | 6.01E-01 | 1.00E+00 | 51    |
| miR-584-5p   | 1.1  | 6.04E-01 | 1.00E+00 | 1358  |
| miR-1260b    | 1.1  | 6.10E-01 | 1.00E+00 | 14    |
| miR-342-5p   | -1.2 | 6.12E-01 | 1.00E+00 | 5     |
| miR-409-3p   | -1.1 | 6.12E-01 | 1.00E+00 | 846   |
| miR-10a-5p   | -1.0 | 6.17E-01 | 1.00E+00 | 572   |
| miR-3200-3p  | 1.1  | 6.17E-01 | 1.00E+00 | 7     |
| miR-7-5p     | 1.1  | 6.17E-01 | 1.00E+00 | 545   |
| miR-378c     | -1.2 | 6.18E-01 | 1.00E+00 | 5     |
| miR-323a-3p  | -1.1 | 6.22E-01 | 1.00E+00 | 36    |
| miR-3177-3p  | -1.1 | 6.23E-01 | 1.00E+00 | 8     |
| miR-3913-5p  | 1.1  | 6.31E-01 | 1.00E+00 | 9     |
| miR-101-3p   | 1.1  | 6.33E-01 | 1.00E+00 | 4474  |
| miR-548ay-5p | 1.1  | 6.34E-01 | 1.00E+00 | 12    |
| miR-224-5p   | -1.1 | 6.38E-01 | 1.00E+00 | 18    |
| miR-548j-5p  | 1.1  | 6.38E-01 | 1.00E+00 | 54    |
| miR-146b-5p  | -1.1 | 6.39E-01 | 1.00E+00 | 374   |
| miR-148b-5p  | -1.1 | 6.41E-01 | 1.00E+00 | 16    |
| miR-370-3p   | 1.1  | 6.41E-01 | 1.00E+00 | 55    |
| miR-502-3p   | 1.1  | 6.41E-01 | 1.00E+00 | 31    |
| miR-3620-3p  | -1.1 | 6.48E-01 | 1.00E+00 | 4     |
| miR-320c     | -1.1 | 6.53E-01 | 1.00E+00 | 51    |
| miR-21-3p    | -1.1 | 6.57E-01 | 1.00E+00 | 9     |
| miR-4750-5p  | 1.2  | 6.59E-01 | 1.00E+00 | 4     |
| miR-30d-5p   | 1.0  | 6.60E-01 | 1.00E+00 | 18694 |
| miR-152-3p   | 1.1  | 6.64E-01 | 1.00E+00 | 142   |
| miR-941      | 1.1  | 6.66E-01 | 1.00E+00 | 172   |
| miR-21-5p    | 1.0  | 6.67E-01 | 1.00E+00 | 15203 |
| miR-4433-5p  | 1.1  | 6.67E-01 | 1.00E+00 | 6     |
| miR-15a-5p   | 1.1  | 6.68E-01 | 1.00E+00 | 409   |
| miR-3158-3p  | -1.1 | 6.69E-01 | 1.00E+00 | 15    |
| miR-542-3p   | 1.1  | 6.72E-01 | 1.00E+00 | 13    |
| miR-744-5p   | -1.1 | 6.75E-01 | 1.00E+00 | 455   |
| miR-589-5p   | -1.1 | 6.76E-01 | 1.00E+00 | 20    |
| let-7e-5p    | -1.1 | 6.77E-01 | 1.00E+00 | 182   |
| miR-671-3p   | 1.1  | 6.89E-01 | 1.00E+00 | 27    |
| miR-5698     | 1.2  | 6.90E-01 | 1.00E+00 | 5     |

|              |      |          |          |        |
|--------------|------|----------|----------|--------|
| miR-423-3p   | 1.1  | 6.92E-01 | 1.00E+00 | 1036   |
| miR-636      | 1.1  | 6.93E-01 | 1.00E+00 | 18     |
| miR-1277-5p  | 1.1  | 6.93E-01 | 1.00E+00 | 20     |
| miR-486-5p   | 1.1  | 6.95E-01 | 1.00E+00 | 267381 |
| miR-505-3p   | -1.1 | 7.00E-01 | 1.00E+00 | 8      |
| miR-432-5p   | -1.1 | 7.05E-01 | 1.00E+00 | 915    |
| miR-361-3p   | 1.1  | 7.08E-01 | 1.00E+00 | 366    |
| miR-127-3p   | -1.1 | 7.10E-01 | 1.00E+00 | 24     |
| miR-3138     | 1.1  | 7.14E-01 | 1.00E+00 | 11     |
| miR-320b     | 1.0  | 7.15E-01 | 1.00E+00 | 67     |
| miR-1273h-3p | 1.1  | 7.16E-01 | 1.00E+00 | 18     |
| miR-1468-5p  | 1.1  | 7.20E-01 | 1.00E+00 | 8      |
| miR-142-5p   | 1.0  | 7.23E-01 | 1.00E+00 | 2015   |
| miR-6780a-5p | -1.2 | 7.23E-01 | 1.00E+00 | 5      |
| miR-18a-5p   | 1.1  | 7.25E-01 | 1.00E+00 | 32     |
| miR-501-5p   | -1.1 | 7.29E-01 | 1.00E+00 | 5      |
| miR-200a-3p  | 1.1  | 7.30E-01 | 1.00E+00 | 17     |
| miR-130a-3p  | 1.0  | 7.33E-01 | 1.00E+00 | 56     |
| miR-218-5p   | 1.3  | 7.34E-01 | 1.00E+00 | 5      |
| miR-4433b-3p | 1.1  | 7.36E-01 | 1.00E+00 | 44     |
| miR-452-5p   | -1.1 | 7.39E-01 | 1.00E+00 | 6      |
| miR-23b-5p   | 1.1  | 7.40E-01 | 1.00E+00 | 7      |
| miR-874-3p   | -1.0 | 7.41E-01 | 1.00E+00 | 15     |
| miR-760      | -1.1 | 7.42E-01 | 1.00E+00 | 28     |
| miR-146b-3p  | -1.1 | 7.43E-01 | 1.00E+00 | 12     |
| miR-664a-3p  | 1.1  | 7.48E-01 | 1.00E+00 | 13     |
| miR-628-5p   | -1.1 | 7.50E-01 | 1.00E+00 | 18     |
| miR-30e-3p   | -1.0 | 7.50E-01 | 1.00E+00 | 185    |
| miR-4685-3p  | 1.1  | 7.54E-01 | 1.00E+00 | 10     |
| miR-6881-3p  | -1.1 | 7.56E-01 | 1.00E+00 | 6      |
| miR-6842-3p  | -1.1 | 7.57E-01 | 1.00E+00 | 10     |
| miR-590-3p   | -1.0 | 7.57E-01 | 1.00E+00 | 18     |
| miR-3688-3p  | 1.1  | 7.59E-01 | 1.00E+00 | 11     |
| miR-24-3p    | 1.0  | 7.60E-01 | 1.00E+00 | 592    |
| miR-5193     | 1.1  | 7.63E-01 | 1.00E+00 | 5      |
| miR-145-5p   | 1.1  | 7.63E-01 | 1.00E+00 | 15     |
| miR-6747-3p  | -1.0 | 7.65E-01 | 1.00E+00 | 9      |
| miR-1237-3p  | -1.1 | 7.66E-01 | 1.00E+00 | 7      |
| miR-1307-5p  | 1.1  | 7.68E-01 | 1.00E+00 | 18     |
| miR-369-5p   | -1.1 | 7.69E-01 | 1.00E+00 | 34     |
| miR-181d-5p  | -1.1 | 7.72E-01 | 1.00E+00 | 21     |

|              |      |          |          |        |
|--------------|------|----------|----------|--------|
| miR-4446-3p  | -1.1 | 7.73E-01 | 1.00E+00 | 25     |
| miR-6511a-3p | 1.1  | 7.74E-01 | 1.00E+00 | 9      |
| miR-5189-5p  | 1.1  | 7.75E-01 | 1.00E+00 | 4      |
| miR-199a-3p  | 1.0  | 7.75E-01 | 1.00E+00 | 2127   |
| miR-769-5p   | -1.0 | 7.77E-01 | 1.00E+00 | 28     |
| miR-1255b-5p | 1.1  | 7.78E-01 | 1.00E+00 | 44     |
| miR-4433b-5p | 1.1  | 7.79E-01 | 1.00E+00 | 3099   |
| miR-16-5p    | 1.1  | 7.79E-01 | 1.00E+00 | 310612 |
| miR-30c-5p   | 1.0  | 7.80E-01 | 1.00E+00 | 51     |
| miR-26a-5p   | 1.0  | 7.81E-01 | 1.00E+00 | 5795   |
| miR-182-5p   | 1.1  | 7.82E-01 | 1.00E+00 | 1635   |
| miR-215-5p   | -1.1 | 7.82E-01 | 1.00E+00 | 31     |
| miR-495-3p   | -1.1 | 7.88E-01 | 1.00E+00 | 4      |
| miR-199b-5p  | -1.1 | 7.93E-01 | 1.00E+00 | 6      |
| miR-190b     | 1.0  | 7.95E-01 | 1.00E+00 | 22     |
| miR-200b-3p  | -1.1 | 7.97E-01 | 1.00E+00 | 15     |
| miR-379-5p   | -1.1 | 8.01E-01 | 1.00E+00 | 104    |
| miR-19b-3p   | -1.0 | 8.04E-01 | 1.00E+00 | 388    |
| miR-126-5p   | 1.0  | 8.09E-01 | 1.00E+00 | 3886   |
| miR-1304-3p  | 1.1  | 8.09E-01 | 1.00E+00 | 21     |
| miR-421      | 1.0  | 8.11E-01 | 1.00E+00 | 35     |
| miR-6803-3p  | -1.0 | 8.13E-01 | 1.00E+00 | 24     |
| miR-28-3p    | -1.0 | 8.13E-01 | 1.00E+00 | 493    |
| miR-151a-3p  | -1.0 | 8.17E-01 | 1.00E+00 | 2949   |
| miR-133a-3p  | 1.1  | 8.19E-01 | 1.00E+00 | 26     |
| miR-146a-3p  | -1.2 | 8.20E-01 | 1.00E+00 | 3      |
| miR-361-5p   | -1.0 | 8.22E-01 | 1.00E+00 | 225    |
| miR-1306-5p  | -1.0 | 8.24E-01 | 1.00E+00 | 437    |
| miR-144-5p   | -1.1 | 8.33E-01 | 1.00E+00 | 147    |
| miR-126-3p   | -1.0 | 8.37E-01 | 1.00E+00 | 13164  |
| miR-330-3p   | -1.0 | 8.38E-01 | 1.00E+00 | 9      |
| miR-199b-3p  | 1.0  | 8.39E-01 | 1.00E+00 | 1710   |
| miR-331-3p   | 1.0  | 8.41E-01 | 1.00E+00 | 13     |
| miR-339-5p   | -1.0 | 8.44E-01 | 1.00E+00 | 231    |
| miR-424-5p   | 1.1  | 8.44E-01 | 1.00E+00 | 7      |
| miR-378a-3p  | 1.0  | 8.45E-01 | 1.00E+00 | 185    |
| miR-23a-3p   | -1.0 | 8.45E-01 | 1.00E+00 | 785    |
| miR-26a-1-3p | -1.1 | 8.47E-01 | 1.00E+00 | 7      |
| miR-30b-5p   | -1.0 | 8.47E-01 | 1.00E+00 | 19     |
| miR-183-5p   | -1.0 | 8.48E-01 | 1.00E+00 | 703    |
| miR-150-3p   | -1.1 | 8.49E-01 | 1.00E+00 | 12     |



|              |      |          |          |       |
|--------------|------|----------|----------|-------|
| miR-6741-3p  | -1.0 | 8.53E-01 | 1.00E+00 | 15    |
| miR-335-5p   | -1.0 | 8.53E-01 | 1.00E+00 | 286   |
| miR-671-5p   | -1.0 | 8.53E-01 | 1.00E+00 | 65    |
| let-7b-5p    | 1.0  | 8.56E-01 | 1.00E+00 | 30143 |
| miR-30d-3p   | 1.1  | 8.59E-01 | 1.00E+00 | 6     |
| miR-106b-3p  | -1.0 | 8.59E-01 | 1.00E+00 | 616   |
| miR-6511b-3p | -1.0 | 8.63E-01 | 1.00E+00 | 9     |
| miR-6772-3p  | -1.1 | 8.64E-01 | 1.00E+00 | 8     |
| miR-1229-3p  | -1.0 | 8.65E-01 | 1.00E+00 | 11    |
| miR-106b-5p  | -1.0 | 8.65E-01 | 1.00E+00 | 27    |
| miR-181b-5p  | -1.0 | 8.66E-01 | 1.00E+00 | 183   |
| miR-20a-5p   | 1.0  | 8.67E-01 | 1.00E+00 | 410   |
| miR-363-3p   | 1.0  | 8.67E-01 | 1.00E+00 | 468   |
| miR-181c-3p  | 1.1  | 8.68E-01 | 1.00E+00 | 9     |
| miR-660-5p   | 1.0  | 8.70E-01 | 1.00E+00 | 356   |
| miR-6721-5p  | 1.0  | 8.74E-01 | 1.00E+00 | 13    |
| miR-181a-5p  | 1.0  | 8.75E-01 | 1.00E+00 | 1516  |
| miR-148b-3p  | 1.0  | 8.76E-01 | 1.00E+00 | 902   |
| miR-151a-5p  | -1.0 | 8.82E-01 | 1.00E+00 | 26    |
| miR-99b-3p   | -1.0 | 8.85E-01 | 1.00E+00 | 9     |
| miR-146a-5p  | 1.0  | 8.85E-01 | 1.00E+00 | 5516  |
| miR-296-5p   | -1.0 | 8.86E-01 | 1.00E+00 | 30    |
| miR-2355-3p  | 1.1  | 8.87E-01 | 1.00E+00 | 7     |
| miR-185-5p   | -1.0 | 8.96E-01 | 1.00E+00 | 2212  |
| miR-10a-3p   | 1.0  | 8.96E-01 | 1.00E+00 | 4     |
| miR-130b-5p  | 1.0  | 8.98E-01 | 1.00E+00 | 15    |
| miR-30a-3p   | 1.0  | 8.99E-01 | 1.00E+00 | 31    |
| miR-141-3p   | -1.0 | 9.02E-01 | 1.00E+00 | 23    |
| miR-19a-3p   | -1.0 | 9.03E-01 | 1.00E+00 | 108   |
| miR-493-5p   | -1.0 | 9.03E-01 | 1.00E+00 | 25    |
| miR-651-5p   | -1.0 | 9.06E-01 | 1.00E+00 | 13    |
| miR-29b-3p   | -1.0 | 9.13E-01 | 1.00E+00 | 118   |
| miR-1307-3p  | 1.0  | 9.13E-01 | 1.00E+00 | 1217  |
| miR-369-3p   | -1.0 | 9.16E-01 | 1.00E+00 | 27    |
| miR-155-5p   | 1.0  | 9.18E-01 | 1.00E+00 | 435   |
| miR-17-5p    | 1.0  | 9.21E-01 | 1.00E+00 | 162   |
| miR-181a-3p  | -1.0 | 9.27E-01 | 1.00E+00 | 31    |
| miR-335-3p   | -1.0 | 9.29E-01 | 1.00E+00 | 29    |
| miR-326      | 1.0  | 9.31E-01 | 1.00E+00 | 47    |
| miR-374b-5p  | 1.0  | 9.31E-01 | 1.00E+00 | 31    |
| miR-501-3p   | 1.0  | 9.33E-01 | 1.00E+00 | 144   |

|             |      |          |          |       |
|-------------|------|----------|----------|-------|
| miR-4665-5p | -1.0 | 9.38E-01 | 1.00E+00 | 4     |
| miR-1301-3p | -1.0 | 9.38E-01 | 1.00E+00 | 57    |
| miR-889-3p  | 1.0  | 9.43E-01 | 1.00E+00 | 36    |
| miR-454-5p  | 1.0  | 9.44E-01 | 1.00E+00 | 21    |
| miR-139-3p  | 1.0  | 9.46E-01 | 1.00E+00 | 226   |
| miR-132-3p  | 1.0  | 9.47E-01 | 1.00E+00 | 32    |
| miR-451a    | 1.0  | 9.54E-01 | 1.00E+00 | 14636 |
| miR-22-5p   | -1.0 | 9.57E-01 | 1.00E+00 | 7     |
| miR-340-5p  | -1.0 | 9.58E-01 | 1.00E+00 | 211   |
| miR-500a-3p | -1.0 | 9.61E-01 | 1.00E+00 | 23    |
| miR-128-3p  | 1.0  | 9.61E-01 | 1.00E+00 | 380   |
| miR-450b-5p | 1.0  | 9.65E-01 | 1.00E+00 | 7     |
| miR-223-3p  | -1.0 | 9.70E-01 | 1.00E+00 | 9090  |
| miR-576-5p  | 1.0  | 9.72E-01 | 1.00E+00 | 183   |
| miR-574-3p  | 1.0  | 9.72E-01 | 1.00E+00 | 49    |
| miR-200c-3p | -1.0 | 9.77E-01 | 1.00E+00 | 58    |
| miR-339-3p  | 1.0  | 9.78E-01 | 1.00E+00 | 44    |
| miR-6852-5p | 1.0  | 9.82E-01 | 1.00E+00 | 38    |
| miR-93-3p   | 1.0  | 9.83E-01 | 1.00E+00 | 35    |
| miR-93-5p   | -1.0 | 9.85E-01 | 1.00E+00 | 7863  |
| miR-144-3p  | -1.0 | 9.89E-01 | 1.00E+00 | 223   |
| miR-374a-5p | 1.0  | 9.92E-01 | 1.00E+00 | 141   |
| miR-328-3p  | -1.0 | 9.95E-01 | 1.00E+00 | 1229  |
| miR-425-3p  | -1.0 | 9.99E-01 | 1.00E+00 | 92    |
| miR-4533    | -1.1 | 1.00E+00 | 1.00E+00 | 4     |
| miR-3940-3p | 1.0  | 1.00E+00 | 1.00E+00 | 9     |
| miR-5010-5p | 1.0  | 1.00E+00 | 1.00E+00 | 7     |
| miR-195-5p  | -1.0 | 1.00E+00 | 1.00E+00 | 33    |
| miR-409-5p  | -1.0 | 1.00E+00 | 1.00E+00 | 6     |
| miR-199a-5p | -1.0 | 1.00E+00 | 1.00E+00 | 29    |

**Table S3. Differential expression analysis of 458 miRNAs detected in plasma between women with (n=35) and without (n=40) acute coronary syndrome. MiRNA levels are expressed as mean counts per million mapped reads (CPM). MiRNAs are listed in descending order of statistical significance.**

| miRNA        | Fold Change (ACS/non-ACS) | p value  | FDR-adjusted p value | miR level (CPM) |
|--------------|---------------------------|----------|----------------------|-----------------|
| miR-208b-3p  | 148.0                     | 1.18E-23 | 5.39E-21             | 37              |
| miR-29a-3p   | 2.2                       | 3.12E-23 | 7.14E-21             | 726             |
| miR-378a-3p  | 2.4                       | 3.39E-18 | 5.18E-16             | 303             |
| miR-30a-5p   | 2.3                       | 2.48E-17 | 2.84E-15             | 828             |
| miR-499a-5p  | 34.2                      | 8.30E-17 | 7.60E-15             | 19              |
| miR-193a-5p  | 3.3                       | 1.08E-16 | 8.24E-15             | 181             |
| miR-34a-5p   | 3.9                       | 1.32E-16 | 8.64E-15             | 32              |
| miR-10b-5p   | 2.5                       | 4.51E-16 | 2.53E-14             | 897             |
| miR-195-5p   | 2.8                       | 4.98E-16 | 2.53E-14             | 61              |
| miR-483-5p   | 4.4                       | 7.31E-16 | 3.35E-14             | 305             |
| miR-320c     | 2.3                       | 1.01E-13 | 4.20E-12             | 84              |
| miR-320d     | 2.3                       | 1.39E-13 | 5.30E-12             | 45              |
| miR-99a-5p   | 2.4                       | 1.53E-13 | 5.38E-12             | 214             |
| miR-320b     | 2.1                       | 4.78E-12 | 1.56E-10             | 103             |
| miR-1306-5p  | -1.9                      | 7.19E-12 | 2.19E-10             | 369             |
| miR-194-5p   | 2.5                       | 7.64E-12 | 2.19E-10             | 298             |
| miR-184      | 11.7                      | 9.00E-12 | 2.43E-10             | 24              |
| miR-193b-5p  | 4.3                       | 1.07E-11 | 2.73E-10             | 43              |
| miR-29c-3p   | 1.8                       | 2.87E-11 | 6.91E-10             | 896             |
| miR-208a-3p  | 15.2                      | 7.87E-11 | 1.80E-09             | 3               |
| miR-221-5p   | -3.4                      | 9.56E-11 | 2.08E-09             | 16              |
| miR-206      | 6.9                       | 4.15E-10 | 8.65E-09             | 127             |
| miR-4433b-5p | -4.0                      | 7.04E-10 | 1.38E-08             | 2369            |
| miR-6772-3p  | -4.1                      | 7.21E-10 | 1.38E-08             | 7               |
| miR-378c     | 2.9                       | 8.02E-10 | 1.47E-08             | 9               |
| miR-423-3p   | -2.1                      | 1.84E-09 | 3.24E-08             | 858             |
| miR-5010-3p  | -3.3                      | 2.07E-09 | 3.52E-08             | 8               |
| miR-584-5p   | -2.2                      | 2.23E-09 | 3.64E-08             | 1129            |
| miR-328-3p   | -2.3                      | 4.61E-09 | 7.28E-08             | 1034            |
| miR-4646-3p  | -3.0                      | 5.76E-09 | 8.79E-08             | 6               |
| miR-95-3p    | 2.9                       | 1.03E-08 | 1.52E-07             | 11              |
| miR-127-3p   | -4.1                      | 1.45E-08 | 2.07E-07             | 19              |
| miR-30e-3p   | -1.9                      | 1.67E-08 | 2.32E-07             | 158             |

|               |      |          |          |       |
|---------------|------|----------|----------|-------|
| miR-103a-3p   | -1.7 | 1.95E-08 | 2.63E-07 | 5337  |
| miR-98-5p     | -1.6 | 2.16E-08 | 2.82E-07 | 174   |
| let-7i-5p     | -1.4 | 2.29E-08 | 2.92E-07 | 21241 |
| miR-197-3p    | -2.1 | 2.60E-08 | 3.21E-07 | 375   |
| miR-1301-3p   | -2.8 | 2.86E-08 | 3.45E-07 | 46    |
| miR-125b-5p   | 2.0  | 3.51E-08 | 4.12E-07 | 899   |
| miR-339-5p    | -2.4 | 5.74E-08 | 6.58E-07 | 191   |
| miR-125b-2-3p | 3.6  | 6.46E-08 | 7.21E-07 | 10    |
| miR-26b-5p    | -1.5 | 7.87E-08 | 8.58E-07 | 4744  |
| miR-6803-3p   | -2.0 | 8.60E-08 | 9.16E-07 | 21    |
| miR-744-5p    | -2.1 | 1.43E-07 | 1.49E-06 | 384   |
| miR-1         | 3.4  | 1.55E-07 | 1.58E-06 | 296   |
| miR-23b-3p    | 1.5  | 1.78E-07 | 1.76E-06 | 116   |
| miR-374a-5p   | -1.8 | 1.81E-07 | 1.76E-06 | 118   |
| miR-30d-5p    | -1.7 | 1.93E-07 | 1.84E-06 | 16794 |
| miR-125b-1-3p | 6.3  | 2.98E-07 | 2.78E-06 | 4     |
| miR-1307-3p   | -1.9 | 3.30E-07 | 3.03E-06 | 1047  |
| miR-335-3p    | -2.6 | 4.06E-07 | 3.65E-06 | 24    |
| miR-874-3p    | 1.9  | 5.28E-07 | 4.65E-06 | 23    |
| miR-100-5p    | 2.3  | 5.54E-07 | 4.79E-06 | 132   |
| miR-148a-3p   | 1.5  | 5.72E-07 | 4.85E-06 | 3030  |
| miR-122-5p    | 3.1  | 6.56E-07 | 5.42E-06 | 30458 |
| miR-99b-5p    | -2.0 | 6.63E-07 | 5.42E-06 | 437   |
| miR-885-3p    | 4.1  | 6.85E-07 | 5.51E-06 | 34    |
| miR-27a-3p    | 1.4  | 7.43E-07 | 5.87E-06 | 160   |
| miR-1229-3p   | -2.6 | 1.43E-06 | 1.11E-05 | 10    |
| miR-130b-3p   | 1.8  | 1.51E-06 | 1.16E-05 | 34    |
| miR-1273h-3p  | -2.7 | 1.64E-06 | 1.23E-05 | 15    |
| miR-485-3p    | -3.1 | 1.72E-06 | 1.27E-05 | 136   |
| miR-365a-3p   | 2.8  | 2.21E-06 | 1.58E-05 | 9     |
| miR-409-3p    | -2.8 | 2.21E-06 | 1.58E-05 | 654   |
| miR-21-5p     | 1.4  | 2.26E-06 | 1.59E-05 | 18833 |
| miR-3620-3p   | -4.4 | 2.45E-06 | 1.70E-05 | 4     |
| miR-485-5p    | -2.8 | 2.56E-06 | 1.75E-05 | 73    |
| miR-543       | -3.1 | 2.65E-06 | 1.79E-05 | 6     |
| miR-1246      | 2.0  | 2.84E-06 | 1.88E-05 | 25    |
| miR-1908-5p   | -1.9 | 2.87E-06 | 1.88E-05 | 67    |
| miR-6842-3p   | -2.3 | 3.32E-06 | 2.14E-05 | 9     |
| miR-192-5p    | 1.7  | 3.75E-06 | 2.38E-05 | 730   |
| miR-652-3p    | -1.7 | 6.26E-06 | 3.90E-05 | 45    |
| miR-378i      | 2.2  | 6.30E-06 | 3.90E-05 | 7     |

|              |      |          |          |       |
|--------------|------|----------|----------|-------|
| miR-4446-3p  | -2.8 | 6.57E-06 | 4.01E-05 | 21    |
| miR-548j-5p  | -2.2 | 8.20E-06 | 4.94E-05 | 46    |
| miR-6747-3p  | -2.2 | 8.31E-06 | 4.94E-05 | 8     |
| miR-215-5p   | 2.6  | 8.41E-06 | 4.94E-05 | 54    |
| miR-10a-5p   | 1.5  | 9.16E-06 | 5.31E-05 | 752   |
| miR-326      | -2.6 | 9.37E-06 | 5.36E-05 | 39    |
| miR-122-3p   | 4.6  | 9.81E-06 | 5.55E-05 | 4     |
| miR-4433-5p  | -2.8 | 1.20E-05 | 6.69E-05 | 6     |
| miR-5193     | -3.3 | 1.21E-05 | 6.70E-05 | 5     |
| miR-30a-3p   | 1.7  | 1.28E-05 | 6.98E-05 | 43    |
| miR-493-5p   | -2.8 | 1.41E-05 | 7.61E-05 | 21    |
| miR-6721-5p  | -2.8 | 1.69E-05 | 8.99E-05 | 11    |
| miR-889-3p   | -2.9 | 1.88E-05 | 9.92E-05 | 30    |
| miR-151a-3p  | -1.7 | 2.18E-05 | 1.14E-04 | 2627  |
| miR-432-5p   | -2.5 | 2.60E-05 | 1.34E-04 | 736   |
| miR-454-3p   | -1.8 | 2.69E-05 | 1.37E-04 | 126   |
| miR-27b-3p   | 1.5  | 3.20E-05 | 1.61E-04 | 588   |
| miR-6741-3p  | -2.0 | 3.24E-05 | 1.61E-04 | 14    |
| miR-126-3p   | -1.5 | 3.63E-05 | 1.79E-04 | 12027 |
| miR-379-5p   | -2.4 | 3.82E-05 | 1.86E-04 | 85    |
| miR-1277-5p  | -2.1 | 3.92E-05 | 1.87E-04 | 18    |
| miR-500a-3p  | 1.6  | 3.95E-05 | 1.87E-04 | 30    |
| miR-671-3p   | -2.3 | 3.97E-05 | 1.87E-04 | 24    |
| miR-5698     | -4.2 | 4.21E-05 | 1.97E-04 | 5     |
| miR-331-3p   | -2.1 | 4.28E-05 | 1.98E-04 | 12    |
| miR-625-3p   | -2.0 | 4.48E-05 | 2.05E-04 | 471   |
| miR-10b-3p   | 2.5  | 4.63E-05 | 2.10E-04 | 6     |
| miR-1249     | -2.2 | 5.69E-05 | 2.56E-04 | 17    |
| miR-3065-5p  | 2.7  | 6.32E-05 | 2.79E-04 | 6     |
| miR-26a-5p   | -1.3 | 6.34E-05 | 2.79E-04 | 5364  |
| miR-1304-3p  | -2.0 | 6.68E-05 | 2.91E-04 | 19    |
| miR-374b-5p  | -1.6 | 6.74E-05 | 2.91E-04 | 28    |
| miR-654-3p   | -2.4 | 7.06E-05 | 3.02E-04 | 68    |
| miR-320a     | 1.4  | 7.83E-05 | 3.32E-04 | 1742  |
| miR-4429     | 2.5  | 8.75E-05 | 3.65E-04 | 5     |
| miR-92b-5p   | -1.6 | 8.77E-05 | 3.65E-04 | 41    |
| miR-1296-5p  | -2.4 | 9.09E-05 | 3.75E-04 | 8     |
| miR-182-5p   | -1.7 | 1.02E-04 | 4.12E-04 | 1298  |
| miR-664a-3p  | -2.1 | 1.02E-04 | 4.12E-04 | 12    |
| miR-4433b-3p | -3.7 | 1.02E-04 | 4.12E-04 | 34    |
| miR-483-3p   | 2.1  | 1.04E-04 | 4.16E-04 | 177   |

|             |      |          |          |      |
|-------------|------|----------|----------|------|
| miR-590-3p  | -1.7 | 1.09E-04 | 4.32E-04 | 17   |
| miR-369-5p  | -2.4 | 1.20E-04 | 4.68E-04 | 28   |
| miR-141-3p  | 2.2  | 1.27E-04 | 4.95E-04 | 37   |
| miR-323a-3p | -2.2 | 1.36E-04 | 5.24E-04 | 31   |
| miR-223-3p  | -1.8 | 1.37E-04 | 5.25E-04 | 8005 |
| miR-6852-5p | -2.2 | 1.46E-04 | 5.53E-04 | 33   |
| miR-1179    | -2.1 | 1.54E-04 | 5.78E-04 | 6    |
| miR-411-5p  | -2.4 | 1.59E-04 | 5.93E-04 | 20   |
| miR-3138    | -2.1 | 1.70E-04 | 6.30E-04 | 10   |
| miR-1260b   | -2.2 | 1.85E-04 | 6.78E-04 | 13   |
| miR-381-3p  | -2.3 | 1.90E-04 | 6.91E-04 | 54   |
| miR-628-3p  | -1.6 | 1.95E-04 | 7.03E-04 | 76   |
| miR-185-3p  | -1.5 | 2.13E-04 | 7.63E-04 | 79   |
| miR-4685-3p | -1.8 | 2.37E-04 | 8.42E-04 | 9    |
| miR-365b-3p | 2.3  | 2.55E-04 | 8.97E-04 | 8    |
| miR-17-5p   | -1.5 | 2.76E-04 | 9.66E-04 | 142  |
| miR-382-5p  | -2.1 | 2.81E-04 | 9.74E-04 | 402  |
| miR-211-5p  | 2.5  | 2.94E-04 | 1.01E-03 | 5    |
| miR-199a-5p | -2.1 | 2.98E-04 | 1.02E-03 | 25   |
| miR-181d-5p | -1.9 | 3.05E-04 | 1.03E-03 | 19   |
| miR-32-5p   | 1.7  | 3.35E-04 | 1.13E-03 | 402  |
| miR-324-5p  | -1.6 | 3.40E-04 | 1.13E-03 | 108  |
| let-7g-5p   | -1.4 | 3.42E-04 | 1.13E-03 | 1689 |
| miR-10a-3p  | 2.4  | 3.63E-04 | 1.20E-03 | 6    |
| miR-5187-5p | -2.0 | 3.83E-04 | 1.25E-03 | 9    |
| miR-28-3p   | -1.6 | 4.20E-04 | 1.36E-03 | 454  |
| miR-151a-5p | -1.6 | 4.47E-04 | 1.43E-03 | 24   |
| miR-766-3p  | -2.6 | 4.47E-04 | 1.43E-03 | 10   |
| miR-130b-5p | -1.9 | 4.49E-04 | 1.43E-03 | 14   |
| miR-431-5p  | -2.2 | 4.74E-04 | 1.50E-03 | 112  |
| miR-133a-3p | 2.5  | 5.46E-04 | 1.71E-03 | 47   |
| miR-877-3p  | -2.1 | 5.74E-04 | 1.79E-03 | 7    |
| miR-200b-3p | 2.2  | 5.79E-04 | 1.79E-03 | 23   |
| miR-181c-5p | -1.8 | 6.18E-04 | 1.89E-03 | 11   |
| miR-491-5p  | -2.0 | 6.21E-04 | 1.89E-03 | 15   |
| miR-181c-3p | -2.2 | 6.24E-04 | 1.89E-03 | 9    |
| miR-107     | 1.5  | 6.52E-04 | 1.97E-03 | 328  |
| miR-196a-5p | 2.3  | 6.81E-04 | 2.04E-03 | 11   |
| miR-4742-3p | -1.6 | 6.98E-04 | 2.07E-03 | 14   |
| miR-128-3p  | -1.3 | 7.01E-04 | 2.07E-03 | 364  |
| miR-1226-3p | -1.8 | 7.12E-04 | 2.09E-03 | 12   |

|              |      |          |          |       |
|--------------|------|----------|----------|-------|
| miR-191-5p   | -1.4 | 7.54E-04 | 2.20E-03 | 3984  |
| miR-425-3p   | -1.4 | 8.07E-04 | 2.34E-03 | 87    |
| let-7f-5p    | -1.3 | 8.27E-04 | 2.38E-03 | 17925 |
| miR-556-3p   | -2.8 | 8.84E-04 | 2.53E-03 | 4     |
| miR-424-5p   | 1.8  | 9.05E-04 | 2.57E-03 | 9     |
| miR-3591-5p  | 4.0  | 9.51E-04 | 2.68E-03 | 3     |
| miR-365a-5p  | 3.8  | 9.55E-04 | 2.68E-03 | 4     |
| miR-143-5p   | 1.9  | 9.84E-04 | 2.75E-03 | 11    |
| miR-143-3p   | 1.6  | 1.07E-03 | 2.97E-03 | 1159  |
| miR-210-3p   | 1.8  | 1.09E-03 | 2.99E-03 | 16    |
| miR-497-5p   | 2.2  | 1.17E-03 | 3.22E-03 | 5     |
| miR-487b-5p  | -2.4 | 1.24E-03 | 3.39E-03 | 5     |
| miR-199b-3p  | -1.6 | 1.34E-03 | 3.63E-03 | 1572  |
| miR-425-5p   | -1.4 | 1.40E-03 | 3.77E-03 | 4999  |
| miR-31-5p    | 3.4  | 1.41E-03 | 3.78E-03 | 6     |
| miR-26a-1-3p | -2.1 | 1.45E-03 | 3.83E-03 | 7     |
| miR-155-5p   | -1.3 | 1.45E-03 | 3.83E-03 | 414   |
| miR-190a-5p  | -1.7 | 1.66E-03 | 4.36E-03 | 128   |
| miR-4428     | 3.6  | 1.71E-03 | 4.48E-03 | 2     |
| miR-140-3p   | 1.4  | 1.73E-03 | 4.48E-03 | 781   |
| miR-221-3p   | -1.4 | 1.73E-03 | 4.48E-03 | 1500  |
| miR-4750-5p  | -2.5 | 1.75E-03 | 4.50E-03 | 4     |
| miR-676-3p   | 2.7  | 1.79E-03 | 4.58E-03 | 3     |
| miR-370-3p   | -2.1 | 1.83E-03 | 4.66E-03 | 47    |
| miR-199a-3p  | -1.6 | 1.90E-03 | 4.81E-03 | 1964  |
| miR-628-5p   | -1.9 | 1.95E-03 | 4.90E-03 | 17    |
| miR-6807-5p  | 3.4  | 1.97E-03 | 4.92E-03 | 3     |
| miR-150-3p   | 1.7  | 1.98E-03 | 4.92E-03 | 16    |
| miR-7110-3p  | -2.6 | 2.13E-03 | 5.27E-03 | 4     |
| miR-19b-3p   | 1.4  | 2.19E-03 | 5.39E-03 | 467   |
| miR-493-3p   | -2.1 | 2.27E-03 | 5.56E-03 | 12    |
| miR-301a-3p  | -1.6 | 2.29E-03 | 5.58E-03 | 20    |
| miR-323b-3p  | -2.0 | 2.42E-03 | 5.86E-03 | 44    |
| miR-92b-3p   | -1.4 | 2.66E-03 | 6.42E-03 | 564   |
| miR-139-3p   | -1.6 | 2.71E-03 | 6.50E-03 | 214   |
| miR-200a-3p  | 1.9  | 2.77E-03 | 6.60E-03 | 25    |
| miR-330-3p   | -2.2 | 2.97E-03 | 7.05E-03 | 8     |
| miR-3940-3p  | -1.8 | 3.14E-03 | 7.41E-03 | 8     |
| miR-329-3p   | -2.1 | 3.32E-03 | 7.79E-03 | 8     |
| miR-30b-5p   | -1.5 | 3.43E-03 | 8.02E-03 | 17    |
| miR-1260a    | -1.8 | 3.46E-03 | 8.05E-03 | 10    |

|               |      |          |          |      |
|---------------|------|----------|----------|------|
| miR-4667-5p   | 3.5  | 3.53E-03 | 8.16E-03 | 3    |
| miR-6515-3p   | -1.9 | 3.60E-03 | 8.29E-03 | 5    |
| miR-452-5p    | 2.0  | 3.66E-03 | 8.38E-03 | 8    |
| miR-28-5p     | -2.0 | 3.76E-03 | 8.56E-03 | 5    |
| miR-409-5p    | -2.2 | 3.95E-03 | 8.95E-03 | 6    |
| miR-501-3p    | 1.3  | 4.04E-03 | 9.09E-03 | 168  |
| miR-134-5p    | -1.8 | 4.06E-03 | 9.09E-03 | 206  |
| miR-4732-5p   | 1.4  | 4.07E-03 | 9.09E-03 | 207  |
| miR-433-3p    | -2.5 | 4.28E-03 | 9.51E-03 | 4    |
| miR-214-3p    | 2.1  | 4.34E-03 | 9.59E-03 | 5    |
| miR-126-5p    | -1.3 | 4.35E-03 | 9.59E-03 | 3778 |
| miR-191-3p    | -1.7 | 4.47E-03 | 9.80E-03 | 16   |
| miR-296-5p    | -1.5 | 4.57E-03 | 9.97E-03 | 27   |
| miR-4533      | -2.6 | 4.74E-03 | 1.03E-02 | 4    |
| miR-532-5p    | 1.3  | 5.03E-03 | 1.09E-02 | 245  |
| miR-148b-3p   | -1.3 | 5.08E-03 | 1.09E-02 | 871  |
| miR-340-5p    | -1.4 | 5.23E-03 | 1.12E-02 | 201  |
| miR-6881-3p   | -1.8 | 5.31E-03 | 1.13E-02 | 6    |
| miR-885-5p    | 2.1  | 5.33E-03 | 1.13E-02 | 12   |
| miR-6730-3p   | 3.6  | 5.34E-03 | 1.13E-02 | 3    |
| miR-185-5p    | 1.4  | 5.54E-03 | 1.16E-02 | 2589 |
| miR-18a-3p    | -1.4 | 5.54E-03 | 1.16E-02 | 45   |
| miR-342-5p    | -1.7 | 6.13E-03 | 1.27E-02 | 5    |
| miR-15b-5p    | 1.4  | 6.13E-03 | 1.27E-02 | 556  |
| miR-205-5p    | 1.5  | 6.15E-03 | 1.27E-02 | 70   |
| miR-369-3p    | -1.8 | 6.20E-03 | 1.27E-02 | 25   |
| miR-223-5p    | -1.4 | 6.22E-03 | 1.27E-02 | 400  |
| miR-502-3p    | 1.4  | 6.93E-03 | 1.41E-02 | 37   |
| miR-146a-5p   | -1.4 | 7.60E-03 | 1.54E-02 | 5306 |
| miR-148b-5p   | -1.5 | 7.69E-03 | 1.55E-02 | 15   |
| miR-15a-5p    | 1.4  | 7.80E-03 | 1.57E-02 | 489  |
| let-7d-3p     | -1.3 | 9.53E-03 | 1.91E-02 | 314  |
| miR-378a-5p   | 1.6  | 9.94E-03 | 1.98E-02 | 10   |
| miR-18a-5p    | -1.4 | 9.97E-03 | 1.98E-02 | 30   |
| miR-339-3p    | -1.3 | 1.01E-02 | 1.99E-02 | 42   |
| miR-27a-5p    | 2.0  | 1.04E-02 | 2.04E-02 | 4    |
| miR-5189-5p   | -2.0 | 1.06E-02 | 2.07E-02 | 4    |
| miR-941       | -1.4 | 1.16E-02 | 2.26E-02 | 159  |
| miR-542-3p    | 1.5  | 1.25E-02 | 2.42E-02 | 16   |
| miR-181a-2-3p | -1.4 | 1.25E-02 | 2.42E-02 | 44   |
| miR-4665-5p   | -1.8 | 1.40E-02 | 2.69E-02 | 5    |



|              |      |          |          |        |
|--------------|------|----------|----------|--------|
| miR-150-5p   | 1.5  | 1.40E-02 | 2.69E-02 | 2090   |
| miR-1343-3p  | -1.5 | 1.45E-02 | 2.77E-02 | 9      |
| miR-96-5p    | 1.5  | 1.49E-02 | 2.83E-02 | 113    |
| miR-92a-3p   | -1.3 | 1.50E-02 | 2.83E-02 | 140962 |
| miR-660-5p   | 1.2  | 1.64E-02 | 3.08E-02 | 407    |
| miR-374a-3p  | -1.5 | 1.64E-02 | 3.08E-02 | 13     |
| miR-1538     | -1.8 | 1.67E-02 | 3.13E-02 | 6      |
| miR-4513     | -5.6 | 1.85E-02 | 3.44E-02 | 4      |
| miR-6805-5p  | -1.6 | 1.88E-02 | 3.47E-02 | 7      |
| miR-181a-3p  | -1.5 | 1.88E-02 | 3.47E-02 | 30     |
| miR-671-5p   | -1.4 | 1.91E-02 | 3.52E-02 | 64     |
| miR-142-5p   | 1.2  | 2.26E-02 | 4.15E-02 | 2247   |
| miR-22-3p    | 1.3  | 2.28E-02 | 4.15E-02 | 584    |
| miR-342-3p   | -1.3 | 2.39E-02 | 4.34E-02 | 3780   |
| miR-3200-5p  | -1.6 | 2.44E-02 | 4.41E-02 | 6      |
| let-7c-5p    | 1.2  | 2.50E-02 | 4.51E-02 | 654    |
| miR-6511a-3p | -1.5 | 2.54E-02 | 4.55E-02 | 9      |
| miR-3934-5p  | 2.7  | 2.54E-02 | 4.55E-02 | 3      |
| miR-4714-3p  | 1.9  | 2.61E-02 | 4.66E-02 | 4      |
| miR-200c-3p  | 1.4  | 2.67E-02 | 4.73E-02 | 73     |
| miR-127-5p   | -1.9 | 2.68E-02 | 4.74E-02 | 5      |
| miR-636      | -1.3 | 2.90E-02 | 5.11E-02 | 17     |
| miR-190b     | 1.3  | 3.04E-02 | 5.34E-02 | 26     |
| miR-2355-3p  | -1.7 | 3.11E-02 | 5.44E-02 | 7      |
| miR-376a-3p  | -1.7 | 3.22E-02 | 5.62E-02 | 8      |
| miR-146b-5p  | -1.3 | 3.27E-02 | 5.68E-02 | 369    |
| let-7b-3p    | 1.4  | 3.41E-02 | 5.89E-02 | 15     |
| miR-183-5p   | -1.3 | 3.45E-02 | 5.94E-02 | 610    |
| miR-532-3p   | 1.3  | 4.00E-02 | 6.85E-02 | 48     |
| miR-6741-5p  | -1.5 | 4.01E-02 | 6.85E-02 | 6      |
| miR-7976     | -1.4 | 4.12E-02 | 7.01E-02 | 10     |
| miR-1237-3p  | -1.6 | 4.19E-02 | 7.10E-02 | 7      |
| miR-132-3p   | 1.3  | 4.29E-02 | 7.26E-02 | 39     |
| miR-154-5p   | -1.7 | 4.41E-02 | 7.43E-02 | 4      |
| miR-222-3p   | 1.2  | 4.58E-02 | 7.68E-02 | 98     |
| miR-29b-3p   | 1.2  | 4.63E-02 | 7.74E-02 | 133    |
| miR-3177-3p  | -1.5 | 4.86E-02 | 8.10E-02 | 8      |
| miR-486-5p   | -1.3 | 4.95E-02 | 8.21E-02 | 242014 |
| miR-574-3p   | 1.3  | 5.01E-02 | 8.28E-02 | 61     |
| miR-3605-5p  | 1.5  | 5.02E-02 | 8.28E-02 | 6      |
| miR-29c-5p   | -1.3 | 5.26E-02 | 8.63E-02 | 12     |

|             |      |          |          |       |
|-------------|------|----------|----------|-------|
| miR-129-5p  | 1.7  | 5.33E-02 | 8.71E-02 | 5     |
| miR-6767-5p | 1.6  | 5.34E-02 | 8.71E-02 | 5     |
| miR-6734-5p | 1.7  | 5.70E-02 | 9.26E-02 | 5     |
| miR-19a-3p  | 1.2  | 5.77E-02 | 9.33E-02 | 122   |
| miR-18b-3p  | -1.5 | 5.85E-02 | 9.43E-02 | 6     |
| miR-204-5p  | 1.4  | 5.95E-02 | 9.56E-02 | 10    |
| miR-337-5p  | -1.7 | 6.18E-02 | 9.90E-02 | 5     |
| miR-3064-5p | -1.5 | 6.38E-02 | 1.02E-01 | 4     |
| miR-125a-5p | -1.2 | 6.40E-02 | 1.02E-01 | 2302  |
| miR-30d-3p  | -1.4 | 6.55E-02 | 1.04E-01 | 6     |
| miR-3198    | -1.6 | 6.60E-02 | 1.04E-01 | 5     |
| miR-1299    | 2.0  | 6.63E-02 | 1.04E-01 | 16    |
| miR-2116-3p | 1.5  | 6.80E-02 | 1.07E-01 | 5     |
| miR-9-3p    | 1.8  | 6.94E-02 | 1.09E-01 | 4     |
| miR-1292-5p | -1.3 | 6.99E-02 | 1.09E-01 | 9     |
| miR-6514-5p | -1.4 | 7.56E-02 | 1.17E-01 | 5     |
| miR-376c-3p | -1.7 | 7.69E-02 | 1.19E-01 | 8     |
| miR-548d-5p | 1.4  | 7.71E-02 | 1.19E-01 | 13    |
| miR-93-3p   | -1.2 | 7.85E-02 | 1.21E-01 | 34    |
| miR-421     | 1.2  | 8.11E-02 | 1.24E-01 | 40    |
| miR-145-5p  | 1.3  | 8.51E-02 | 1.30E-01 | 18    |
| miR-148a-5p | -1.5 | 8.63E-02 | 1.31E-01 | 8     |
| miR-664a-5p | -1.2 | 8.71E-02 | 1.32E-01 | 133   |
| miR-130a-3p | 1.2  | 8.81E-02 | 1.33E-01 | 65    |
| miR-99b-3p  | -1.5 | 9.39E-02 | 1.42E-01 | 9     |
| miR-625-5p  | -1.4 | 9.44E-02 | 1.42E-01 | 8     |
| miR-181a-5p | -1.2 | 9.50E-02 | 1.42E-01 | 1450  |
| miR-450b-5p | 1.4  | 9.65E-02 | 1.44E-01 | 9     |
| miR-24-3p   | -1.2 | 9.74E-02 | 1.45E-01 | 604   |
| let-7a-5p   | -1.2 | 9.84E-02 | 1.46E-01 | 29100 |
| miR-20b-5p  | 1.2  | 9.85E-02 | 1.46E-01 | 194   |
| miR-3682-3p | 1.6  | 9.93E-02 | 1.46E-01 | 4     |
| miR-451a    | 1.2  | 9.98E-02 | 1.46E-01 | 16308 |
| miR-495-3p  | -1.6 | 1.00E-01 | 1.46E-01 | 5     |
| miR-4435    | -1.7 | 1.00E-01 | 1.46E-01 | 4     |
| miR-3187-3p | 1.2  | 1.01E-01 | 1.47E-01 | 21    |
| miR-769-5p  | -1.2 | 1.04E-01 | 1.51E-01 | 28    |
| miR-144-5p  | 1.3  | 1.05E-01 | 1.52E-01 | 166   |
| miR-382-3p  | -1.4 | 1.06E-01 | 1.53E-01 | 15    |
| miR-6796-5p | 2.0  | 1.07E-01 | 1.54E-01 | 3     |
| miR-431-3p  | -1.6 | 1.08E-01 | 1.55E-01 | 4     |

|              |      |          |          |      |
|--------------|------|----------|----------|------|
| miR-4467     | -1.7 | 1.09E-01 | 1.55E-01 | 4    |
| miR-1976     | -1.2 | 1.10E-01 | 1.57E-01 | 45   |
| miR-627-5p   | 1.5  | 1.11E-01 | 1.57E-01 | 6    |
| miR-136-5p   | -1.5 | 1.13E-01 | 1.59E-01 | 5    |
| miR-3173-5p  | -1.2 | 1.13E-01 | 1.59E-01 | 23   |
| miR-664b-5p  | -1.4 | 1.14E-01 | 1.60E-01 | 12   |
| miR-942-5p   | -1.2 | 1.14E-01 | 1.60E-01 | 74   |
| miR-487b-3p  | -1.5 | 1.17E-01 | 1.63E-01 | 9    |
| miR-125a-3p  | 1.5  | 1.36E-01 | 1.90E-01 | 4    |
| miR-6511b-3p | -1.3 | 1.37E-01 | 1.90E-01 | 9    |
| miR-1180-3p  | -1.2 | 1.39E-01 | 1.92E-01 | 175  |
| miR-145-3p   | 1.6  | 1.40E-01 | 1.93E-01 | 4    |
| miR-338-3p   | -1.3 | 1.47E-01 | 2.03E-01 | 18   |
| miR-106a-5p  | -1.2 | 1.49E-01 | 2.05E-01 | 10   |
| miR-361-3p   | -1.2 | 1.51E-01 | 2.06E-01 | 369  |
| miR-140-5p   | -1.1 | 1.56E-01 | 2.12E-01 | 48   |
| miR-3679-5p  | 1.4  | 1.58E-01 | 2.15E-01 | 6    |
| miR-486-3p   | -1.2 | 1.68E-01 | 2.28E-01 | 93   |
| miR-17-3p    | 1.3  | 1.74E-01 | 2.34E-01 | 9    |
| miR-1250-5p  | -1.7 | 1.77E-01 | 2.39E-01 | 3    |
| miR-377-3p   | -1.4 | 1.81E-01 | 2.43E-01 | 5    |
| miR-1294     | 1.2  | 1.88E-01 | 2.51E-01 | 61   |
| miR-642a-5p  | 1.5  | 1.93E-01 | 2.57E-01 | 4    |
| miR-146a-3p  | -1.7 | 1.93E-01 | 2.57E-01 | 4    |
| miR-494-3p   | -1.4 | 1.95E-01 | 2.59E-01 | 12   |
| miR-5189-3p  | -1.4 | 2.08E-01 | 2.75E-01 | 6    |
| miR-7-5p     | 1.2  | 2.16E-01 | 2.85E-01 | 588  |
| miR-22-5p    | 1.2  | 2.27E-01 | 2.99E-01 | 8    |
| miR-7706     | -1.2 | 2.33E-01 | 3.06E-01 | 16   |
| miR-93-5p    | -1.1 | 2.35E-01 | 3.08E-01 | 7639 |
| miR-7151-3p  | -1.5 | 2.38E-01 | 3.11E-01 | 5    |
| miR-454-5p   | -1.2 | 2.42E-01 | 3.14E-01 | 21   |
| miR-23a-3p   | -1.1 | 2.43E-01 | 3.15E-01 | 820  |
| miR-6786-3p  | -1.2 | 2.43E-01 | 3.15E-01 | 7    |
| miR-30c-5p   | 1.1  | 2.47E-01 | 3.19E-01 | 57   |
| miR-335-5p   | 1.2  | 2.48E-01 | 3.20E-01 | 345  |
| miR-576-5p   | -1.1 | 2.49E-01 | 3.20E-01 | 177  |
| miR-6793-5p  | 1.4  | 2.51E-01 | 3.21E-01 | 4    |
| miR-484      | -1.2 | 2.53E-01 | 3.23E-01 | 2367 |
| let-7a-3p    | 1.3  | 2.62E-01 | 3.33E-01 | 7    |
| miR-106b-3p  | -1.1 | 2.76E-01 | 3.50E-01 | 593  |

|              |      |          |          |       |
|--------------|------|----------|----------|-------|
| miR-106b-5p  | -1.2 | 2.77E-01 | 3.50E-01 | 26    |
| miR-9-5p     | 1.4  | 2.92E-01 | 3.69E-01 | 9     |
| miR-15b-3p   | 1.2  | 2.93E-01 | 3.69E-01 | 34    |
| miR-503-5p   | 1.2  | 3.12E-01 | 3.92E-01 | 34    |
| miR-4732-3p  | -1.1 | 3.13E-01 | 3.92E-01 | 217   |
| miR-7-1-3p   | 1.2  | 3.22E-01 | 4.01E-01 | 5     |
| miR-1224-5p  | -1.3 | 3.22E-01 | 4.01E-01 | 10    |
| miR-3928-3p  | -1.2 | 3.35E-01 | 4.15E-01 | 6     |
| miR-3615     | 1.1  | 3.42E-01 | 4.23E-01 | 682   |
| miR-142-3p   | 1.1  | 3.48E-01 | 4.30E-01 | 1526  |
| miR-16-2-3p  | 1.1  | 3.51E-01 | 4.32E-01 | 30    |
| miR-548l     | -1.2 | 3.53E-01 | 4.33E-01 | 9     |
| miR-202-3p   | 1.4  | 3.57E-01 | 4.38E-01 | 5     |
| miR-4775     | -1.1 | 3.59E-01 | 4.39E-01 | 4     |
| miR-3613-5p  | -1.1 | 3.62E-01 | 4.41E-01 | 391   |
| miR-4662a-5p | -1.3 | 3.65E-01 | 4.43E-01 | 5     |
| miR-3158-3p  | -1.2 | 3.73E-01 | 4.52E-01 | 15    |
| miR-33a-5p   | 1.2  | 3.78E-01 | 4.57E-01 | 7     |
| miR-136-3p   | -1.2 | 3.90E-01 | 4.70E-01 | 10    |
| miR-139-5p   | -1.2 | 4.00E-01 | 4.81E-01 | 12    |
| miR-4669     | 1.4  | 4.10E-01 | 4.91E-01 | 7     |
| miR-330-5p   | 1.3  | 4.12E-01 | 4.93E-01 | 3     |
| miR-1247-5p  | 1.2  | 4.14E-01 | 4.94E-01 | 9     |
| miR-3913-5p  | 1.1  | 4.19E-01 | 4.99E-01 | 10    |
| miR-5001-3p  | 1.2  | 4.43E-01 | 5.26E-01 | 7     |
| miR-345-5p   | 1.1  | 4.48E-01 | 5.31E-01 | 25    |
| miR-760      | -1.1 | 4.60E-01 | 5.42E-01 | 30    |
| miR-505-5p   | -1.1 | 4.64E-01 | 5.47E-01 | 13    |
| miR-548n     | -1.2 | 4.66E-01 | 5.47E-01 | 5     |
| miR-4738-3p  | 1.2  | 4.71E-01 | 5.51E-01 | 5     |
| miR-324-3p   | -1.1 | 4.77E-01 | 5.57E-01 | 32    |
| let-7b-5p    | 1.1  | 5.01E-01 | 5.84E-01 | 31199 |
| miR-6859-5p  | 1.2  | 5.06E-01 | 5.88E-01 | 4     |
| miR-423-5p   | 1.1  | 5.10E-01 | 5.91E-01 | 7124  |
| miR-186-5p   | -1.1 | 5.11E-01 | 5.91E-01 | 280   |
| miR-874-5p   | 1.3  | 5.14E-01 | 5.93E-01 | 3     |
| miR-589-5p   | -1.1 | 5.25E-01 | 6.04E-01 | 21    |
| miR-1468-5p  | -1.1 | 5.28E-01 | 6.06E-01 | 9     |
| miR-101-3p   | 1.1  | 5.37E-01 | 6.15E-01 | 4635  |
| miR-144-3p   | -1.1 | 5.43E-01 | 6.18E-01 | 213   |
| miR-598-3p   | -1.1 | 5.43E-01 | 6.18E-01 | 36    |

|              |      |          |          |        |
|--------------|------|----------|----------|--------|
| miR-3942-5p  | 1.3  | 5.59E-01 | 6.35E-01 | 3      |
| miR-25-3p    | 1.1  | 5.63E-01 | 6.38E-01 | 14035  |
| miR-5583-3p  | -1.1 | 5.71E-01 | 6.46E-01 | 5      |
| miR-429      | 1.2  | 5.79E-01 | 6.53E-01 | 5      |
| miR-152-3p   | -1.1 | 5.80E-01 | 6.53E-01 | 153    |
| miR-23a-5p   | -1.3 | 5.88E-01 | 6.60E-01 | 4      |
| miR-548at-5p | 1.2  | 5.91E-01 | 6.62E-01 | 6      |
| miR-3127-5p  | -1.1 | 5.95E-01 | 6.65E-01 | 7      |
| miR-21-3p    | -1.1 | 5.97E-01 | 6.66E-01 | 10     |
| miR-30e-5p   | 1.0  | 6.00E-01 | 6.67E-01 | 4305   |
| miR-5010-5p  | -1.0 | 6.44E-01 | 7.14E-01 | 8      |
| miR-548ay-5p | 1.1  | 6.46E-01 | 7.14E-01 | 14     |
| miR-2110     | -1.0 | 6.62E-01 | 7.29E-01 | 55     |
| miR-224-5p   | 1.1  | 6.64E-01 | 7.29E-01 | 20     |
| miR-26b-3p   | -1.1 | 6.64E-01 | 7.29E-01 | 8      |
| miR-375      | 1.1  | 6.65E-01 | 7.29E-01 | 419    |
| miR-363-3p   | 1.1  | 6.67E-01 | 7.29E-01 | 480    |
| miR-196b-5p  | 1.1  | 6.70E-01 | 7.31E-01 | 209    |
| miR-20a-5p   | -1.0 | 6.72E-01 | 7.31E-01 | 414    |
| miR-16-5p    | 1.1  | 6.88E-01 | 7.47E-01 | 317310 |
| miR-23b-5p   | -1.1 | 7.14E-01 | 7.73E-01 | 8      |
| miR-3688-3p  | 1.1  | 7.38E-01 | 7.97E-01 | 12     |
| miR-505-3p   | -1.1 | 7.54E-01 | 8.12E-01 | 9      |
| miR-4710     | -1.1 | 7.59E-01 | 8.14E-01 | 3      |
| miR-6764-5p  | 1.1  | 7.59E-01 | 8.14E-01 | 5      |
| miR-629-5p   | 1.0  | 7.66E-01 | 8.20E-01 | 207    |
| miR-1255b-5p | -1.0 | 7.69E-01 | 8.21E-01 | 44     |
| miR-5196-3p  | -1.2 | 7.74E-01 | 8.24E-01 | 5      |
| let-7d-5p    | 1.0  | 7.84E-01 | 8.34E-01 | 1747   |
| miR-6780a-5p | 1.1  | 7.92E-01 | 8.36E-01 | 5      |
| miR-132-5p   | -1.0 | 7.92E-01 | 8.36E-01 | 6      |
| miR-550a-3p  | -1.0 | 7.94E-01 | 8.36E-01 | 12     |
| miR-218-5p   | 1.1  | 7.94E-01 | 8.36E-01 | 6      |
| miR-199b-5p  | 1.1  | 8.12E-01 | 8.53E-01 | 7      |
| miR-1270     | 1.1  | 8.16E-01 | 8.55E-01 | 17     |
| let-7e-5p    | 1.0  | 8.27E-01 | 8.65E-01 | 200    |
| miR-769-3p   | -1.0 | 8.38E-01 | 8.74E-01 | 6      |
| miR-25-5p    | 1.0  | 8.43E-01 | 8.77E-01 | 38     |
| miR-3168     | 1.0  | 8.44E-01 | 8.77E-01 | 32     |
| miR-3200-3p  | 1.0  | 8.48E-01 | 8.77E-01 | 8      |
| miR-3150a-5p | -1.2 | 8.49E-01 | 8.77E-01 | 3      |

|                    |      |          |          |     |
|--------------------|------|----------|----------|-----|
| <b>miR-937-3p</b>  | 1.1  | 8.65E-01 | 8.92E-01 | 4   |
| <b>miR-6862-5p</b> | -1.0 | 8.77E-01 | 9.01E-01 | 4   |
| <b>miR-146b-3p</b> | -1.0 | 8.78E-01 | 9.01E-01 | 13  |
| <b>miR-181b-5p</b> | -1.0 | 8.80E-01 | 9.01E-01 | 190 |
| <b>miR-509-3p</b>  | -1.1 | 8.89E-01 | 9.09E-01 | 4   |
| <b>miR-3613-3p</b> | -1.0 | 8.95E-01 | 9.13E-01 | 5   |
| <b>miR-1287-5p</b> | -1.0 | 8.98E-01 | 9.14E-01 | 16  |
| <b>miR-1307-5p</b> | -1.0 | 9.15E-01 | 9.30E-01 | 20  |
| <b>miR-501-5p</b>  | 1.0  | 9.34E-01 | 9.47E-01 | 6   |
| <b>miR-548a-3p</b> | 1.0  | 9.39E-01 | 9.50E-01 | 5   |
| <b>miR-361-5p</b>  | 1.0  | 9.45E-01 | 9.53E-01 | 243 |
| <b>miR-203a</b>    | 1.0  | 9.57E-01 | 9.63E-01 | 249 |
| <b>miR-3605-3p</b> | 1.0  | 9.78E-01 | 9.82E-01 | 38  |
| <b>miR-651-5p</b>  | 1.0  | 9.86E-01 | 9.89E-01 | 13  |
| <b>miR-3120-3p</b> | -1.0 | 1.00E+00 | 1.00E+00 | 4   |

**Table S4. Overlap in differentially altered miRs (p<0.05) between cohorts 1 and 2 in relation to a history of preeclampsia versus normotensive pregnancy.** MiRNA levels are expressed as mean counts per million mapped reads (CPM).

| 4 common miRNAs            | prior PE vs. NT pregnancy (ACS cohort 1) |          |                      |                 | prior PE vs. NT preg. (non-ACS cohort 2) |          |                      |                 |
|----------------------------|------------------------------------------|----------|----------------------|-----------------|------------------------------------------|----------|----------------------|-----------------|
|                            | Fold Change                              | p value  | FDR-adjusted p value | miR level (CPM) | Fold Change                              | p value  | FDR-adjusted p value | miR level (CPM) |
| miR-1299                   | 4.9                                      | 3.67E-03 | 1.96E-01             | 23              | 4.0                                      | 3.63E-03 | 2.37E-01             | 10              |
| miR-4662a-5p               | 3.5                                      | 1.33E-02 | 4.45E-01             | 5               | -2.0                                     | 9.21E-03 | 4.51E-01             | 4               |
| miR-376a-3p                | -4.7                                     | 1.10E-03 | 1.17E-01             | 7               | -1.6                                     | 3.50E-02 | 7.63E-01             | 8               |
| miR-206                    | -10.6                                    | 1.64E-06 | 6.98E-04             | 242             | -1.8                                     | 2.06E-02 | 6.21E-01             | 34              |
| 26 miRs unique to cohort 1 | prior PE vs. NT pregnancy (ACS cohort 1) |          |                      |                 | prior PE vs. NT preg. (non-ACS cohort 2) |          |                      |                 |
|                            | Fold Change                              | p value  | FDR-adjusted p value | miR level (CPM) | Fold Change                              | p value  | FDR-adjusted p value | miR level (CPM) |
| miR-184                    | 10.3                                     | 2.35E-04 | 3.35E-02             | 52              | na                                       | >0.05    | na                   | na              |
| miR-6730-3p                | 7.3                                      | 3.46E-03 | 1.96E-01             | 4               | na                                       | >0.05    | na                   | na              |
| miR-499a-5p                | 5.8                                      | 1.85E-03 | 1.58E-01             | 45              | na                                       | >0.05    | na                   | na              |
| miR-218-5p                 | 5.4                                      | 2.24E-03 | 1.60E-01             | 7               | na                                       | >0.05    | na                   | na              |
| miR-3591-5p                | 3.8                                      | 4.01E-02 | 6.34E-01             | 5               | na                                       | >0.05    | na                   | na              |
| miR-4667-5p                | 3.6                                      | 3.60E-02 | 5.91E-01             | 4               | na                                       | >0.05    | na                   | na              |
| miR-874-5p                 | 3.3                                      | 1.64E-02 | 4.54E-01             | 4               | na                                       | >0.05    | na                   | na              |
| miR-1                      | 3.0                                      | 5.46E-03 | 2.59E-01             | 531             | na                                       | >0.05    | na                   | na              |
| miR-202-3p                 | 2.9                                      | 4.68E-02 | 6.54E-01             | 6               | na                                       | >0.05    | na                   | na              |
| miR-133a-3p                | 2.7                                      | 2.78E-02 | 5.16E-01             | 76              | na                                       | >0.05    | na                   | na              |
| miR-6767-5p                | 2.7                                      | 1.95E-02 | 4.91E-01             | 7               | na                                       | >0.05    | na                   | na              |
| miR-6741-3p                | 1.7                                      | 2.61E-02 | 5.07E-01             | 11              | na                                       | >0.05    | na                   | na              |
| miR-769-5p                 | -1.5                                     | 4.20E-02 | 6.40E-01             | 27              | na                                       | >0.05    | na                   | na              |
| miR-30b-5p                 | -1.8                                     | 1.23E-02 | 4.45E-01             | 15              | na                                       | >0.05    | na                   | na              |
| miR-1277-5p                | -1.8                                     | 2.35E-02 | 5.01E-01             | 13              | na                                       | >0.05    | na                   | na              |
| miR-221-5p                 | -1.9                                     | 3.03E-02 | 5.39E-01             | 9               | na                                       | >0.05    | na                   | na              |
| miR-2355-3p                | -1.9                                     | 3.54E-02 | 5.91E-01             | 7               | na                                       | >0.05    | na                   | na              |
| miR-505-3p                 | -1.9                                     | 2.22E-02 | 5.01E-01             | 9               | na                                       | >0.05    | na                   | na              |
| miR-369-5p                 | -2.2                                     | 2.54E-02 | 5.07E-01             | 18              | na                                       | >0.05    | na                   | na              |
| miR-493-5p                 | -2.3                                     | 2.29E-02 | 5.01E-01             | 13              | na                                       | >0.05    | na                   | na              |
| miR-431-5p                 | -2.4                                     | 1.47E-02 | 4.49E-01             | 73              | na                                       | >0.05    | na                   | na              |
| miR-329-3p                 | -2.5                                     | 4.56E-02 | 6.54E-01             | 7               | na                                       | >0.05    | na                   | na              |
| miR-136-3p                 | -2.7                                     | 1.35E-02 | 4.45E-01             | 10              | na                                       | >0.05    | na                   | na              |
| miR-28-5p                  | -2.7                                     | 1.70E-02 | 4.54E-01             | 5               | na                                       | >0.05    | na                   | na              |
| miR-889-3p                 | -2.9                                     | 7.52E-03 | 3.21E-01             | 17              | na                                       | >0.05    | na                   | na              |
| miR-1292-5p                | -3.6                                     | 8.28E-05 | 1.77E-02             | 8               | na                                       | >0.05    | na                   | na              |
| 16 miRs unique to cohort 2 | prior PE vs. NT pregnancy (ACS cohort 1) |          |                      |                 | prior PE vs. NT preg. (non-ACS cohort 2) |          |                      |                 |
|                            | Fold Change                              | p value  | FDR-adjusted p value | miR level (CPM) | Fold Change                              | p value  | FDR-adjusted p value | miR level (CPM) |
| miR-1224-5p                | na                                       | >0.05    | na                   | na              | 2.1                                      | 3.8E-02  | 7.8E-01              | 10              |
| miR-877-3p                 | na                                       | >0.05    | na                   | na              | 1.6                                      | 2.3E-02  | 6.5E-01              | 8               |
| miR-22-3p                  | na                                       | >0.05    | na                   | na              | 1.3                                      | 3.5E-02  | 7.6E-01              | 506             |
| miR-30a-5p                 | na                                       | >0.05    | na                   | na              | -1.2                                     | 4.9E-02  | 9.2E-01              | 491             |
| miR-29a-3p                 | na                                       | >0.05    | na                   | na              | -1.4                                     | 2.0E-03  | 2.4E-01              | 449             |
| miR-125b-5p                | na                                       | >0.05    | na                   | na              | -1.5                                     | 3.1E-03  | 2.4E-01              | 603             |
| miR-99a-5p                 | na                                       | >0.05    | na                   | na              | -1.5                                     | 2.2E-03  | 2.4E-01              | 126             |
| miR-205-5p                 | na                                       | >0.05    | na                   | na              | -1.6                                     | 5.0E-03  | 2.8E-01              | 56              |
| miR-204-5p                 | na                                       | >0.05    | na                   | na              | -1.7                                     | 2.7E-02  | 7.0E-01              | 8               |
| miR-382-3p                 | na                                       | >0.05    | na                   | na              | -1.7                                     | 1.5E-02  | 5.3E-01              | 15              |
| miR-193b-5p                | na                                       | >0.05    | na                   | na              | -2.0                                     | 1.1E-02  | 4.8E-01              | 17              |
| miR-885-5p                 | na                                       | >0.05    | na                   | na              | -2.0                                     | 3.0E-02  | 7.2E-01              | 8               |
| miR-885-3p                 | na                                       | >0.05    | na                   | na              | -2.3                                     | 1.7E-02  | 5.7E-01              | 15              |
| miR-203a                   | na                                       | >0.05    | na                   | na              | -2.4                                     | 2.7E-03  | 2.4E-01              | 251             |
| miR-122-5p                 | na                                       | >0.05    | na                   | na              | -2.6                                     | 4.6E-04  | 1.8E-01              | 15405           |
| miR-9-5p                   | na                                       | >0.05    | na                   | na              | -2.9                                     | 1.4E-02  | 5.3E-01              | 8               |

**Table S5. Overlap in differentially altered miRs (p<0.05) identified in cohorts 1, 2 and 3 in relation to a history of PE or NT pregnancy (cohorts 1 and 2) or acute coronary syndrome (cohort 3). MiRNA levels are expressed as mean counts per million mapped reads (CPM).**

| 1 common miR              | prior PE vs. NT pregnancy (ACS cohort 1) |          |                      |                 | prior PE vs. NT preg. (non-ACS cohort 2) |          |                      |                 | ACS vs non-ACS (cohort 1 vs cohort 2) |          |                      |                 |       |
|---------------------------|------------------------------------------|----------|----------------------|-----------------|------------------------------------------|----------|----------------------|-----------------|---------------------------------------|----------|----------------------|-----------------|-------|
|                           | Fold Change                              | p value  | FDR-adjusted p value | miR level (CPM) | Fold Change                              | p value  | FDR-adjusted p value | miR level (CPM) | Fold Change                           | p value  | FDR-adjusted p value | miR level (CPM) |       |
| miR-206                   | -10.6                                    | 1.64E-06 | 6.98E-04             | 242             | -1.8                                     | 2.06E-02 | 6.21E-01             | 34              | 6.9                                   | 4.15E-10 | 8.65E-09             | 127             |       |
| 3 miR overlap             | prior PE vs. NT pregnancy (ACS cohort 1) |          |                      |                 | prior PE vs. NT preg. (non-ACS cohort 2) |          |                      |                 | ACS vs non-ACS (cohort 1 vs cohort 2) |          |                      |                 |       |
|                           | Fold Change                              | p value  | FDR-adjusted p value | miR level (CPM) | Fold Change                              | p value  | FDR-adjusted p value | miR level (CPM) | Fold Change                           | p value  | FDR-adjusted p value | miR level (CPM) |       |
|                           | miR-1299                                 | 4.9      | 3.67E-03             | 1.96E-01        | 23.5                                     | 4.0      | 3.63E-03             | 2.37E-01        | 10                                    | na       | >0.05                | na              | na    |
|                           | miR-4662a-5p                             | 3.5      | 1.33E-02             | 4.45E-01        | 5.0                                      | -2.0     | 9.21E-03             | 4.51E-01        | 4                                     | na       | >0.05                | na              | na    |
| miR-376a-3p               | -4.7                                     | 1.10E-03 | 1.17E-01             | 7.0             | -1.6                                     | 3.50E-02 | 7.63E-01             | 8               | na                                    | >0.05    | na                   | na              |       |
| 11 miR overlap            | prior PE vs. NT pregnancy (ACS cohort 1) |          |                      |                 | prior PE vs. NT preg. (non-ACS cohort 2) |          |                      |                 | ACS vs non-ACS (cohort 1 vs cohort 2) |          |                      |                 |       |
|                           | Fold Change                              | p value  | FDR-adjusted p value | miR level (CPM) | Fold Change                              | p value  | FDR-adjusted p value | miR level (CPM) | Fold Change                           | p value  | FDR-adjusted p value | miR level (CPM) |       |
|                           | miR-877-3p                               | na       | >0.05                | na              | na                                       | 1.6      | 2.32E-02             | 6.50E-01        | 8                                     | -2.1     | 5.74E-04             | 1.79E-03        | 7     |
|                           | miR-22-3p                                | na       | >0.05                | na              | na                                       | 1.3      | 3.47E-02             | 7.63E-01        | 506                                   | 1.3      | 2.28E-02             | 4.15E-02        | 584   |
|                           | miR-30a-5p                               | na       | >0.05                | na              | na                                       | -1.2     | 4.93E-02             | 9.18E-01        | 491                                   | 2.3      | 2.48E-17             | 2.84E-15        | 828   |
|                           | miR-29a-3p                               | na       | >0.05                | na              | na                                       | -1.4     | 1.98E-03             | 2.37E-01        | 449                                   | 2.2      | 3.12E-23             | 7.14E-21        | 726   |
|                           | miR-125b-5p                              | na       | >0.05                | na              | na                                       | -1.5     | 3.07E-03             | 2.37E-01        | 603                                   | 2.0      | 3.51E-08             | 4.12E-07        | 899   |
|                           | miR-99a-5p                               | na       | >0.05                | na              | na                                       | -1.5     | 2.17E-03             | 2.37E-01        | 126                                   | 2.4      | 1.53E-13             | 5.38E-12        | 214   |
|                           | miR-205-5p                               | na       | >0.05                | na              | na                                       | -1.6     | 4.95E-03             | 2.77E-01        | 56                                    | 1.5      | 6.15E-03             | 1.27E-02        | 70    |
|                           | miR-193b-5p                              | na       | >0.05                | na              | na                                       | -2.0     | 1.11E-02             | 4.84E-01        | 17                                    | 4.3      | 1.07E-11             | 2.73E-10        | 43    |
|                           | miR-885-5p                               | na       | >0.05                | na              | na                                       | -2.0     | 2.95E-02             | 7.23E-01        | 8                                     | 2.1      | 5.33E-03             | 1.13E-02        | 12    |
|                           | miR-885-3p                               | na       | >0.05                | na              | na                                       | -2.3     | 1.74E-02             | 5.70E-01        | 15                                    | 4.1      | 6.85E-07             | 5.51E-06        | 34    |
|                           | miR-122-5p                               | na       | >0.05                | na              | na                                       | -2.6     | 4.65E-04             | 1.82E-01        | 15405                                 | 3.1      | 6.56E-07             | 5.42E-06        | 30457 |
| 17 miR overlap            | prior PE vs. NT pregnancy (ACS cohort 1) |          |                      |                 | prior PE vs. NT preg. (non-ACS cohort 2) |          |                      |                 | ACS vs non-ACS (cohort 1 vs cohort 2) |          |                      |                 |       |
|                           | Fold Change                              | p value  | FDR-adjusted p value | miR level (CPM) | Fold Change                              | p value  | FDR-adjusted p value | miR level (CPM) | Fold Change                           | p value  | FDR-adjusted p value | miR level (CPM) |       |
|                           | miR-184                                  | 10.3     | 2.35E-04             | 3.35E-02        | 52                                       | na       | >0.05                | na              | na                                    | 11.7     | 9.00E-12             | 2.43E-10        | 24    |
|                           | miR-6730-3p                              | 7.3      | 3.46E-03             | 1.96E-01        | 4                                        | na       | >0.05                | na              | na                                    | 3.6      | 5.34E-03             | 1.13E-02        | 3     |
|                           | miR-499a-5p                              | 5.8      | 1.85E-03             | 1.58E-01        | 45                                       | na       | >0.05                | na              | na                                    | 34.2     | 8.30E-17             | 7.60E-15        | 19    |
|                           | miR-3591-5p                              | 3.8      | 4.01E-02             | 6.34E-01        | 5                                        | na       | >0.05                | na              | na                                    | 4.0      | 9.51E-04             | 2.68E-03        | 3     |
|                           | miR-4667-5p                              | 3.6      | 3.60E-02             | 5.91E-01        | 4                                        | na       | >0.05                | na              | na                                    | 3.5      | 3.53E-03             | 8.16E-03        | 3     |
|                           | miR-1                                    | 3.0      | 5.46E-03             | 2.59E-01        | 531                                      | na       | >0.05                | na              | na                                    | 3.4      | 1.55E-07             | 1.58E-06        | 296   |
|                           | miR-133a-3p                              | 2.7      | 2.78E-02             | 5.16E-01        | 76                                       | na       | >0.05                | na              | na                                    | 2.5      | 5.46E-04             | 1.71E-03        | 47    |
|                           | miR-6741-3p                              | 1.7      | 2.61E-02             | 5.07E-01        | 11                                       | na       | >0.05                | na              | na                                    | -2.0     | 3.24E-05             | 1.61E-04        | 14    |
|                           | miR-30b-5p                               | -1.8     | 1.23E-02             | 4.45E-01        | 15                                       | na       | >0.05                | na              | na                                    | -1.5     | 3.43E-03             | 8.02E-03        | 17    |
|                           | miR-1277-5p                              | -1.8     | 2.35E-02             | 5.01E-01        | 13                                       | na       | >0.05                | na              | na                                    | -2.1     | 3.92E-05             | 1.87E-04        | 18    |
|                           | miR-221-5p                               | -1.9     | 3.03E-02             | 5.39E-01        | 9                                        | na       | >0.05                | na              | na                                    | -3.4     | 9.56E-11             | 2.08E-09        | 16    |
|                           | miR-369-5p                               | -2.2     | 2.54E-02             | 5.07E-01        | 18                                       | na       | >0.05                | na              | na                                    | -2.4     | 1.20E-04             | 4.68E-04        | 28    |
|                           | miR-493-5p                               | -2.3     | 2.29E-02             | 5.01E-01        | 13                                       | na       | >0.05                | na              | na                                    | -2.8     | 1.41E-05             | 7.61E-05        | 21    |
|                           | miR-431-5p                               | -2.4     | 1.47E-02             | 4.49E-01        | 73                                       | na       | >0.05                | na              | na                                    | -2.2     | 4.74E-04             | 1.50E-03        | 112   |
|                           | miR-329-3p                               | -2.5     | 4.56E-02             | 6.54E-01        | 7                                        | na       | >0.05                | na              | na                                    | -2.1     | 3.32E-03             | 7.79E-03        | 8     |
|                           | miR-28-5p                                | -2.7     | 1.70E-02             | 4.54E-01        | 5                                        | na       | >0.05                | na              | na                                    | -2.0     | 3.76E-03             | 8.56E-03        | 5     |
|                           | miR-889-3p                               | -2.9     | 7.52E-03             | 3.21E-01        | 17                                       | na       | >0.05                | na              | na                                    | -2.9     | 1.88E-05             | 9.92E-05        | 30    |
| 5 miRs unique to cohort 2 | prior PE vs. NT pregnancy (ACS cohort 1) |          |                      |                 | prior PE vs. NT preg. (non-ACS cohort 2) |          |                      |                 | ACS vs non-ACS (cohort 1 vs cohort 2) |          |                      |                 |       |
|                           | Fold Change                              | p value  | FDR-adjusted p value | miR level (CPM) | Fold Change                              | p value  | FDR-adjusted p value | miR level (CPM) | Fold Change                           | p value  | FDR-adjusted p value | miR level (CPM) |       |
|                           | miR-1224-5p                              | na       | >0.05                | na              | na                                       | 2.1      | 3.78E-02             | 7.79E-01        | 10                                    | na       | >0.05                | na              | na    |
|                           | miR-204-5p                               | na       | >0.05                | na              | na                                       | -1.7     | 2.68E-02             | 7.02E-01        | 8                                     | na       | >0.05                | na              | na    |
|                           | miR-382-3p                               | na       | >0.05                | na              | na                                       | -1.7     | 1.49E-02             | 5.32E-01        | 15                                    | na       | >0.05                | na              | na    |
| miR-203a                  | na                                       | >0.05    | na                   | na              | -2.4                                     | 2.67E-03 | 2.37E-01             | 251             | na                                    | >0.05    | na                   | na              |       |
| miR-9-5p                  | na                                       | >0.05    | na                   | na              | -2.9                                     | 1.40E-02 | 5.32E-01             | 8               | na                                    | >0.05    | na                   | na              |       |



Table S5. Continued.

| 9 miRs unique to cohort 1   | prior PE vs. NT pregnancy (ACS cohort 1) |                      |                      |                 | prior PE vs. NT preg. (non-ACS cohort 2) |                      |                      |                 | ACS vs non-ACS (cohort 1 vs cohort 2) |                      |                      |                 |
|-----------------------------|------------------------------------------|----------------------|----------------------|-----------------|------------------------------------------|----------------------|----------------------|-----------------|---------------------------------------|----------------------|----------------------|-----------------|
|                             | Fold Change                              | p value              | FDR-adjusted p value | miR level (CPM) | Fold Change                              | p value              | FDR-adjusted p value | miR level (CPM) | Fold Change                           | p value              | FDR-adjusted p value | miR level (CPM) |
| miR-218-5p                  | 5.4                                      | 2.24E-03             | 1.60E-01             | 7               | na                                       | >0.05                | na                   | na              | na                                    | >0.05                | na                   | na              |
| miR-874-5p                  | 3.3                                      | 1.64E-02             | 4.54E-01             | 4               | na                                       | >0.05                | na                   | na              | na                                    | >0.05                | na                   | na              |
| miR-202-3p                  | 2.9                                      | 4.68E-02             | 6.54E-01             | 6               | na                                       | >0.05                | na                   | na              | na                                    | >0.05                | na                   | na              |
| miR-6767-5p                 | 2.7                                      | 1.95E-02             | 4.91E-01             | 7               | na                                       | >0.05                | na                   | na              | na                                    | >0.05                | na                   | na              |
| miR-769-5p                  | -1.5                                     | 4.20E-02             | 6.40E-01             | 27              | na                                       | >0.05                | na                   | na              | na                                    | >0.05                | na                   | na              |
| miR-2355-3p                 | -1.9                                     | 3.54E-02             | 5.91E-01             | 7               | na                                       | >0.05                | na                   | na              | na                                    | >0.05                | na                   | na              |
| miR-505-3p                  | -1.9                                     | 2.22E-02             | 5.01E-01             | 9               | na                                       | >0.05                | na                   | na              | na                                    | >0.05                | na                   | na              |
| miR-136-3p                  | -2.7                                     | 1.35E-02             | 4.45E-01             | 10              | na                                       | >0.05                | na                   | na              | na                                    | >0.05                | na                   | na              |
| miR-1292-5p                 | -3.6                                     | 8.28E-05             | 1.77E-02             | 8               | na                                       | >0.05                | na                   | na              | na                                    | >0.05                | na                   | na              |
| 230 miRs unique to cohort 3 | prior PE vs. NT pregnancy (ACS cohort 1) |                      |                      |                 | prior PE vs. NT preg. (non-ACS cohort 2) |                      |                      |                 | ACS vs non-ACS (cohort 1 vs cohort 2) |                      |                      |                 |
| Fold Change                 | p value                                  | FDR-adjusted p value | miR level (CPM)      | Fold Change     | p value                                  | FDR-adjusted p value | miR level (CPM)      | Fold Change     | p value                               | FDR-adjusted p value | miR level (CPM)      |                 |
| miR-208b-3p                 | na                                       | >0.05                | na                   | na              | na                                       | >0.05                | na                   | na              | 148.0                                 | 1.18E-23             | 5.39E-21             | 37              |
| miR-208a-3p                 | na                                       | >0.05                | na                   | na              | na                                       | >0.05                | na                   | na              | 15.2                                  | 7.87E-11             | 1.80E-09             | 3               |
| miR-125b-1-3p               | na                                       | >0.05                | na                   | na              | na                                       | >0.05                | na                   | na              | 6.3                                   | 2.98E-07             | 2.78E-06             | 4               |
| miR-122-3p                  | na                                       | >0.05                | na                   | na              | na                                       | >0.05                | na                   | na              | 4.6                                   | 9.81E-06             | 5.55E-05             | 4               |
| miR-483-5p                  | na                                       | >0.05                | na                   | na              | na                                       | >0.05                | na                   | na              | 4.4                                   | 7.31E-16             | 3.35E-14             | 305             |
| miR-34a-5p                  | na                                       | >0.05                | na                   | na              | na                                       | >0.05                | na                   | na              | 3.9                                   | 1.32E-16             | 8.64E-15             | 32              |
| miR-365a-5p                 | na                                       | >0.05                | na                   | na              | na                                       | >0.05                | na                   | na              | 3.8                                   | 9.55E-04             | 2.68E-03             | 4               |
| miR-125b-2-3p               | na                                       | >0.05                | na                   | na              | na                                       | >0.05                | na                   | na              | 3.6                                   | 6.46E-08             | 7.21E-07             | 10              |
| miR-4428                    | na                                       | >0.05                | na                   | na              | na                                       | >0.05                | na                   | na              | 3.6                                   | 1.71E-03             | 4.48E-03             | 2               |
| miR-6807-5p                 | na                                       | >0.05                | na                   | na              | na                                       | >0.05                | na                   | na              | 3.4                                   | 1.97E-03             | 4.92E-03             | 3               |
| miR-31-5p                   | na                                       | >0.05                | na                   | na              | na                                       | >0.05                | na                   | na              | 3.4                                   | 1.41E-03             | 3.78E-03             | 6               |
| miR-193a-5p                 | na                                       | >0.05                | na                   | na              | na                                       | >0.05                | na                   | na              | 3.3                                   | 1.08E-16             | 8.24E-15             | 181             |
| miR-378c                    | na                                       | >0.05                | na                   | na              | na                                       | >0.05                | na                   | na              | 2.9                                   | 8.02E-10             | 1.47E-08             | 9               |
| miR-95-3p                   | na                                       | >0.05                | na                   | na              | na                                       | >0.05                | na                   | na              | 2.9                                   | 1.03E-08             | 1.52E-07             | 11              |
| miR-195-5p                  | na                                       | >0.05                | na                   | na              | na                                       | >0.05                | na                   | na              | 2.8                                   | 4.98E-16             | 2.53E-14             | 61              |
| miR-365a-3p                 | na                                       | >0.05                | na                   | na              | na                                       | >0.05                | na                   | na              | 2.8                                   | 2.21E-06             | 1.58E-05             | 9               |
| miR-3065-5p                 | na                                       | >0.05                | na                   | na              | na                                       | >0.05                | na                   | na              | 2.7                                   | 6.32E-05             | 2.79E-04             | 6               |
| miR-3934-5p                 | na                                       | >0.05                | na                   | na              | na                                       | >0.05                | na                   | na              | 2.7                                   | 2.54E-02             | 4.55E-02             | 3               |
| miR-676-3p                  | na                                       | >0.05                | na                   | na              | na                                       | >0.05                | na                   | na              | 2.7                                   | 1.79E-03             | 4.58E-03             | 3               |
| miR-215-5p                  | na                                       | >0.05                | na                   | na              | na                                       | >0.05                | na                   | na              | 2.6                                   | 8.41E-06             | 4.94E-05             | 54              |
| miR-194-5p                  | na                                       | >0.05                | na                   | na              | na                                       | >0.05                | na                   | na              | 2.5                                   | 7.64E-12             | 2.19E-10             | 298             |
| miR-10b-5p                  | na                                       | >0.05                | na                   | na              | na                                       | >0.05                | na                   | na              | 2.5                                   | 4.51E-16             | 2.53E-14             | 897             |
| miR-211-5p                  | na                                       | >0.05                | na                   | na              | na                                       | >0.05                | na                   | na              | 2.5                                   | 2.94E-04             | 1.01E-03             | 5               |
| miR-10b-3p                  | na                                       | >0.05                | na                   | na              | na                                       | >0.05                | na                   | na              | 2.5                                   | 4.63E-05             | 2.10E-04             | 6               |
| miR-4429                    | na                                       | >0.05                | na                   | na              | na                                       | >0.05                | na                   | na              | 2.5                                   | 8.75E-05             | 3.65E-04             | 5               |
| miR-10a-3p                  | na                                       | >0.05                | na                   | na              | na                                       | >0.05                | na                   | na              | 2.4                                   | 3.63E-04             | 1.20E-03             | 6               |
| miR-378a-3p                 | na                                       | >0.05                | na                   | na              | na                                       | >0.05                | na                   | na              | 2.4                                   | 3.39E-18             | 5.18E-16             | 303             |
| miR-320c                    | na                                       | >0.05                | na                   | na              | na                                       | >0.05                | na                   | na              | 2.3                                   | 1.01E-13             | 4.20E-12             | 84              |
| miR-365b-3p                 | na                                       | >0.05                | na                   | na              | na                                       | >0.05                | na                   | na              | 2.3                                   | 2.55E-04             | 8.97E-04             | 8               |
| miR-100-5p                  | na                                       | >0.05                | na                   | na              | na                                       | >0.05                | na                   | na              | 2.3                                   | 5.54E-07             | 4.79E-06             | 132             |
| miR-320d                    | na                                       | >0.05                | na                   | na              | na                                       | >0.05                | na                   | na              | 2.3                                   | 1.39E-13             | 5.30E-12             | 45              |
| miR-196a-5p                 | na                                       | >0.05                | na                   | na              | na                                       | >0.05                | na                   | na              | 2.3                                   | 6.81E-04             | 2.04E-03             | 11              |
| miR-497-5p                  | na                                       | >0.05                | na                   | na              | na                                       | >0.05                | na                   | na              | 2.2                                   | 1.17E-03             | 3.22E-03             | 5               |
| miR-378i                    | na                                       | >0.05                | na                   | na              | na                                       | >0.05                | na                   | na              | 2.2                                   | 6.30E-06             | 3.90E-05             | 7               |
| miR-141-3p                  | na                                       | >0.05                | na                   | na              | na                                       | >0.05                | na                   | na              | 2.2                                   | 1.27E-04             | 4.95E-04             | 37              |
| miR-200b-3p                 | na                                       | >0.05                | na                   | na              | na                                       | >0.05                | na                   | na              | 2.2                                   | 5.79E-04             | 1.79E-03             | 23              |
| miR-320b                    | na                                       | >0.05                | na                   | na              | na                                       | >0.05                | na                   | na              | 2.1                                   | 4.78E-12             | 1.56E-10             | 103             |
| miR-214-3p                  | na                                       | >0.05                | na                   | na              | na                                       | >0.05                | na                   | na              | 2.1                                   | 4.34E-03             | 9.59E-03             | 5               |
| miR-483-3p                  | na                                       | >0.05                | na                   | na              | na                                       | >0.05                | na                   | na              | 2.1                                   | 1.04E-04             | 4.16E-04             | 177             |
| miR-27a-5p                  | na                                       | >0.05                | na                   | na              | na                                       | >0.05                | na                   | na              | 2.0                                   | 1.04E-02             | 2.04E-02             | 4               |
| miR-452-5p                  | na                                       | >0.05                | na                   | na              | na                                       | >0.05                | na                   | na              | 2.0                                   | 3.66E-03             | 8.38E-03             | 8               |
| miR-1246                    | na                                       | >0.05                | na                   | na              | na                                       | >0.05                | na                   | na              | 2.0                                   | 2.84E-06             | 1.88E-05             | 25              |
| miR-4714-3p                 | na                                       | >0.05                | na                   | na              | na                                       | >0.05                | na                   | na              | 1.9                                   | 2.61E-02             | 4.66E-02             | 4               |
| miR-143-5p                  | na                                       | >0.05                | na                   | na              | na                                       | >0.05                | na                   | na              | 1.9                                   | 9.84E-04             | 2.75E-03             | 11              |
| miR-874-3p                  | na                                       | >0.05                | na                   | na              | na                                       | >0.05                | na                   | na              | 1.9                                   | 5.28E-07             | 4.65E-06             | 23              |

**Table S5. Continued**

|               |    |       |    |    |    |       |    |    |      |          |          |        |
|---------------|----|-------|----|----|----|-------|----|----|------|----------|----------|--------|
| miR-200a-3p   | na | >0.05 | na | na | na | >0.05 | na | na | 1.9  | 2.77E-03 | 6.60E-03 | 25     |
| miR-424-5p    | na | >0.05 | na | na | na | >0.05 | na | na | 1.8  | 9.05E-04 | 2.57E-03 | 9      |
| miR-210-3p    | na | >0.05 | na | na | na | >0.05 | na | na | 1.8  | 1.09E-03 | 2.99E-03 | 16     |
| miR-29c-3p    | na | >0.05 | na | na | na | >0.05 | na | na | 1.8  | 2.87E-11 | 6.91E-10 | 896    |
| miR-130b-3p   | na | >0.05 | na | na | na | >0.05 | na | na | 1.8  | 1.51E-06 | 1.16E-05 | 34     |
| miR-150-3p    | na | >0.05 | na | na | na | >0.05 | na | na | 1.7  | 1.98E-03 | 4.92E-03 | 16     |
| miR-32-5p     | na | >0.05 | na | na | na | >0.05 | na | na | 1.7  | 3.35E-04 | 1.13E-03 | 402    |
| miR-192-5p    | na | >0.05 | na | na | na | >0.05 | na | na | 1.7  | 3.75E-06 | 2.38E-05 | 730    |
| miR-30a-3p    | na | >0.05 | na | na | na | >0.05 | na | na | 1.7  | 1.28E-05 | 6.98E-05 | 43     |
| miR-378a-5p   | na | >0.05 | na | na | na | >0.05 | na | na | 1.6  | 9.94E-03 | 1.98E-02 | 10     |
| miR-500a-3p   | na | >0.05 | na | na | na | >0.05 | na | na | 1.6  | 3.95E-05 | 1.87E-04 | 30     |
| miR-143-3p    | na | >0.05 | na | na | na | >0.05 | na | na | 1.6  | 1.07E-03 | 2.97E-03 | 1159   |
| miR-23b-3p    | na | >0.05 | na | na | na | >0.05 | na | na | 1.5  | 1.78E-07 | 1.76E-06 | 116    |
| miR-27b-3p    | na | >0.05 | na | na | na | >0.05 | na | na | 1.5  | 3.20E-05 | 1.61E-04 | 588    |
| miR-10a-5p    | na | >0.05 | na | na | na | >0.05 | na | na | 1.5  | 9.16E-06 | 5.31E-05 | 752    |
| miR-150-5p    | na | >0.05 | na | na | na | >0.05 | na | na | 1.5  | 1.40E-02 | 2.69E-02 | 2090   |
| miR-107       | na | >0.05 | na | na | na | >0.05 | na | na | 1.5  | 6.52E-04 | 1.97E-03 | 328    |
| miR-96-5p     | na | >0.05 | na | na | na | >0.05 | na | na | 1.5  | 1.49E-02 | 2.83E-02 | 113    |
| miR-148a-3p   | na | >0.05 | na | na | na | >0.05 | na | na | 1.5  | 5.72E-07 | 4.85E-06 | 3030   |
| miR-542-3p    | na | >0.05 | na | na | na | >0.05 | na | na | 1.5  | 1.25E-02 | 2.42E-02 | 16     |
| miR-4732-5p   | na | >0.05 | na | na | na | >0.05 | na | na | 1.4  | 4.07E-03 | 9.09E-03 | 207    |
| miR-27a-3p    | na | >0.05 | na | na | na | >0.05 | na | na | 1.4  | 7.43E-07 | 5.87E-06 | 160    |
| miR-200c-3p   | na | >0.05 | na | na | na | >0.05 | na | na | 1.4  | 2.67E-02 | 4.73E-02 | 73     |
| miR-140-3p    | na | >0.05 | na | na | na | >0.05 | na | na | 1.4  | 1.73E-03 | 4.48E-03 | 781    |
| miR-21-5p     | na | >0.05 | na | na | na | >0.05 | na | na | 1.4  | 2.26E-06 | 1.59E-05 | 18833  |
| miR-15a-5p    | na | >0.05 | na | na | na | >0.05 | na | na | 1.4  | 7.80E-03 | 1.57E-02 | 489    |
| miR-320a      | na | >0.05 | na | na | na | >0.05 | na | na | 1.4  | 7.83E-05 | 3.32E-04 | 1741   |
| miR-19b-3p    | na | >0.05 | na | na | na | >0.05 | na | na | 1.4  | 2.19E-03 | 5.39E-03 | 467    |
| miR-502-3p    | na | >0.05 | na | na | na | >0.05 | na | na | 1.4  | 6.93E-03 | 1.41E-02 | 37     |
| miR-15b-5p    | na | >0.05 | na | na | na | >0.05 | na | na | 1.4  | 6.13E-03 | 1.27E-02 | 556    |
| miR-185-5p    | na | >0.05 | na | na | na | >0.05 | na | na | 1.4  | 5.54E-03 | 1.16E-02 | 2589   |
| miR-501-3p    | na | >0.05 | na | na | na | >0.05 | na | na | 1.3  | 4.04E-03 | 9.09E-03 | 168    |
| miR-532-5p    | na | >0.05 | na | na | na | >0.05 | na | na | 1.3  | 5.03E-03 | 1.09E-02 | 245    |
| let-7c-5p     | na | >0.05 | na | na | na | >0.05 | na | na | 1.2  | 2.50E-02 | 4.51E-02 | 654    |
| miR-660-5p    | na | >0.05 | na | na | na | >0.05 | na | na | 1.2  | 1.64E-02 | 3.08E-02 | 407    |
| miR-142-5p    | na | >0.05 | na | na | na | >0.05 | na | na | 1.2  | 2.26E-02 | 4.15E-02 | 2247   |
| miR-92a-3p    | na | >0.05 | na | na | na | >0.05 | na | na | -1.3 | 1.50E-02 | 2.83E-02 | 140957 |
| miR-148b-3p   | na | >0.05 | na | na | na | >0.05 | na | na | -1.3 | 5.08E-03 | 1.09E-02 | 871    |
| let-7d-3p     | na | >0.05 | na | na | na | >0.05 | na | na | -1.3 | 9.53E-03 | 1.91E-02 | 314    |
| miR-126-5p    | na | >0.05 | na | na | na | >0.05 | na | na | -1.3 | 4.35E-03 | 9.59E-03 | 3778   |
| miR-128-3p    | na | >0.05 | na | na | na | >0.05 | na | na | -1.3 | 7.01E-04 | 2.07E-03 | 364    |
| miR-342-3p    | na | >0.05 | na | na | na | >0.05 | na | na | -1.3 | 2.39E-02 | 4.34E-02 | 3780   |
| miR-155-5p    | na | >0.05 | na | na | na | >0.05 | na | na | -1.3 | 1.45E-03 | 3.83E-03 | 414    |
| miR-339-3p    | na | >0.05 | na | na | na | >0.05 | na | na | -1.3 | 1.01E-02 | 1.99E-02 | 42     |
| miR-26a-5p    | na | >0.05 | na | na | na | >0.05 | na | na | -1.3 | 6.34E-05 | 2.79E-04 | 5364   |
| let-7f-5p     | na | >0.05 | na | na | na | >0.05 | na | na | -1.3 | 8.27E-04 | 2.38E-03 | 17925  |
| miR-92b-3p    | na | >0.05 | na | na | na | >0.05 | na | na | -1.4 | 2.66E-03 | 6.42E-03 | 564    |
| miR-941       | na | >0.05 | na | na | na | >0.05 | na | na | -1.4 | 1.16E-02 | 2.26E-02 | 159    |
| miR-425-5p    | na | >0.05 | na | na | na | >0.05 | na | na | -1.4 | 1.40E-03 | 3.77E-03 | 4999   |
| miR-181a-2-3p | na | >0.05 | na | na | na | >0.05 | na | na | -1.4 | 1.25E-02 | 2.42E-02 | 44     |
| miR-671-5p    | na | >0.05 | na | na | na | >0.05 | na | na | -1.4 | 1.91E-02 | 3.52E-02 | 64     |

**Table S5. Continued**

|              |    |       |    |    |    |       |    |    |      |          |          |       |
|--------------|----|-------|----|----|----|-------|----|----|------|----------|----------|-------|
| miR-223-5p   | na | >0.05 | na | na | na | >0.05 | na | na | -1.4 | 6.22E-03 | 1.27E-02 | 400   |
| miR-191-5p   | na | >0.05 | na | na | na | >0.05 | na | na | -1.4 | 7.54E-04 | 2.20E-03 | 3983  |
| miR-18a-5p   | na | >0.05 | na | na | na | >0.05 | na | na | -1.4 | 9.97E-03 | 1.98E-02 | 30    |
| miR-425-3p   | na | >0.05 | na | na | na | >0.05 | na | na | -1.4 | 8.07E-04 | 2.34E-03 | 87    |
| miR-340-5p   | na | >0.05 | na | na | na | >0.05 | na | na | -1.4 | 5.23E-03 | 1.12E-02 | 201   |
| miR-221-3p   | na | >0.05 | na | na | na | >0.05 | na | na | -1.4 | 1.73E-03 | 4.48E-03 | 1500  |
| let-7i-5p    | na | >0.05 | na | na | na | >0.05 | na | na | -1.4 | 2.29E-08 | 2.92E-07 | 21242 |
| let-7g-5p    | na | >0.05 | na | na | na | >0.05 | na | na | -1.4 | 3.42E-04 | 1.13E-03 | 1689  |
| miR-146a-5p  | na | >0.05 | na | na | na | >0.05 | na | na | -1.4 | 7.60E-03 | 1.54E-02 | 5306  |
| miR-18a-3p   | na | >0.05 | na | na | na | >0.05 | na | na | -1.4 | 5.54E-03 | 1.16E-02 | 45    |
| miR-6511a-3p | na | >0.05 | na | na | na | >0.05 | na | na | -1.5 | 2.54E-02 | 4.55E-02 | 9     |
| miR-374a-3p  | na | >0.05 | na | na | na | >0.05 | na | na | -1.5 | 1.64E-02 | 3.08E-02 | 13    |
| miR-185-3p   | na | >0.05 | na | na | na | >0.05 | na | na | -1.5 | 2.13E-04 | 7.63E-04 | 79    |
| miR-181a-3p  | na | >0.05 | na | na | na | >0.05 | na | na | -1.5 | 1.88E-02 | 3.47E-02 | 30    |
| miR-17-5p    | na | >0.05 | na | na | na | >0.05 | na | na | -1.5 | 2.76E-04 | 9.66E-04 | 142   |
| miR-148b-5p  | na | >0.05 | na | na | na | >0.05 | na | na | -1.5 | 7.69E-03 | 1.55E-02 | 15    |
| miR-126-3p   | na | >0.05 | na | na | na | >0.05 | na | na | -1.5 | 3.63E-05 | 1.79E-04 | 12027 |
| miR-26b-5p   | na | >0.05 | na | na | na | >0.05 | na | na | -1.5 | 7.87E-08 | 8.58E-07 | 4744  |
| miR-296-5p   | na | >0.05 | na | na | na | >0.05 | na | na | -1.5 | 4.57E-03 | 9.97E-03 | 27    |
| miR-1343-3p  | na | >0.05 | na | na | na | >0.05 | na | na | -1.5 | 1.45E-02 | 2.77E-02 | 9     |
| miR-301a-3p  | na | >0.05 | na | na | na | >0.05 | na | na | -1.6 | 2.29E-03 | 5.58E-03 | 20    |
| miR-92b-5p   | na | >0.05 | na | na | na | >0.05 | na | na | -1.6 | 8.77E-05 | 3.65E-04 | 41    |
| miR-199a-3p  | na | >0.05 | na | na | na | >0.05 | na | na | -1.6 | 1.90E-03 | 4.81E-03 | 1964  |
| miR-139-3p   | na | >0.05 | na | na | na | >0.05 | na | na | -1.6 | 2.71E-03 | 6.50E-03 | 214   |
| miR-6805-5p  | na | >0.05 | na | na | na | >0.05 | na | na | -1.6 | 1.88E-02 | 3.47E-02 | 7     |
| miR-324-5p   | na | >0.05 | na | na | na | >0.05 | na | na | -1.6 | 3.40E-04 | 1.13E-03 | 108   |
| miR-199b-3p  | na | >0.05 | na | na | na | >0.05 | na | na | -1.6 | 1.34E-03 | 3.63E-03 | 1572  |
| miR-628-3p   | na | >0.05 | na | na | na | >0.05 | na | na | -1.6 | 1.95E-04 | 7.03E-04 | 76    |
| miR-98-5p    | na | >0.05 | na | na | na | >0.05 | na | na | -1.6 | 2.16E-08 | 2.82E-07 | 174   |
| miR-28-3p    | na | >0.05 | na | na | na | >0.05 | na | na | -1.6 | 4.20E-04 | 1.36E-03 | 454   |
| miR-151a-5p  | na | >0.05 | na | na | na | >0.05 | na | na | -1.6 | 4.47E-04 | 1.43E-03 | 24    |
| miR-374b-5p  | na | >0.05 | na | na | na | >0.05 | na | na | -1.6 | 6.74E-05 | 2.91E-04 | 28    |
| miR-3200-5p  | na | >0.05 | na | na | na | >0.05 | na | na | -1.6 | 2.44E-02 | 4.41E-02 | 6     |
| miR-4742-3p  | na | >0.05 | na | na | na | >0.05 | na | na | -1.6 | 6.98E-04 | 2.07E-03 | 14    |
| miR-191-3p   | na | >0.05 | na | na | na | >0.05 | na | na | -1.7 | 4.47E-03 | 9.80E-03 | 16    |
| miR-652-3p   | na | >0.05 | na | na | na | >0.05 | na | na | -1.7 | 6.26E-06 | 3.90E-05 | 45    |
| miR-30d-5p   | na | >0.05 | na | na | na | >0.05 | na | na | -1.7 | 1.93E-07 | 1.84E-06 | 16794 |
| miR-151a-3p  | na | >0.05 | na | na | na | >0.05 | na | na | -1.7 | 2.18E-05 | 1.14E-04 | 2627  |
| miR-590-3p   | na | >0.05 | na | na | na | >0.05 | na | na | -1.7 | 1.09E-04 | 4.32E-04 | 17    |
| miR-190a-5p  | na | >0.05 | na | na | na | >0.05 | na | na | -1.7 | 1.66E-03 | 4.36E-03 | 128   |
| miR-103a-3p  | na | >0.05 | na | na | na | >0.05 | na | na | -1.7 | 1.95E-08 | 2.63E-07 | 5337  |
| miR-182-5p   | na | >0.05 | na | na | na | >0.05 | na | na | -1.7 | 1.02E-04 | 4.12E-04 | 1298  |
| miR-342-5p   | na | >0.05 | na | na | na | >0.05 | na | na | -1.7 | 6.13E-03 | 1.27E-02 | 5     |
| miR-223-3p   | na | >0.05 | na | na | na | >0.05 | na | na | -1.8 | 1.37E-04 | 5.25E-04 | 8005  |
| miR-1538     | na | >0.05 | na | na | na | >0.05 | na | na | -1.8 | 1.67E-02 | 3.13E-02 | 6     |
| miR-1226-3p  | na | >0.05 | na | na | na | >0.05 | na | na | -1.8 | 7.12E-04 | 2.09E-03 | 12    |
| miR-3940-3p  | na | >0.05 | na | na | na | >0.05 | na | na | -1.8 | 3.14E-03 | 7.41E-03 | 8     |
| miR-374a-5p  | na | >0.05 | na | na | na | >0.05 | na | na | -1.8 | 1.81E-07 | 1.76E-06 | 118   |
| miR-181c-5p  | na | >0.05 | na | na | na | >0.05 | na | na | -1.8 | 6.18E-04 | 1.89E-03 | 11    |
| miR-6881-3p  | na | >0.05 | na | na | na | >0.05 | na | na | -1.8 | 5.31E-03 | 1.13E-02 | 6     |
| miR-369-3p   | na | >0.05 | na | na | na | >0.05 | na | na | -1.8 | 6.20E-03 | 1.27E-02 | 25    |

**Table S5. Continued**

|              |    |       |    |    |    |       |    |    |      |          |          |      |
|--------------|----|-------|----|----|----|-------|----|----|------|----------|----------|------|
| miR-134-5p   | na | >0.05 | na | na | na | >0.05 | na | na | -1.8 | 4.06E-03 | 9.09E-03 | 206  |
| miR-1260a    | na | >0.05 | na | na | na | >0.05 | na | na | -1.8 | 3.46E-03 | 8.05E-03 | 10   |
| miR-4665-5p  | na | >0.05 | na | na | na | >0.05 | na | na | -1.8 | 1.40E-02 | 2.69E-02 | 5    |
| miR-454-3p   | na | >0.05 | na | na | na | >0.05 | na | na | -1.8 | 2.69E-05 | 1.37E-04 | 126  |
| miR-4685-3p  | na | >0.05 | na | na | na | >0.05 | na | na | -1.8 | 2.37E-04 | 8.42E-04 | 9    |
| miR-6515-3p  | na | >0.05 | na | na | na | >0.05 | na | na | -1.9 | 3.60E-03 | 8.29E-03 | 5    |
| miR-130b-5p  | na | >0.05 | na | na | na | >0.05 | na | na | -1.9 | 4.49E-04 | 1.43E-03 | 14   |
| miR-1908-5p  | na | >0.05 | na | na | na | >0.05 | na | na | -1.9 | 2.87E-06 | 1.88E-05 | 67   |
| miR-127-5p   | na | >0.05 | na | na | na | >0.05 | na | na | -1.9 | 2.68E-02 | 4.74E-02 | 5    |
| miR-30e-3p   | na | >0.05 | na | na | na | >0.05 | na | na | -1.9 | 1.67E-08 | 2.32E-07 | 158  |
| miR-1306-5p  | na | >0.05 | na | na | na | >0.05 | na | na | -1.9 | 7.19E-12 | 2.19E-10 | 369  |
| miR-181d-5p  | na | >0.05 | na | na | na | >0.05 | na | na | -1.9 | 3.05E-04 | 1.03E-03 | 19   |
| miR-628-5p   | na | >0.05 | na | na | na | >0.05 | na | na | -1.9 | 1.95E-03 | 4.90E-03 | 17   |
| miR-1307-3p  | na | >0.05 | na | na | na | >0.05 | na | na | -1.9 | 3.30E-07 | 3.03E-06 | 1047 |
| miR-491-5p   | na | >0.05 | na | na | na | >0.05 | na | na | -2.0 | 6.21E-04 | 1.89E-03 | 15   |
| miR-6803-3p  | na | >0.05 | na | na | na | >0.05 | na | na | -2.0 | 8.60E-08 | 9.16E-07 | 21   |
| miR-5189-5p  | na | >0.05 | na | na | na | >0.05 | na | na | -2.0 | 1.06E-02 | 2.07E-02 | 4    |
| miR-323b-3p  | na | >0.05 | na | na | na | >0.05 | na | na | -2.0 | 2.42E-03 | 5.86E-03 | 44   |
| miR-625-3p   | na | >0.05 | na | na | na | >0.05 | na | na | -2.0 | 4.48E-05 | 2.05E-04 | 471  |
| miR-5187-5p  | na | >0.05 | na | na | na | >0.05 | na | na | -2.0 | 3.83E-04 | 1.25E-03 | 9    |
| miR-99b-5p   | na | >0.05 | na | na | na | >0.05 | na | na | -2.0 | 6.63E-07 | 5.42E-06 | 437  |
| miR-1304-3p  | na | >0.05 | na | na | na | >0.05 | na | na | -2.0 | 6.68E-05 | 2.91E-04 | 19   |
| miR-26a-1-3p | na | >0.05 | na | na | na | >0.05 | na | na | -2.1 | 1.45E-03 | 3.83E-03 | 7    |
| miR-370-3p   | na | >0.05 | na | na | na | >0.05 | na | na | -2.1 | 1.83E-03 | 4.66E-03 | 47   |
| miR-664a-3p  | na | >0.05 | na | na | na | >0.05 | na | na | -2.1 | 1.02E-04 | 4.12E-04 | 12   |
| miR-744-5p   | na | >0.05 | na | na | na | >0.05 | na | na | -2.1 | 1.43E-07 | 1.49E-06 | 384  |
| miR-1179     | na | >0.05 | na | na | na | >0.05 | na | na | -2.1 | 1.54E-04 | 5.78E-04 | 6    |
| miR-331-3p   | na | >0.05 | na | na | na | >0.05 | na | na | -2.1 | 4.28E-05 | 1.98E-04 | 12   |
| miR-382-5p   | na | >0.05 | na | na | na | >0.05 | na | na | -2.1 | 2.81E-04 | 9.74E-04 | 402  |
| miR-197-3p   | na | >0.05 | na | na | na | >0.05 | na | na | -2.1 | 2.60E-08 | 3.21E-07 | 375  |
| miR-493-3p   | na | >0.05 | na | na | na | >0.05 | na | na | -2.1 | 2.27E-03 | 5.56E-03 | 12   |
| miR-199a-5p  | na | >0.05 | na | na | na | >0.05 | na | na | -2.1 | 2.98E-04 | 1.02E-03 | 25   |
| miR-423-3p   | na | >0.05 | na | na | na | >0.05 | na | na | -2.1 | 1.84E-09 | 3.24E-08 | 858  |
| miR-3138     | na | >0.05 | na | na | na | >0.05 | na | na | -2.1 | 1.70E-04 | 6.30E-04 | 10   |
| miR-6852-5p  | na | >0.05 | na | na | na | >0.05 | na | na | -2.2 | 1.46E-04 | 5.53E-04 | 33   |
| miR-1249     | na | >0.05 | na | na | na | >0.05 | na | na | -2.2 | 5.69E-05 | 2.56E-04 | 17   |
| miR-409-5p   | na | >0.05 | na | na | na | >0.05 | na | na | -2.2 | 3.95E-03 | 8.95E-03 | 6    |
| miR-584-5p   | na | >0.05 | na | na | na | >0.05 | na | na | -2.2 | 2.23E-09 | 3.64E-08 | 1129 |
| miR-548j-5p  | na | >0.05 | na | na | na | >0.05 | na | na | -2.2 | 8.20E-06 | 4.94E-05 | 46   |
| miR-323a-3p  | na | >0.05 | na | na | na | >0.05 | na | na | -2.2 | 1.36E-04 | 5.24E-04 | 31   |
| miR-1260b    | na | >0.05 | na | na | na | >0.05 | na | na | -2.2 | 1.85E-04 | 6.78E-04 | 13   |
| miR-6747-3p  | na | >0.05 | na | na | na | >0.05 | na | na | -2.2 | 8.31E-06 | 4.94E-05 | 8    |
| miR-181c-3p  | na | >0.05 | na | na | na | >0.05 | na | na | -2.2 | 6.24E-04 | 1.89E-03 | 9    |
| miR-330-3p   | na | >0.05 | na | na | na | >0.05 | na | na | -2.2 | 2.97E-03 | 7.05E-03 | 8    |
| miR-328-3p   | na | >0.05 | na | na | na | >0.05 | na | na | -2.3 | 4.61E-09 | 7.28E-08 | 1034 |
| miR-6842-3p  | na | >0.05 | na | na | na | >0.05 | na | na | -2.3 | 3.32E-06 | 2.14E-05 | 9    |
| miR-381-3p   | na | >0.05 | na | na | na | >0.05 | na | na | -2.3 | 1.90E-04 | 6.91E-04 | 54   |
| miR-671-3p   | na | >0.05 | na | na | na | >0.05 | na | na | -2.3 | 3.97E-05 | 1.87E-04 | 24   |
| miR-379-5p   | na | >0.05 | na | na | na | >0.05 | na | na | -2.4 | 3.82E-05 | 1.86E-04 | 85   |
| miR-339-5p   | na | >0.05 | na | na | na | >0.05 | na | na | -2.4 | 5.74E-08 | 6.58E-07 | 191  |
| miR-487b-5p  | na | >0.05 | na | na | na | >0.05 | na | na | -2.4 | 1.24E-03 | 3.39E-03 | 5    |

**Table S5. Continued**

|              |    |       |    |    |    |       |    |    |      |          |          |      |
|--------------|----|-------|----|----|----|-------|----|----|------|----------|----------|------|
| miR-1296-5p  | na | >0.05 | na | na | na | >0.05 | na | na | -2.4 | 9.09E-05 | 3.75E-04 | 8    |
| miR-411-5p   | na | >0.05 | na | na | na | >0.05 | na | na | -2.4 | 1.59E-04 | 5.93E-04 | 20   |
| miR-654-3p   | na | >0.05 | na | na | na | >0.05 | na | na | -2.4 | 7.06E-05 | 3.02E-04 | 68   |
| miR-432-5p   | na | >0.05 | na | na | na | >0.05 | na | na | -2.5 | 2.60E-05 | 1.34E-04 | 736  |
| miR-433-3p   | na | >0.05 | na | na | na | >0.05 | na | na | -2.5 | 4.28E-03 | 9.51E-03 | 4    |
| miR-4750-5p  | na | >0.05 | na | na | na | >0.05 | na | na | -2.5 | 1.75E-03 | 4.50E-03 | 4    |
| miR-7110-3p  | na | >0.05 | na | na | na | >0.05 | na | na | -2.6 | 2.13E-03 | 5.27E-03 | 4    |
| miR-1229-3p  | na | >0.05 | na | na | na | >0.05 | na | na | -2.6 | 1.43E-06 | 1.11E-05 | 10   |
| miR-326      | na | >0.05 | na | na | na | >0.05 | na | na | -2.6 | 9.37E-06 | 5.36E-05 | 39   |
| miR-4533     | na | >0.05 | na | na | na | >0.05 | na | na | -2.6 | 4.74E-03 | 1.03E-02 | 4    |
| miR-335-3p   | na | >0.05 | na | na | na | >0.05 | na | na | -2.6 | 4.06E-07 | 3.65E-06 | 24   |
| miR-766-3p   | na | >0.05 | na | na | na | >0.05 | na | na | -2.6 | 4.47E-04 | 1.43E-03 | 10   |
| miR-1273h-3p | na | >0.05 | na | na | na | >0.05 | na | na | -2.7 | 1.64E-06 | 1.23E-05 | 15   |
| miR-4433-5p  | na | >0.05 | na | na | na | >0.05 | na | na | -2.8 | 1.20E-05 | 6.69E-05 | 6    |
| miR-485-5p   | na | >0.05 | na | na | na | >0.05 | na | na | -2.8 | 2.56E-06 | 1.75E-05 | 73   |
| miR-1301-3p  | na | >0.05 | na | na | na | >0.05 | na | na | -2.8 | 2.86E-08 | 3.45E-07 | 46   |
| miR-556-3p   | na | >0.05 | na | na | na | >0.05 | na | na | -2.8 | 8.84E-04 | 2.53E-03 | 4    |
| miR-6721-5p  | na | >0.05 | na | na | na | >0.05 | na | na | -2.8 | 1.69E-05 | 8.99E-05 | 11   |
| miR-409-3p   | na | >0.05 | na | na | na | >0.05 | na | na | -2.8 | 2.21E-06 | 1.58E-05 | 654  |
| miR-4446-3p  | na | >0.05 | na | na | na | >0.05 | na | na | -2.8 | 6.57E-06 | 4.01E-05 | 21   |
| miR-4646-3p  | na | >0.05 | na | na | na | >0.05 | na | na | -3.0 | 5.76E-09 | 8.79E-08 | 6    |
| miR-543      | na | >0.05 | na | na | na | >0.05 | na | na | -3.1 | 2.65E-06 | 1.79E-05 | 6    |
| miR-485-3p   | na | >0.05 | na | na | na | >0.05 | na | na | -3.1 | 1.72E-06 | 1.27E-05 | 136  |
| miR-5193     | na | >0.05 | na | na | na | >0.05 | na | na | -3.3 | 1.21E-05 | 6.70E-05 | 5    |
| miR-5010-3p  | na | >0.05 | na | na | na | >0.05 | na | na | -3.3 | 2.07E-09 | 3.52E-08 | 8    |
| miR-4433b-3p | na | >0.05 | na | na | na | >0.05 | na | na | -3.7 | 1.02E-04 | 4.12E-04 | 34   |
| miR-4433b-5p | na | >0.05 | na | na | na | >0.05 | na | na | -4.0 | 7.04E-10 | 1.38E-08 | 2369 |
| miR-6772-3p  | na | >0.05 | na | na | na | >0.05 | na | na | -4.1 | 7.21E-10 | 1.38E-08 | 7    |
| miR-127-3p   | na | >0.05 | na | na | na | >0.05 | na | na | -4.1 | 1.45E-08 | 2.07E-07 | 19   |
| miR-5698     | na | >0.05 | na | na | na | >0.05 | na | na | -4.2 | 4.21E-05 | 1.97E-04 | 5    |
| miR-3620-3p  | na | >0.05 | na | na | na | >0.05 | na | na | -4.4 | 2.45E-06 | 1.70E-05 | 4    |
| miR-4513     | na | >0.05 | na | na | na | >0.05 | na | na | -5.6 | 1.85E-02 | 3.44E-02 | 4    |

**Table S6.** 104 circulating miRNAs previously identified via high-throughput screening to be differentially altered in plasma, serum or whole blood of women with preeclampsia versus normotensive pregnancy. Data is adapted from a systematic review by Sheikh et al. [4].

| MicroRNA ID         |                      | Number of Citations | References                                                       |
|---------------------|----------------------|---------------------|------------------------------------------------------------------|
| Source Nomenclature | Updated Nomenclature |                     |                                                                  |
| 519d                | miR-519d-3p          | 3                   | Li et al., 2013[9], Yang et al., 2011[10], Yang et al., 2015[11] |
| 517c                | miR-517c-3p          | 3                   | Li et al., 2013, Yang et al., 2011, Yang et al., 2015            |
| 29a                 | miR-29a-3p           | 3                   | Li et al., 2013, Yang et al., 2011, Yang et al., 2015            |
| 144                 | miR-144-3p           | 3                   | Li et al., 2013, Ura et al., 2014[12], Wu et al., 2012[13]       |
| 130a                | miR-130a-3p          | 3                   | Li et al., 2013, Wu et al., 2012, Yang et al., 2015              |
| 18a                 | miR-18a-5p           | 2                   | Li et al., 2013, Yang et al., 2015                               |
| 125b                | miR-125b-5p          | 2                   | Li et al., 2013, Yang et al., 2011                               |
| 27a                 | miR-27a-3p           | 2                   | Li et al., 2013, Yang et al., 2015                               |
| 24                  | miR-24-3p            | 2                   | Li et al., 2013, Wu et al., 2012                                 |
| 518b                | miR-518b             | 2                   | Li et al., 2013, Ura et al., 2014                                |
| 25                  | miR-25-3p            | 2                   | Li et al., 2013, Ura et al., 2014                                |
| 223                 | miR-223-3p           | 2                   | Li et al., 2013, Yang et al., 2011                               |
| 185                 | miR-185-5p           | 2                   | Li et al., 2013, Yang et al., 2011                               |
| 126                 | miR-126-3p           | 2                   | Ura et al., 2014, Yang et al., 2015                              |
| 518e                | miR-518e-3p          | 2                   | Yang et al., 2011, Yang et al., 2015                             |
| 19a                 | miR-19a-3p           | 1                   | Li et al., 2013                                                  |
| 101                 | miR-101-3p           | 1                   | Li et al., 2013                                                  |
| 26b                 | miR-26b-5p           | 1                   | Li et al., 2013                                                  |
| 378                 | miR-378a-3p          | 1                   | Li et al., 2013                                                  |
| 144*                | miR-144-5p           | 1                   | Li et al., 2013                                                  |
| 182                 | miR-182-5p           | 1                   | Li et al., 2013                                                  |
| 29c                 | miR-29c-3p           | 1                   | Li et al., 2013                                                  |
| 518c                | miR-518c-3p          | 1                   | Li et al., 2013                                                  |
| 515-3p              | miR-515-3p           | 1                   | Li et al., 2013                                                  |
| 424                 | miR-424-5p           | 1                   | Li et al., 2013                                                  |
| 29b                 | miR-29b-3p           | 1                   | Li et al., 2013                                                  |
| 21                  | miR-21-5p            | 1                   | Li et al., 2013                                                  |
| 19b                 | miR-19b-3p           | 1                   | Li et al., 2013                                                  |
| 451                 | miR-451a             | 1                   | Li et al., 2013                                                  |
| 210                 | miR-210-3p           | 1                   | Ura et al., 2014                                                 |
| 32                  | miR-32-5p            | 1                   | Ura et al., 2014                                                 |
| 204                 | miR-204-5p           | 1                   | Ura et al., 2014                                                 |
| 296-5p              | miR-296-5p           | 1                   | Ura et al., 2014                                                 |
|                     |                      |                     |                                                                  |

|         |             |   |                                    |
|---------|-------------|---|------------------------------------|
| 152     | miR-152-3p  | 1 | Ura et al., 2014                   |
| 335     | miR-335-5p  | 1 | Ura et al., 2014                   |
| 26a     | miR-26a-5p  | 1 | Wu et al., 2012                    |
| 151-3p  | miR-151-3p  | 1 | Wu et al., 2012                    |
| 181a    | miR-181a-5p | 1 | Wu et al., 2012                    |
| 30d     | miR-30d-5p  | 1 | Wu et al., 2012                    |
| 342-3p  | miR-342-3p  | 1 | Wu et al., 2012                    |
| 16      | miR-16-5p   | 1 | Wu et al., 2012                    |
| 520g    | miR-520g-3p | 1 | Yang et al., 2011                  |
| 542-3p  | miR-542-3p  | 1 | Yang et al., 2011                  |
| 135b    | miR-135b-5p | 1 | Yang et al., 2015                  |
| 149     | miR-149-5p  | 1 | Yang et al., 2015                  |
| 188-5p  | miR-188-5p  | 1 | Yang et al., 2015                  |
| 18b     | miR-18b-5p  | 1 | Yang et al., 2015                  |
| 203     | miR-203-3p  | 1 | Yang et al., 2015                  |
| 205     | miR-205-5p  | 1 | Yang et al., 2015                  |
| 224     | miR-224-5p  | 1 | Yang et al., 2015                  |
| 301a    | miR-301a-3p | 1 | Yang et al., 2015                  |
| 518a-3p | miR-518a-3p | 1 | Yang et al., 2015                  |
| 126*    | miR-126-5p  | 1 | Yang et al., 2015                  |
| 142-3p  | miR-142-3p  | 1 | Yang et al., 2015                  |
| 93      | miR-93-5p   | 1 | Yang et al., 2015                  |
| 34a     | miR-34a-5p  | 1 | Li et al., 2013                    |
| 517b    | miR-517b-3p | 2 | Li et al., 2013, Yang et al., 2011 |
| 221     | miR-221-3p  | 2 | Li et al., 2013, Wu et al., 2012   |
| 521     | miR-521     | 2 | Li et al., 2013, Yang et al., 2011 |
| 519a    | miR-519a-3p | 2 | Li et al., 2013, Yang et al., 2011 |
| 520h    | miR-520h    | 2 | Li et al., 2013, Yang et al., 2011 |
| 125a-5p | miR-125a-5p | 2 | Li et al., 2013, Yang et al., 2011 |
| 145     | miR-145-5p  | 2 | Li et al., 2013, Wu et al., 2012   |
| 15b     | miR-15b-5p  | 2 | Li et al., 2013, Ura et al., 2014  |
| 320c    | miR-320c    | 2 | Li et al., 2013, Yang et al., 2011 |
| let-7f  | let-7f-5p   | 2 | Li et al., 2013, Yang et al., 2011 |
| 23a*    | miR-23a-5p  | 1 | Akehrst et al., 2015 [14]          |
| 196b-5p | miR-196b-5p | 1 | Akehrst et al., 2015               |
| 206-5p  | miR-206-5p  | 1 | Akehrst et al., 2015               |
| 502-5p  | miR-502-5p  | 1 | Akehrst et al., 2015               |
| 503-5p  | miR-503-5p  | 1 | Akehrst et al., 2015               |
| 758-3p  | miR-758-3p  | 1 | Akehrst et al., 2015               |
| 10a     | miR-10a-5p  | 1 | Li et al., 2013                    |
| 114     | miR-114     | 1 | Li et al., 2013                    |

|               |             |   |                   |
|---------------|-------------|---|-------------------|
| 15b*          | miR-15b-3p  | 1 | Li et al., 2013   |
| 30a           | miR-30a-5p  | 1 | Li et al., 2013   |
| 519e          | miR-519e-3p | 1 | Li et al., 2013   |
| 299a-5p       | miR-299a-5p | 1 | Li et al., 2013   |
| 23a           | miR-23a-3p  | 1 | Li et al., 2013   |
| 23b           | miR-23b-3p  | 1 | Li et al., 2013   |
| 525-3p        | miR-525-3p  | 1 | Li et al., 2013   |
| 199a-5p       | miR-199a-5p | 1 | Li et al., 2013   |
| 100           | miR-100-5p  | 1 | Li et al., 2013   |
| 99a           | miR-99a-5p  | 1 | Li et al., 2013   |
| 512-5p        | miR-512-5p  | 1 | Li et al., 2013   |
| 30b           | miR-30b-5p  | 1 | Li et al., 2013   |
| 107           | miR-107     | 1 | Li et al., 2013   |
| 1233          | miR-1233-3p | 1 | Ura et al., 2014  |
| 650           | miR-650     | 1 | Ura et al., 2014  |
| 520a          | miR-520a-3p | 1 | Ura et al., 2014  |
| 215           | miR-215-5p  | 1 | Ura et al., 2014  |
| 193a-3p       | miR-193a-3p | 1 | Ura et al., 2014  |
| 668           | miR-668-3p  | 1 | Ura et al., 2014  |
| 376a          | miR-376a-3p | 1 | Ura et al., 2014  |
| 574-5p        | miR-574-5p  | 1 | Wu et al., 2012   |
| 130b          | miR-130b-3p | 1 | Wu et al., 2012   |
| 103           | miR-103a-3p | 1 | Wu et al., 2012   |
| 425           | miR-425-5p  | 1 | Wu et al., 2012   |
| 136           | miR-136-5p  | 1 | Yang et al., 2011 |
| let-7f-1-star | let-7f-1-3p | 1 | Yang et al., 2011 |
| let-7a-star   | let-7a-3p   | 1 | Yang et al., 2011 |
| 1260          | miR-1260a   | 1 | Yang et al., 2011 |
| let-7d        | let-7d-5p   | 1 | Yang et al., 2011 |
| 1272          | miR-1272    | 1 | Yang et al., 2011 |



**Table S7.** Overlap in differentially altered miRs (p<0.05) identified in cohorts 1, 2 and 4 in relation to a history of PE or NT pregnancy (cohort 1 and 2) or current PE versus NT. Only the direction of change in miRNA level is shown for previously published data. Up/Down denotes conflicting information on direction.

| 2 common miRs                   | prior PE vs. NT pregnancy (ACS cohort 1) |          |                      |                 | prior PE vs. NT preg. (non-ACS cohort 2) |          |                      |                 | current PE vs NT pregnancy (cohort 4; published literature) |                 |                |                 |                 |                       |
|---------------------------------|------------------------------------------|----------|----------------------|-----------------|------------------------------------------|----------|----------------------|-----------------|-------------------------------------------------------------|-----------------|----------------|-----------------|-----------------|-----------------------|
|                                 | Fold Change                              | p value  | FDR-adjusted p value | miR level (CPM) | Fold Change                              | p value  | FDR-adjusted p value | miR level (CPM) | Li et al 2013                                               | Yang et al 2011 | Wu et al. 2012 | Yang et al 2015 | Ura et al. 2014 | Akehurst et al., 2015 |
| miR-206                         | -10.6                                    | 1.64E-06 | 6.98E-04             | 242             | -1.8                                     | 2.06E-02 | 6.21E-01             | 25              |                                                             |                 |                |                 |                 | Up                    |
| miR-376a-3p                     | -4.7                                     | 1.10E-03 | 1.17E-01             | 7               | -1.6                                     | 3.50E-02 | 7.63E-01             | 23              |                                                             |                 |                |                 | Down            |                       |
| 6 miRs common to cohort 2 and 4 | prior PE vs. NT pregnancy (ACS cohort 1) |          |                      |                 | prior PE vs. NT preg. (non-ACS cohort 2) |          |                      |                 | current PE vs NT pregnancy (cohort 4; published literature) |                 |                |                 |                 |                       |
|                                 | Fold Change                              | p value  | FDR-adjusted p value | miR level (CPM) | Fold Change                              | p value  | FDR-adjusted p value | miR level (CPM) | Li et al 2013                                               | Yang et al 2011 | Wu et al. 2012 | Yang et al 2015 | Ura et al. 2014 | Akehurst et al., 2015 |
| miR-30a-5p                      | na                                       | >0.05    | na                   | na              | -1.2                                     | 4.93E-02 | 9.18E-01             | 491             | Up                                                          |                 |                |                 |                 |                       |
| miR-29a-3p                      | na                                       | >0.05    | na                   | na              | -1.4                                     | 1.98E-03 | 2.37E-01             | 449             | Up                                                          | Up              |                | Up              |                 |                       |
| miR-125b-5p                     | na                                       | >0.05    | na                   | na              | -1.5                                     | 3.07E-03 | 2.37E-01             | 603             | Up                                                          | Up              |                |                 |                 |                       |
| miR-99a-5p                      | na                                       | >0.05    | na                   | na              | -1.5                                     | 2.17E-03 | 2.37E-01             | 126             | Up                                                          |                 |                |                 |                 |                       |
| miR-205-5p                      | na                                       | >0.05    | na                   | na              | -1.6                                     | 4.95E-03 | 2.77E-01             | 56              |                                                             |                 |                | Up              |                 |                       |
| miR-204-5p                      | na                                       | >0.05    | na                   | na              | -1.7                                     | 2.68E-02 | 7.02E-01             | 8               |                                                             |                 |                |                 | Up              |                       |
| 1 miR common to cohort 1 and 4  | prior PE vs. NT pregnancy (ACS cohort 1) |          |                      |                 | prior PE vs. NT preg. (non-ACS cohort 2) |          |                      |                 | current PE vs NT pregnancy (cohort 4; published literature) |                 |                |                 |                 |                       |
|                                 | Fold Change                              | p value  | FDR-adjusted p value | miR level (CPM) | Fold Change                              | p value  | FDR-adjusted p value | miR level (CPM) | Li et al 2013                                               | Yang et al 2011 | Wu et al. 2012 | Yang et al 2015 | Ura et al. 2014 | Akehurst et al., 2015 |
| miR-30b-5p                      | -1.8                                     | 1.23E-02 | 4.45E-01             | 14.88265        | na                                       | >0.05    | na                   | na              | Up                                                          |                 |                |                 |                 |                       |
| 2 common miRs                   | prior PE vs. NT pregnancy (ACS cohort 1) |          |                      |                 | prior PE vs. NT preg. (non-ACS cohort 2) |          |                      |                 | current PE vs NT pregnancy (cohort 4; published literature) |                 |                |                 |                 |                       |
|                                 | Fold Change                              | p value  | FDR-adjusted p value | miR level (CPM) | Fold Change                              | p value  | FDR-adjusted p value | miR level (CPM) | Li et al 2013                                               | Yang et al 2011 | Wu et al. 2012 | Yang et al 2015 | Ura et al. 2014 | Akehurst et al., 2015 |
| miR-1299                        | 4.9                                      | 3.67E-03 | 1.96E-01             | 23              | 4.0                                      | 3.63E-03 | 2.37E-01             | 10              | na                                                          | na              | na             | na              | na              | na                    |
| miR-4662a-5p                    | 3.5                                      | 1.33E-02 | 4.45E-01             | 5               | -2.0                                     | 9.21E-03 | 4.51E-01             | 4               | na                                                          | na              | na             | na              | na              | na                    |
| 10 miRs unique to cohort 2      | prior PE vs. NT pregnancy (ACS cohort 1) |          |                      |                 | prior PE vs. NT preg. (non-ACS cohort 2) |          |                      |                 | current PE vs NT pregnancy (cohort 4; published literature) |                 |                |                 |                 |                       |
|                                 | Fold Change                              | p value  | FDR-adjusted p value | miR level (CPM) | Fold Change                              | p value  | FDR-adjusted p value | miR level (CPM) | Li et al 2013                                               | Yang et al 2011 | Wu et al. 2012 | Yang et al 2015 | Ura et al. 2014 | Akehurst et al., 2015 |
| miR-1224-5p                     | na                                       | >0.05    | na                   | na              | 2.1                                      | 3.78E-02 | 7.79E-01             | 10              | na                                                          | na              | na             | na              | na              | na                    |
| miR-877-3p                      | na                                       | >0.05    | na                   | na              | 1.6                                      | 2.32E-02 | 6.50E-01             | 8               | na                                                          | na              | na             | na              | na              | na                    |
| miR-22-3p                       | na                                       | >0.05    | na                   | na              | 1.3                                      | 3.47E-02 | 7.63E-01             | 506             | na                                                          | na              | na             | na              | na              | na                    |
| miR-382-3p                      | na                                       | >0.05    | na                   | na              | -1.7                                     | 1.49E-02 | 5.32E-01             | 15              | na                                                          | na              | na             | na              | na              | na                    |
| miR-193b-5p                     | na                                       | >0.05    | na                   | na              | -2.0                                     | 1.11E-02 | 4.84E-01             | 17              | na                                                          | na              | na             | na              | na              | na                    |
| miR-885-5p                      | na                                       | >0.05    | na                   | na              | -2.0                                     | 2.95E-02 | 7.23E-01             | 8               | na                                                          | na              | na             | na              | na              | na                    |
| miR-885-3p                      | na                                       | >0.05    | na                   | na              | -2.3                                     | 1.74E-02 | 5.70E-01             | 15              | na                                                          | na              | na             | na              | na              | na                    |
| miR-203a                        | na                                       | >0.05    | na                   | na              | -2.4                                     | 2.67E-03 | 2.37E-01             | 251             | na                                                          | na              | na             | na              | na              | na                    |
| miR-122-5p                      | na                                       | >0.05    | na                   | na              | -2.6                                     | 4.65E-04 | 1.82E-01             | 15405           | na                                                          | na              | na             | na              | na              | na                    |
| miR-9-5p                        | na                                       | >0.05    | na                   | na              | -2.9                                     | 1.40E-02 | 5.32E-01             | 8               | na                                                          | na              | na             | na              | na              | na                    |
| 25 miRs unique to cohort 1      | prior PE vs. NT pregnancy (ACS cohort 1) |          |                      |                 | prior PE vs. NT preg. (non-ACS cohort 2) |          |                      |                 | current PE vs NT pregnancy (cohort 4; published literature) |                 |                |                 |                 |                       |
|                                 | Fold Change                              | p value  | FDR-adjusted p value | miR level (CPM) | Fold Change                              | p value  | FDR-adjusted p value | miR level (CPM) | Li et al 2013                                               | Yang et al 2011 | Wu et al. 2012 | Yang et al 2015 | Ura et al. 2014 | Akehurst et al., 2015 |
| miR-184                         | 10.3                                     | 2.35E-04 | 3.35E-02             | 52              | na                                       | >0.05    | na                   | na              | na                                                          | na              | na             | na              | na              | na                    |
| miR-6730-3p                     | 7.3                                      | 3.46E-03 | 1.96E-01             | 4               | na                                       | >0.05    | na                   | na              | na                                                          | na              | na             | na              | na              | na                    |
| miR-499a-5p                     | 5.8                                      | 1.85E-03 | 1.58E-01             | 45              | na                                       | >0.05    | na                   | na              | na                                                          | na              | na             | na              | na              | na                    |
| miR-218-5p                      | 5.4                                      | 2.24E-03 | 1.60E-01             | 7               | na                                       | >0.05    | na                   | na              | na                                                          | na              | na             | na              | na              | na                    |
| miR-3591-5p                     | 3.8                                      | 4.01E-02 | 6.34E-01             | 5               | na                                       | >0.05    | na                   | na              | na                                                          | na              | na             | na              | na              | na                    |
| miR-4667-5p                     | 3.6                                      | 3.60E-02 | 5.91E-01             | 4               | na                                       | >0.05    | na                   | na              | na                                                          | na              | na             | na              | na              | na                    |
| miR-874-5p                      | 3.3                                      | 1.64E-02 | 4.54E-01             | 4               | na                                       | >0.05    | na                   | na              | na                                                          | na              | na             | na              | na              | na                    |
| miR-1                           | 3.0                                      | 5.46E-03 | 2.59E-01             | 531             | na                                       | >0.05    | na                   | na              | na                                                          | na              | na             | na              | na              | na                    |
| miR-202-3p                      | 2.9                                      | 4.68E-02 | 6.54E-01             | 6               | na                                       | >0.05    | na                   | na              | na                                                          | na              | na             | na              | na              | na                    |
| miR-133a-3p                     | 2.7                                      | 2.78E-02 | 5.16E-01             | 76              | na                                       | >0.05    | na                   | na              | na                                                          | na              | na             | na              | na              | na                    |
| miR-6767-5p                     | 2.7                                      | 1.95E-02 | 4.91E-01             | 7               | na                                       | >0.05    | na                   | na              | na                                                          | na              | na             | na              | na              | na                    |
| miR-6741-3p                     | 1.7                                      | 2.61E-02 | 5.07E-01             | 11              | na                                       | >0.05    | na                   | na              | na                                                          | na              | na             | na              | na              | na                    |
| miR-769-5p                      | -1.5                                     | 4.20E-02 | 6.40E-01             | 27              | na                                       | >0.05    | na                   | na              | na                                                          | na              | na             | na              | na              | na                    |
| miR-1277-5p                     | -1.8                                     | 2.35E-02 | 5.01E-01             | 13              | na                                       | >0.05    | na                   | na              | na                                                          | na              | na             | na              | na              | na                    |
| miR-221-5p                      | -1.9                                     | 3.03E-02 | 5.39E-01             | 9               | na                                       | >0.05    | na                   | na              | na                                                          | na              | na             | na              | na              | na                    |
| miR-2355-3p                     | -1.9                                     | 3.54E-02 | 5.91E-01             | 7               | na                                       | >0.05    | na                   | na              | na                                                          | na              | na             | na              | na              | na                    |
| miR-505-3p                      | -1.9                                     | 2.22E-02 | 5.01E-01             | 9               | na                                       | >0.05    | na                   | na              | na                                                          | na              | na             | na              | na              | na                    |
| miR-369-5p                      | -2.2                                     | 2.54E-02 | 5.07E-01             | 18              | na                                       | >0.05    | na                   | na              | na                                                          | na              | na             | na              | na              | na                    |
| miR-493-5p                      | -2.3                                     | 2.29E-02 | 5.01E-01             | 13              | na                                       | >0.05    | na                   | na              | na                                                          | na              | na             | na              | na              | na                    |
| miR-431-5p                      | -2.4                                     | 1.47E-02 | 4.49E-01             | 73              | na                                       | >0.05    | na                   | na              | na                                                          | na              | na             | na              | na              | na                    |
| miR-329-3p                      | -2.5                                     | 4.56E-02 | 6.54E-01             | 7               | na                                       | >0.05    | na                   | na              | na                                                          | na              | na             | na              | na              | na                    |
| miR-136-3p                      | -2.7                                     | 1.35E-02 | 4.45E-01             | 10              | na                                       | >0.05    | na                   | na              | na                                                          | na              | na             | na              | na              | na                    |
| miR-28-5p                       | -2.7                                     | 1.70E-02 | 4.54E-01             | 5               | na                                       | >0.05    | na                   | na              | na                                                          | na              | na             | na              | na              | na                    |
| miR-889-3p                      | -2.9                                     | 7.52E-03 | 3.21E-01             | 17              | na                                       | >0.05    | na                   | na              | na                                                          | na              | na             | na              | na              | na                    |
| miR-1292-5p                     | -3.6                                     | 8.28E-05 | 1.77E-02             | 8               | na                                       | >0.05    | na                   | na              | na                                                          | na              | na             | na              | na              | na                    |

Table S7. Continued.

| 95 miRs unique to cohort 4 | prior PE vs. NT pregnancy (ACS cohort 1) |         |                      |                 | prior PE vs. NT preg. (non-ACS cohort 2) |         |                      |                 | current PE vs NT pregnancy (cohort 4; published literature) |                 |                |                 |                 |                       |
|----------------------------|------------------------------------------|---------|----------------------|-----------------|------------------------------------------|---------|----------------------|-----------------|-------------------------------------------------------------|-----------------|----------------|-----------------|-----------------|-----------------------|
|                            | Fold Change                              | p value | FDR-adjusted p value | miR level (CPM) | Fold Change                              | p value | FDR-adjusted p value | miR level (CPM) | Li et al 2013                                               | Yang et al 2011 | Wu et al. 2012 | Yang et al 2015 | Ura et al. 2014 | Akehurst et al., 2015 |
| let-7a-3p                  | na                                       | >0.05   | na                   | na              | na                                       | >0.05   | na                   | na              |                                                             | Up              |                |                 |                 |                       |
| let-7d-5p                  | na                                       | >0.05   | na                   | na              | na                                       | >0.05   | na                   | na              |                                                             | Down            |                |                 |                 |                       |
| let-7f-1-3p                | na                                       | >0.05   | na                   | na              | na                                       | >0.05   | na                   | na              |                                                             | Up              |                |                 |                 |                       |
| let-7f-5p                  | na                                       | >0.05   | na                   | na              | na                                       | >0.05   | na                   | na              | Down                                                        | Down            |                |                 |                 |                       |
| miR-100-5p                 | na                                       | >0.05   | na                   | na              | na                                       | >0.05   | na                   | na              | Up                                                          |                 |                |                 |                 |                       |
| miR-101-3p                 | na                                       | >0.05   | na                   | na              | na                                       | >0.05   | na                   | na              | Up                                                          |                 |                |                 |                 |                       |
| miR-103a-3p                | na                                       | >0.05   | na                   | na              | na                                       | >0.05   | na                   | na              |                                                             |                 | Up             |                 |                 |                       |
| miR-107                    | na                                       | >0.05   | na                   | na              | na                                       | >0.05   | na                   | na              | Down                                                        |                 |                |                 |                 |                       |
| miR-10a-5p                 | na                                       | >0.05   | na                   | na              | na                                       | >0.05   | na                   | na              | Up                                                          |                 |                |                 |                 |                       |
| miR-114                    | na                                       | >0.05   | na                   | na              | na                                       | >0.05   | na                   | na              | Up                                                          |                 |                |                 |                 |                       |
| miR-1233-3p                | na                                       | >0.05   | na                   | na              | na                                       | >0.05   | na                   | na              |                                                             |                 |                |                 | Up              |                       |
| miR-125a-5p                | na                                       | >0.05   | na                   | na              | na                                       | >0.05   | na                   | na              | Up                                                          | Up              |                |                 |                 |                       |
| miR-126-3p                 | na                                       | >0.05   | na                   | na              | na                                       | >0.05   | na                   | na              |                                                             |                 |                | Up              | Down            |                       |
| miR-126-5p                 | na                                       | >0.05   | na                   | na              | na                                       | >0.05   | na                   | na              |                                                             |                 |                | Up/Down         |                 |                       |
| miR-1260a                  | na                                       | >0.05   | na                   | na              | na                                       | >0.05   | na                   | na              |                                                             | Down            |                |                 |                 |                       |
| miR-1272                   | na                                       | >0.05   | na                   | na              | na                                       | >0.05   | na                   | na              |                                                             | Down            |                |                 |                 |                       |
| miR-130a-3p                | na                                       | >0.05   | na                   | na              | na                                       | >0.05   | na                   | na              | Up                                                          |                 |                | Up              |                 |                       |
| miR-130b-3p                | na                                       | >0.05   | na                   | na              | na                                       | >0.05   | na                   | na              |                                                             |                 | Up             |                 |                 |                       |
| miR-135b-5p                | na                                       | >0.05   | na                   | na              | na                                       | >0.05   | na                   | na              |                                                             |                 |                | Up              |                 |                       |
| miR-136-5p                 | na                                       | >0.05   | na                   | na              | na                                       | >0.05   | na                   | na              |                                                             | Up              |                |                 |                 |                       |
| miR-142-3p                 | na                                       | >0.05   | na                   | na              | na                                       | >0.05   | na                   | na              |                                                             |                 |                | Up              |                 |                       |
| miR-144-3p                 | na                                       | >0.05   | na                   | na              | na                                       | >0.05   | na                   | na              | Up/down                                                     |                 | Down           |                 |                 |                       |
| miR-144-5p                 | na                                       | >0.05   | na                   | na              | na                                       | >0.05   | na                   | na              | Up                                                          |                 |                |                 |                 |                       |
| miR-145-5p                 | na                                       | >0.05   | na                   | na              | na                                       | >0.05   | na                   | na              | Up                                                          |                 | Up             |                 |                 |                       |
| miR-149-5p                 | na                                       | >0.05   | na                   | na              | na                                       | >0.05   | na                   | na              |                                                             |                 |                | Up              |                 |                       |
| miR-151a-3p                | na                                       | >0.05   | na                   | na              | na                                       | >0.05   | na                   | na              |                                                             |                 | Up             |                 |                 |                       |
| miR-152-3p                 | na                                       | >0.05   | na                   | na              | na                                       | >0.05   | na                   | na              |                                                             |                 |                |                 | Up              |                       |
| miR-15b-3p                 | na                                       | >0.05   | na                   | na              | na                                       | >0.05   | na                   | na              | Up                                                          |                 |                |                 |                 |                       |
| miR-15b-5p                 | na                                       | >0.05   | na                   | na              | na                                       | >0.05   | na                   | na              | Down                                                        |                 |                |                 | Down            |                       |
| miR-16-5p                  | na                                       | >0.05   | na                   | na              | na                                       | >0.05   | na                   | na              |                                                             |                 | Down           |                 |                 |                       |
| miR-181a-5p                | na                                       | >0.05   | na                   | na              | na                                       | >0.05   | na                   | na              |                                                             |                 | Up             |                 |                 |                       |
| miR-182-5p                 | na                                       | >0.05   | na                   | na              | na                                       | >0.05   | na                   | na              | Up                                                          |                 |                |                 |                 |                       |
| miR-185-5p                 | na                                       | >0.05   | na                   | na              | na                                       | >0.05   | na                   | na              | Down                                                        | Down            |                |                 |                 |                       |
| miR-188-5p                 | na                                       | >0.05   | na                   | na              | na                                       | >0.05   | na                   | na              |                                                             |                 |                | Up              |                 |                       |
| miR-18a-5p                 | na                                       | >0.05   | na                   | na              | na                                       | >0.05   | na                   | na              | Up                                                          |                 |                | Up              |                 |                       |
| miR-18b-5p                 | na                                       | >0.05   | na                   | na              | na                                       | >0.05   | na                   | na              |                                                             |                 |                | Up              |                 |                       |
| miR-193a-3p                | na                                       | >0.05   | na                   | na              | na                                       | >0.05   | na                   | na              |                                                             |                 |                |                 | Up              |                       |
| miR-196b-5p                | na                                       | >0.05   | na                   | na              | na                                       | >0.05   | na                   | na              |                                                             |                 |                |                 |                 | Up                    |
| miR-199a-5p                | na                                       | >0.05   | na                   | na              | na                                       | >0.05   | na                   | na              | Up                                                          |                 |                |                 |                 |                       |
| miR-19a-3p                 | na                                       | >0.05   | na                   | na              | na                                       | >0.05   | na                   | na              | Up/down                                                     |                 |                |                 |                 |                       |
| miR-19b-3p                 | na                                       | >0.05   | na                   | na              | na                                       | >0.05   | na                   | na              | Down/Up                                                     |                 |                |                 |                 |                       |
| miR-203a-3p                | na                                       | >0.05   | na                   | na              | na                                       | >0.05   | na                   | na              |                                                             |                 |                | Up              |                 |                       |
| miR-21-5p                  | na                                       | >0.05   | na                   | na              | na                                       | >0.05   | na                   | na              | Up                                                          |                 |                |                 |                 |                       |
| miR-210-3p                 | na                                       | >0.05   | na                   | na              | na                                       | >0.05   | na                   | na              |                                                             |                 |                |                 | Up              |                       |
| miR-215-5p                 | na                                       | >0.05   | na                   | na              | na                                       | >0.05   | na                   | na              |                                                             |                 |                |                 | Up              |                       |
| miR-221-3p                 | na                                       | >0.05   | na                   | na              | na                                       | >0.05   | na                   | na              | Up                                                          |                 | Up             |                 |                 |                       |
| miR-223-3p                 | na                                       | >0.05   | na                   | na              | na                                       | >0.05   | na                   | na              | Down                                                        | Down            |                |                 |                 |                       |

Table S7. Continued.

|             |    |       |    |    |    |       |    |    |         |      |         |    |      |      |
|-------------|----|-------|----|----|----|-------|----|----|---------|------|---------|----|------|------|
| miR-224-5p  | na | >0.05 | na | na | na | >0.05 | na | na |         |      |         | Up |      |      |
| miR-23a-3p  | na | >0.05 | na | na | na | >0.05 | na | na | Up      |      |         |    |      |      |
| miR-23a-5p  | na | >0.05 | na | na | na | >0.05 | na | na |         |      |         |    |      | Down |
| miR-23b-3p  | na | >0.05 | na | na | na | >0.05 | na | na | Up      |      |         |    |      |      |
| miR-24-3p   | na | >0.05 | na | na | na | >0.05 | na | na | Up      |      |         |    |      |      |
| miR-25-3p   | na | >0.05 | na | na | na | >0.05 | na | na | Down/Up |      |         |    |      |      |
| miR-26a-5p  | na | >0.05 | na | na | na | >0.05 | na | na |         |      | Up      |    |      |      |
| miR-26b-5p  | na | >0.05 | na | na | na | >0.05 | na | na | UP      |      |         |    |      |      |
| miR-27a-3p  | na | >0.05 | na | na | na | >0.05 | na | na | UP      |      |         | Up |      |      |
| miR-296-5p  | na | >0.05 | na | na | na | >0.05 | na | na |         |      |         |    | Up   |      |
| miR-29b-3p  | na | >0.05 | na | na | na | >0.05 | na | na | Up      |      |         |    |      |      |
| miR-29c-3p  | na | >0.05 | na | na | na | >0.05 | na | na | Up      |      |         |    |      |      |
| miR-301a-3p | na | >0.05 | na | na | na | >0.05 | na | na |         |      |         | Up |      |      |
| miR-30d-5p  | na | >0.05 | na | na | na | >0.05 | na | na |         |      | Up      |    |      |      |
| miR-32-5p   | na | >0.05 | na | na | na | >0.05 | na | na |         |      |         |    | Up   |      |
| miR-320c    | na | >0.05 | na | na | na | >0.05 | na | na | Down    | Down |         |    |      |      |
| miR-335-5p  | na | >0.05 | na | na | na | >0.05 | na | na |         |      |         |    | Down |      |
| miR-342-3p  | na | >0.05 | na | na | na | >0.05 | na | na |         |      | Up      |    |      |      |
| miR-34a-5p  | na | >0.05 | na | na | na | >0.05 | na | na | Up      |      |         |    |      |      |
| miR-378a-3p | na | >0.05 | na | na | na | >0.05 | na | na | Up      |      |         |    |      |      |
| miR-424-5p  | na | >0.05 | na | na | na | >0.05 | na | na | Up      |      |         |    |      |      |
| miR-425-5p  | na | >0.05 | na | na | na | >0.05 | na | na |         |      | Up      |    |      |      |
| miR-451a    | na | >0.05 | na | na | na | >0.05 | na | na | Down    |      |         |    |      |      |
| miR-502-5p  | na | >0.05 | na | na | na | >0.05 | na | na |         |      |         |    |      | Up   |
| miR-503-5p  | na | >0.05 | na | na | na | >0.05 | na | na |         |      |         |    |      | Up   |
| miR-512-5p  | na | >0.05 | na | na | na | >0.05 | na | na | Up      |      |         |    |      |      |
| miR-515-3p  | na | >0.05 | na | na | na | >0.05 | na | na | Up      |      |         |    |      |      |
| miR-517b-3p | na | >0.05 | na | na | na | >0.05 | na | na | Up      | Up   |         |    |      |      |
| miR-517c-3p | na | >0.05 | na | na | na | >0.05 | na | na | Up      | Up   |         | Up |      |      |
| miR-518a-3p | na | >0.05 | na | na | na | >0.05 | na | na |         |      |         | Up |      |      |
| miR-518b    | na | >0.05 | na | na | na | >0.05 | na | na | Up      |      |         |    |      |      |
| miR-518c-3p | na | >0.05 | na | na | na | >0.05 | na | na | Up      |      |         |    |      |      |
| miR-518e-3p | na | >0.05 | na | na | na | >0.05 | na | na |         | Up   |         | Up |      |      |
| miR-519a-3p | na | >0.05 | na | na | na | >0.05 | na | na | Up      | Up   |         |    |      |      |
| miR-519d-3p | na | >0.05 | na | na | na | >0.05 | na | na | Up      | Up   |         | Up |      |      |
| miR-519e-3p | na | >0.05 | na | na | na | >0.05 | na | na | Up      |      |         |    |      |      |
| miR-520a-3p | na | >0.05 | na | na | na | >0.05 | na | na |         |      |         |    | Up   |      |
| miR-520g-3p | na | >0.05 | na | na | na | >0.05 | na | na |         | Up   |         |    |      |      |
| miR-520h    | na | >0.05 | na | na | na | >0.05 | na | na | Up      | Up   |         |    |      |      |
| miR-521     | na | >0.05 | na | na | na | >0.05 | na | na | Up      | Up   |         |    |      |      |
| miR-525-3p  | na | >0.05 | na | na | na | >0.05 | na | na | Up      |      |         |    |      |      |
| miR-542-3p  | na | >0.05 | na | na | na | >0.05 | na | na |         | Up   |         |    |      |      |
| miR-574-5p  | na | >0.05 | na | na | na | >0.05 | na | na |         |      | Up      |    |      |      |
| miR-650     | na | >0.05 | na | na | na | >0.05 | na | na |         |      |         |    | Up   |      |
| miR-668-3p  | na | >0.05 | na | na | na | >0.05 | na | na |         |      |         |    | Down |      |
| miR-758-3p  | na | >0.05 | na | na | na | >0.05 | na | na |         |      |         |    |      | Up   |
| miR-93-5p   | na | >0.05 | na | na | na | >0.05 | na | na |         |      | Up/Down |    |      |      |
| miR-299-5p  | na | >0.05 | na | na | na | >0.05 | na | na | Up      |      |         |    |      |      |

**Table S8. Number of differentially altered miRNAs that target each gene implicated in the Wnt signaling pathway.** Data is stratified by cohort and the database that was used for miRNA-target integration. T: TargetsCan7.2 (predicted). M: miRTarBase7.0 (experimentally-validated).

| Gene Targets | prior PE vs. NT pregnancy (Cohort 1) |   | prior PE vs. NT pregnancy (Cohort 2) |   | ACS vs non-ACS (Cohort 3) |    | current PE vs NT pregnancy (cohort 4; literature) |    |
|--------------|--------------------------------------|---|--------------------------------------|---|---------------------------|----|---------------------------------------------------|----|
|              | T                                    | M | T                                    | M | T                         | M  | T                                                 | M  |
| NFAT5        | 2                                    | 4 | 7                                    | 4 | 39                        | 17 | 27                                                | 12 |
| CCND2        | 1                                    | 4 | 3                                    | 3 | 36                        | 35 | 26                                                | 23 |
| SMAD2        | 3                                    | 3 | 3                                    | 2 | 32                        | 20 | 20                                                | 15 |
| CSNK2A1      | 3                                    | 1 | 3                                    | 3 | 26                        | 22 | 16                                                | 15 |
| NFATC3       | 3                                    | 1 | 5                                    | 1 | 19                        | 4  | 13                                                | 1  |
| CCND1        | 1                                    | 3 | 1                                    | 4 | 16                        | 37 | 15                                                | 26 |
| GSK3B        | 2                                    | 2 | 2                                    | 3 | 20                        | 23 | 15                                                | 14 |
| PPP3R1       | 1                                    | 1 | 3                                    | 3 | 23                        | 9  | 18                                                | 8  |
| MAPK8        | 1                                    | 2 | 2                                    | 1 | 28                        | 13 | 21                                                | 8  |
| PPP3CB       | 3                                    | 1 | 1                                    | 1 | 11                        | 5  | 6                                                 | 3  |
| ROCK2        | 1                                    | 2 | 2                                    | 1 | 20                        | 7  | 16                                                | 7  |
| TCF7L2       | 2                                    | 1 | 2                                    | 1 | 16                        | 12 | 7                                                 | 8  |
| APC          | 1                                    | 1 | 2                                    | 1 | 25                        | 9  | 15                                                | 7  |
| PPP2CA       | 1                                    | 1 | 2                                    | 1 | 17                        | 8  | 9                                                 | 5  |
| SFRP1        | 1                                    | 2 | 1                                    | 1 | 5                         | 12 | 3                                                 | 4  |
| TBL1XR1      | 1                                    | 1 | 2                                    | 1 | 29                        | 19 | 22                                                | 6  |
| PPP2R5C      | 1                                    | 1 | 1                                    | 1 | 11                        | 9  | 9                                                 | 9  |
| FZD4         | 0                                    | 0 | 3                                    | 1 | 34                        | 8  | 22                                                | 7  |
| TP53         | 0                                    | 0 | 2                                    | 2 | 12                        | 30 | 4                                                 | 17 |
| SMAD4        | 0                                    | 0 | 1                                    | 3 | 5                         | 21 | 3                                                 | 24 |
| FRAT2        | 0                                    | 0 | 2                                    | 2 | 7                         | 12 | 8                                                 | 4  |
| FZD8         | 0                                    | 0 | 3                                    | 1 | 17                        | 3  | 6                                                 | 3  |
| CTNBP1       | 0                                    | 0 | 2                                    | 1 | 19                        | 6  | 17                                                | 6  |
| DVL3         | 0                                    | 0 | 2                                    | 1 | 12                        | 12 | 7                                                 | 8  |
| PPP3CA       | 0                                    | 0 | 2                                    | 1 | 20                        | 1  | 13                                                | 3  |
| WNT1         | 0                                    | 0 | 1                                    | 2 | 14                        | 6  | 9                                                 | 2  |
| CAMK2G       | 0                                    | 0 | 2                                    | 1 | 15                        | 3  | 8                                                 | 2  |
| PPP2R1B      | 0                                    | 0 | 1                                    | 2 | 8                         | 7  | 5                                                 | 7  |
| TCF7         | 0                                    | 0 | 2                                    | 1 | 6                         | 4  | 4                                                 | 2  |
| EP300        | 0                                    | 0 | 1                                    | 1 | 10                        | 15 | 4                                                 | 7  |
| FOSL1        | 0                                    | 0 | 1                                    | 1 | 11                        | 7  | 11                                                | 3  |
| RHOA         | 0                                    | 0 | 1                                    | 1 | 5                         | 16 | 0                                                 | 0  |
| NLK          | 3                                    | 2 | 0                                    | 0 | 33                        | 11 | 20                                                | 6  |
| LRP6         | 3                                    | 2 | 0                                    | 0 | 35                        | 9  | 17                                                | 7  |
| PRKCA        | 2                                    | 2 | 0                                    | 0 | 12                        | 5  | 2                                                 | 3  |
| CSNK1A1      | 2                                    | 1 | 0                                    | 0 | 22                        | 11 | 15                                                | 9  |
| FZD5         | 1                                    | 2 | 0                                    | 0 | 23                        | 10 | 12                                                | 11 |
| PPP2R5E      | 1                                    | 2 | 0                                    | 0 | 23                        | 8  | 15                                                | 8  |
| ROCK1        | 2                                    | 1 | 0                                    | 0 | 25                        | 6  | 16                                                | 4  |
| VANGL2       | 2                                    | 1 | 0                                    | 0 | 17                        | 5  | 8                                                 | 3  |
| WNT5A        | 1                                    | 2 | 0                                    | 0 | 10                        | 8  | 2                                                 | 5  |
| CREBBP       | 1                                    | 2 | 0                                    | 0 | 9                         | 6  | 4                                                 | 2  |
| FZD2         | 1                                    | 2 | 0                                    | 0 | 6                         | 7  | 4                                                 | 2  |
| DKK2         | 2                                    | 1 | 0                                    | 0 | 8                         | 3  | 3                                                 | 3  |
| LEF1         | 1                                    | 1 | 0                                    | 0 | 5                         | 2  | 5                                                 | 1  |
| NFATC2       | 4                                    | 1 | 0                                    | 0 | 27                        | 3  | 0                                                 | 0  |
| AXIN1        | 1                                    | 1 | 0                                    | 0 | 3                         | 3  | 0                                                 | 0  |

**Table S8. Continued**

| Gene Targets | prior PE vs. NT pregnancy (Cohort 1) |   | prior PE vs. NT pregnancy (Cohort 2) |   | ACS vs non-ACS (Cohort 3) |    | current PE vs NT pregnancy (cohort 4; literature) |    |
|--------------|--------------------------------------|---|--------------------------------------|---|---------------------------|----|---------------------------------------------------|----|
|              | T                                    | M | T                                    | M | T                         | M  | T                                                 | M  |
| FZD6         | 0                                    | 0 | 0                                    | 0 | 10                        | 26 | 10                                                | 19 |
| VANG1        | 0                                    | 0 | 0                                    | 0 | 20                        | 8  | 17                                                | 3  |
| PRICKLE2     | 0                                    | 0 | 0                                    | 0 | 16                        | 7  | 12                                                | 10 |
| PRKACB       | 0                                    | 0 | 0                                    | 0 | 17                        | 3  | 16                                                | 7  |
| WNT2B        | 0                                    | 0 | 0                                    | 0 | 22                        | 5  | 14                                                | 2  |
| RAC1         | 0                                    | 0 | 0                                    | 0 | 11                        | 19 | 2                                                 | 7  |
| SMAD3        | 0                                    | 0 | 0                                    | 0 | 8                         | 16 | 6                                                 | 8  |
| DAAM1        | 0                                    | 0 | 0                                    | 0 | 18                        | 2  | 15                                                | 2  |
| AXIN2        | 0                                    | 0 | 0                                    | 0 | 9                         | 13 | 8                                                 | 6  |
| NKD1         | 0                                    | 0 | 0                                    | 0 | 17                        | 7  | 8                                                 | 4  |
| BTRC         | 0                                    | 0 | 0                                    | 0 | 12                        | 9  | 9                                                 | 4  |
| CCND3        | 0                                    | 0 | 0                                    | 0 | 12                        | 8  | 8                                                 | 6  |
| WNT9B        | 0                                    | 0 | 0                                    | 0 | 17                        | 5  | 8                                                 | 1  |
| MAP3K7       | 0                                    | 0 | 0                                    | 0 | 7                         | 11 | 4                                                 | 8  |
| TBL1X        | 0                                    | 0 | 0                                    | 0 | 15                        | 3  | 10                                                | 2  |
| MAPK10       | 0                                    | 0 | 0                                    | 0 | 10                        | 5  | 11                                                | 2  |
| CTNNB1       | 0                                    | 0 | 0                                    | 0 | 2                         | 15 | 1                                                 | 9  |
| WNT4         | 0                                    | 0 | 0                                    | 0 | 10                        | 4  | 8                                                 | 4  |
| FBXW11       | 0                                    | 0 | 0                                    | 0 | 13                        | 2  | 9                                                 | 1  |
| PRICKLE1     | 0                                    | 0 | 0                                    | 0 | 10                        | 6  | 6                                                 | 3  |
| WNT3A        | 0                                    | 0 | 0                                    | 0 | 11                        | 4  | 7                                                 | 3  |
| SENP2        | 0                                    | 0 | 0                                    | 0 | 11                        | 6  | 6                                                 | 1  |
| CAMK2D       | 0                                    | 0 | 0                                    | 0 | 10                        | 1  | 10                                                | 1  |
| SIAH1        | 0                                    | 0 | 0                                    | 0 | 11                        | 2  | 7                                                 | 2  |
| PRKX         | 0                                    | 0 | 0                                    | 0 | 6                         | 8  | 4                                                 | 3  |
| WNT7B        | 0                                    | 0 | 0                                    | 0 | 5                         | 6  | 6                                                 | 4  |
| DAAM2        | 0                                    | 0 | 0                                    | 0 | 6                         | 3  | 8                                                 | 3  |
| WNT10B       | 0                                    | 0 | 0                                    | 0 | 10                        | 2  | 7                                                 | 1  |
| PPARD        | 0                                    | 0 | 0                                    | 0 | 5                         | 6  | 6                                                 | 2  |
| WNT9A        | 0                                    | 0 | 0                                    | 0 | 10                        | 1  | 7                                                 | 1  |
| CTBP2        | 0                                    | 0 | 0                                    | 0 | 10                        | 3  | 4                                                 | 1  |
| PPP2R1A      | 0                                    | 0 | 0                                    | 0 | 6                         | 6  | 4                                                 | 1  |
| WNT10A       | 0                                    | 0 | 0                                    | 0 | 4                         | 4  | 5                                                 | 4  |
| WNT7A        | 0                                    | 0 | 0                                    | 0 | 7                         | 4  | 4                                                 | 2  |
| FZD7         | 0                                    | 0 | 0                                    | 0 | 2                         | 8  | 1                                                 | 5  |
| SOX17        | 0                                    | 0 | 0                                    | 0 | 7                         | 4  | 3                                                 | 2  |
| WIF1         | 0                                    | 0 | 0                                    | 0 | 8                         | 1  | 4                                                 | 3  |
| WNT3         | 0                                    | 0 | 0                                    | 0 | 7                         | 3  | 4                                                 | 2  |
| PRKCB        | 0                                    | 0 | 0                                    | 0 | 3                         | 8  | 1                                                 | 3  |
| PRKACA       | 0                                    | 0 | 0                                    | 0 | 4                         | 4  | 4                                                 | 1  |
| CHD8         | 0                                    | 0 | 0                                    | 0 | 6                         | 4  | 1                                                 | 1  |
| WNT16        | 0                                    | 0 | 0                                    | 0 | 4                         | 5  | 2                                                 | 1  |
| DKK1         | 0                                    | 0 | 0                                    | 0 | 2                         | 3  | 3                                                 | 3  |
| PLCB4        | 0                                    | 0 | 0                                    | 0 | 8                         | 1  | 1                                                 | 1  |
| PPP2R5A      | 0                                    | 0 | 0                                    | 0 | 4                         | 1  | 5                                                 | 1  |
| SFRP4        | 0                                    | 0 | 0                                    | 0 | 3                         | 2  | 4                                                 | 2  |
| FZD1         | 0                                    | 0 | 0                                    | 0 | 1                         | 3  | 1                                                 | 3  |
| DVL2         | 0                                    | 0 | 0                                    | 0 | 4                         | 1  | 1                                                 | 1  |
| FZD10        | 0                                    | 0 | 0                                    | 0 | 3                         | 1  | 2                                                 | 1  |
| PPP2CB       | 0                                    | 0 | 0                                    | 0 | 2                         | 3  | 1                                                 | 1  |
| RUVBL1       | 0                                    | 0 | 0                                    | 0 | 2                         | 2  | 1                                                 | 1  |
| WNT2         | 0                                    | 0 | 0                                    | 0 | 1                         | 1  | 2                                                 | 2  |

**Table S8. Continued**

| Gene Targets | prior PE vs. NT pregnancy (Cohort 1) |   | prior PE vs. NT pregnancy (Cohort 2) |   | ACS vs non-ACS (Cohort 3) |   | current PE vs NT pregnancy (cohort 4; literature) |   |
|--------------|--------------------------------------|---|--------------------------------------|---|---------------------------|---|---------------------------------------------------|---|
|              | T                                    | M | T                                    | M | T                         | M | T                                                 | M |
| FZD3         | 0                                    | 0 | 0                                    | 0 | 32                        | 2 | 0                                                 | 0 |
| SKP1         | 0                                    | 0 | 0                                    | 0 | 11                        | 6 | 0                                                 | 0 |
| CAMK2A       | 0                                    | 0 | 0                                    | 0 | 12                        | 3 | 0                                                 | 0 |
| PLCB1        | 0                                    | 0 | 0                                    | 0 | 12                        | 3 | 0                                                 | 0 |
| PSEN1        | 0                                    | 0 | 0                                    | 0 | 10                        | 1 | 0                                                 | 0 |
| JUN          | 0                                    | 0 | 0                                    | 0 | 2                         | 8 | 0                                                 | 0 |
| APC2         | 0                                    | 0 | 0                                    | 0 | 7                         | 1 | 0                                                 | 0 |
| TCF7L1       | 0                                    | 0 | 0                                    | 0 | 4                         | 4 | 0                                                 | 0 |
| CTBP1        | 0                                    | 0 | 0                                    | 0 | 1                         | 5 | 0                                                 | 0 |
| PPP2R5D      | 0                                    | 0 | 0                                    | 0 | 3                         | 3 | 0                                                 | 0 |
| CACYBP       | 0                                    | 0 | 0                                    | 0 | 4                         | 1 | 0                                                 | 0 |
| RBX1         | 0                                    | 0 | 0                                    | 0 | 2                         | 3 | 0                                                 | 0 |
| FRAT1        | 0                                    | 0 | 0                                    | 0 | 1                         | 3 | 0                                                 | 0 |
| NFATC1       | 0                                    | 0 | 0                                    | 0 | 1                         | 3 | 0                                                 | 0 |
| PLCB3        | 0                                    | 0 | 0                                    | 0 | 1                         | 1 | 0                                                 | 0 |
| PORCN        | 0                                    | 0 | 0                                    | 0 | 1                         | 1 | 0                                                 | 0 |
| SFRP2        | 0                                    | 0 | 0                                    | 0 | 1                         | 1 | 0                                                 | 0 |
| CXXC4        | 0                                    | 0 | 0                                    | 0 | 0                         | 0 | 4                                                 | 1 |
| DVL1         | 0                                    | 0 | 0                                    | 0 | 0                         | 0 | 1                                                 | 3 |
| LRP5         | 0                                    | 0 | 0                                    | 0 | 0                         | 0 | 2                                                 | 2 |
| PPP3R2       | 0                                    | 0 | 0                                    | 0 | 0                         | 0 | 1                                                 | 1 |

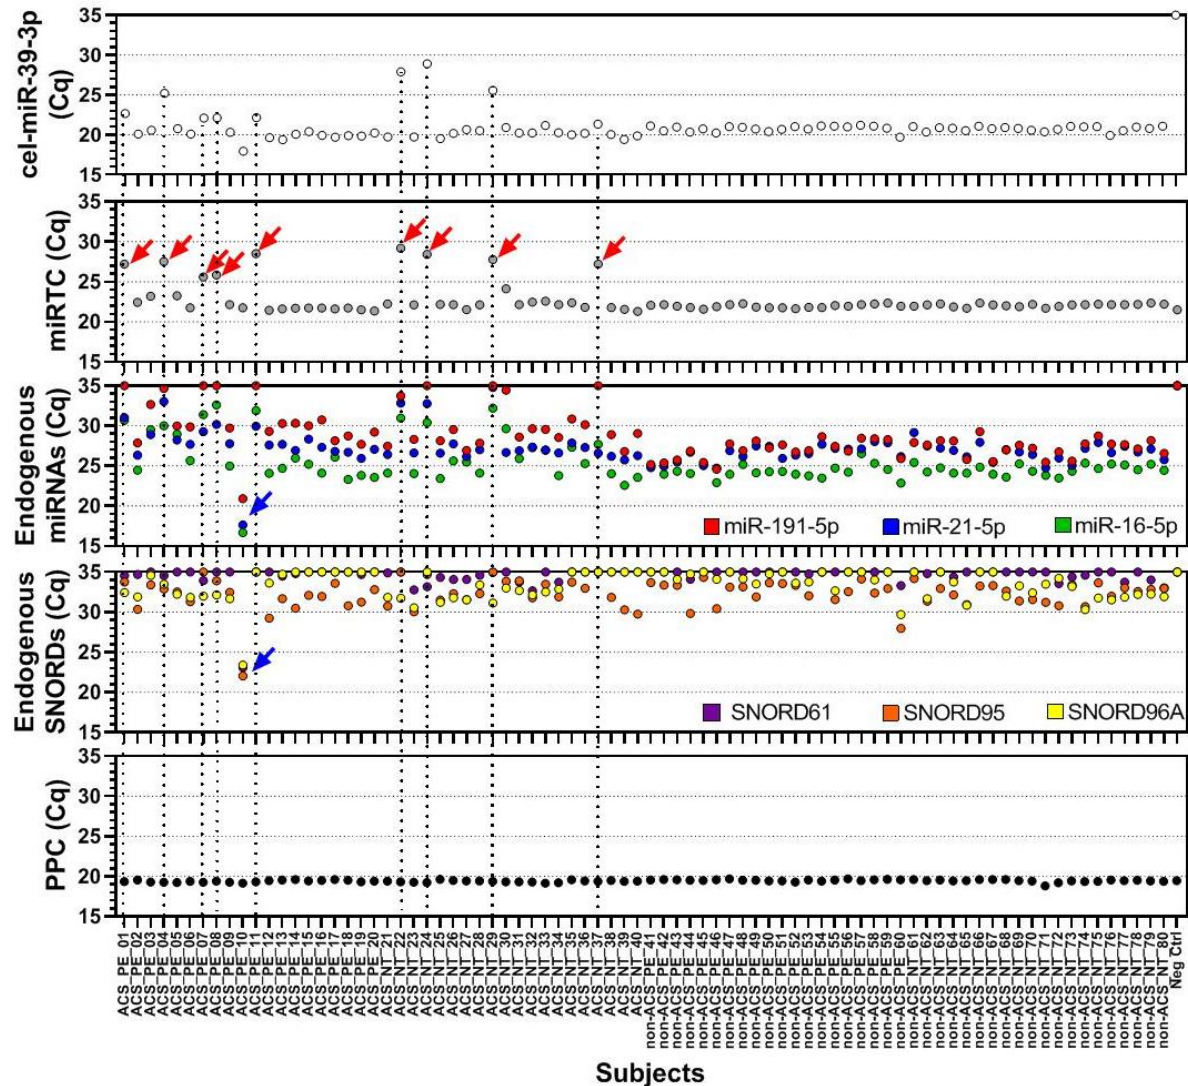

**Figure S1. Quality control assessment of total RNA extracted from plasma using the miScript miRNA QC PCR array.** The PCR array contains primer assays for several external spike-in controls introduced in fixed quantities at different stages in the RNA extraction and downstream RT-qPCR reactions. Cel-miR-39-3p (a miRNA mimic with no mammalian homolog) is added at the beginning of RNA extraction just after chemical denaturation of nucleases to assess variations in RNA extraction efficiency. miRTC (a synthetic RNA molecule) is incorporated into the reverse transcription reaction to monitor relative reaction efficiencies. PPC is a positive PCR control (synthetic DNA molecule) used to monitor the relative efficiency of downstream PCR reactions. In addition, primer assays for several endogenous miRNAs (i.e., miR-16, miR-21 and miR-191) are included as positive controls since these miRNAs are ubiquitously expressed across many different biologic specimens including body fluids, and several endogenous small nuclear/nucleolar RNAs (i.e., SNORD61, SNORD95, and SNORD96A) are included as negative controls (or markers of cellular contamination) since these are typically expressed abundantly in cells, but relatively poorly in body fluids. Each panel shows the PCR quantification cycles (Cq) assessed for different analytes across all 80 subjects. Each subject is denoted by the cohort (i.e., ACS or non-ACS), prior preeclampsia (PE) or normotensive pregnancy (NT) exposure, and a unique numerical identifier. Red arrows denote subject samples that were flagged for inhibition of the reverse transcription control (miRTC). In most cases these flagged subjects also showed a concomitant decrease in the levels (i.e., higher Cq values) of the external spike-in cel-miR-39-3p and several endogenous miRNAs. Blue arrow denotes a subject sample that showed a marked increase (i.e., lower Cq values) in the levels of both endogenous miRNAs and SNORDs, indicative of potential cellular contamination. Neg Ctrl denotes a mock RNA extraction performed with water instead of plasma. Overall, the majority of samples showed relatively consistent levels in both external and endogenous controls suggesting that the quality and quantity of extracted RNA was generally comparable between samples.

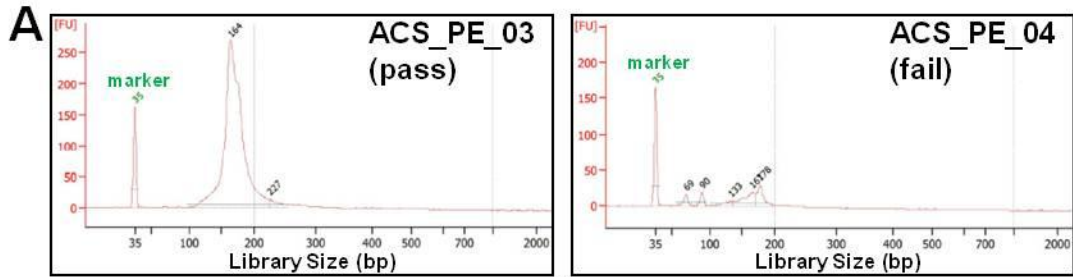

**B**

| Subject (Cohort 1) | QC1: qPCR | QC2: Library | Sequencing Performed? |
|--------------------|-----------|--------------|-----------------------|
| ACS_PE_01          | pass      | pass         | yes                   |
| ACS_PE_02          | pass      | pass         | yes                   |
| ACS_PE_03          | pass      | pass         | yes                   |
| ACS_PE_04          | fail      | fail         | no                    |
| ACS_PE_05          | pass      | pass         | yes                   |
| ACS_PE_06          | pass      | pass         | yes                   |
| ACS_PE_07          | fail      | pass         | yes                   |
| ACS_PE_08          | fail      | pass         | yes                   |
| ACS_PE_09          | pass      | pass         | yes                   |
| ACS_PE_10          | pass      | fail         | no                    |
| ACS_PE_11          | fail      | pass         | yes                   |
| ACS_PE_12          | pass      | pass         | yes                   |
| ACS_PE_13          | pass      | pass         | yes                   |
| ACS_PE_14          | pass      | pass         | yes                   |
| ACS_PE_15          | pass      | pass         | yes                   |
| ACS_PE_16          | pass      | pass         | yes                   |
| ACS_PE_17          | pass      | pass         | yes                   |
| ACS_PE_18          | pass      | pass         | yes                   |
| ACS_PE_19          | pass      | pass         | yes                   |
| ACS_PE_20          | pass      | pass         | yes                   |
| ACS_NT_21          | pass      | pass         | yes                   |
| ACS_NT_22          | fail      | pass         | yes                   |
| ACS_NT_23          | pass      | pass         | yes                   |
| ACS_NT_24          | fail      | fail         | no                    |
| ACS_NT_25          | pass      | pass         | yes                   |
| ACS_NT_26          | pass      | pass         | yes                   |
| ACS_NT_27          | pass      | pass         | yes                   |
| ACS_NT_28          | pass      | pass         | yes                   |
| ACS_NT_29          | fail      | pass         | yes                   |
| ACS_NT_30          | pass      | pass         | yes                   |
| ACS_NT_31          | pass      | pass         | yes                   |
| ACS_NT_32          | pass      | pass         | yes                   |
| ACS_NT_33          | pass      | pass         | yes                   |
| ACS_NT_34          | pass      | pass         | yes                   |
| ACS_NT_35          | pass      | pass         | yes                   |
| ACS_NT_36          | pass      | pass         | yes                   |
| ACS_NT_37          | fail      | pass         | yes                   |
| ACS_NT_38          | pass      | pass         | yes                   |
| ACS_NT_39          | pass      | pass         | yes                   |
| ACS_NT_40          | pass      | pass         | yes                   |

  

| Subject (Cohort 2) | QC1: qPCR | QC2: Library | Sequencing Performed? |
|--------------------|-----------|--------------|-----------------------|
| non-ACS_PE_41      | pass      | pass         | yes                   |
| non-ACS_PE_42      | pass      | pass         | yes                   |
| non-ACS_PE_43      | pass      | pass         | yes                   |
| non-ACS_PE_44      | pass      | pass         | yes                   |
| non-ACS_PE_45      | pass      | pass         | yes                   |
| non-ACS_PE_46      | pass      | pass         | yes                   |
| non-ACS_PE_47      | pass      | pass         | yes                   |
| non-ACS_PE_48      | pass      | pass         | yes                   |
| non-ACS_PE_49      | pass      | pass         | yes                   |
| non-ACS_PE_50      | pass      | pass         | yes                   |
| non-ACS_PE_51      | pass      | pass         | yes                   |
| non-ACS_PE_52      | pass      | pass         | yes                   |
| non-ACS_PE_53      | pass      | pass         | yes                   |
| non-ACS_PE_54      | pass      | pass         | yes                   |
| non-ACS_PE_55      | pass      | pass         | yes                   |
| non-ACS_PE_56      | pass      | pass         | yes                   |
| non-ACS_PE_57      | pass      | pass         | yes                   |
| non-ACS_PE_58      | pass      | pass         | yes                   |
| non-ACS_PE_59      | pass      | pass         | yes                   |
| non-ACS_PE_60      | pass      | pass         | yes                   |
| non-ACS_NT_61      | pass      | pass         | yes                   |
| non-ACS_NT_62      | pass      | pass         | yes                   |
| non-ACS_NT_63      | pass      | pass         | yes                   |
| non-ACS_NT_64      | pass      | pass         | yes                   |
| non-ACS_NT_65      | pass      | pass         | yes                   |
| non-ACS_NT_66      | pass      | pass         | yes                   |
| non-ACS_NT_67      | pass      | pass         | yes                   |
| non-ACS_NT_68      | pass      | pass         | yes                   |
| non-ACS_NT_69      | pass      | pass         | yes                   |
| non-ACS_NT_70      | pass      | pass         | yes                   |
| non-ACS_NT_71      | pass      | pass         | yes                   |
| non-ACS_NT_72      | pass      | pass         | yes                   |
| non-ACS_NT_73      | pass      | pass         | yes                   |
| non-ACS_NT_74      | pass      | pass         | yes                   |
| non-ACS_NT_75      | pass      | pass         | yes                   |
| non-ACS_NT_76      | pass      | pass         | yes                   |
| non-ACS_NT_77      | pass      | pass         | yes                   |
| non-ACS_NT_78      | pass      | pass         | yes                   |
| non-ACS_NT_79      | pass      | pass         | yes                   |
| non-ACS_NT_80      | pass      | pass         | yes                   |

**Figure S2. Quality control assessment of sequencing libraries.** Library qualification was performed on an Agilent Bioanalyzer using High Sensitivity DNA Chips (A) Electropherogram showing DNA library levels (in arbitrary fluorescence units, FU) versus size in base-pairs (bp). Left panel is an example of a library (generated for subject ACS\_PE\_03) that showed good yield and was considered to pass this quality control step. Right panel is an example of a library (generated for subject ACS\_PE\_04) that showed poor yield and quality (consistent with prior PCR QC assays), and therefore was not sequenced. (B) Summary of quality control assays for all 80 subjects. Each subject is denoted by the cohort (i.e., ACS or non-ACS), prior preeclampsia (PE) or normotensive pregnancy (NT) exposure, and a unique numerical identifier. Pass or fail outcomes are indicated for quality control assays conducted with either the plasma-extracted total RNA (i.e., for QC1 using RT-qPCR assays) or subsequently derived next-generation DNA sequencing libraries (i.e., QC2). Four subjects were not sequenced after failing both the PCR and library QC steps. An additional subject (ACS\_PE\_10; denoted in blue) was not sequenced because it showed evidence of cellular contamination via qPCR assay (i.e., marked elevation in levels of endogenous miRNAs and SNORDs). Virtual gel-like images are presented for each subject to show the quality of the sequencing libraries. Each gel-like image was generated from the corresponding Bioanalyzer electropherogram and manually compiled for presentation. Of note, the extracted RNA from subjects 01,07,08,11 and 37 was flagged for quality issues in the qPCR QC assays, but still generated libraries with sufficient yield/quality to conduct sequencing.



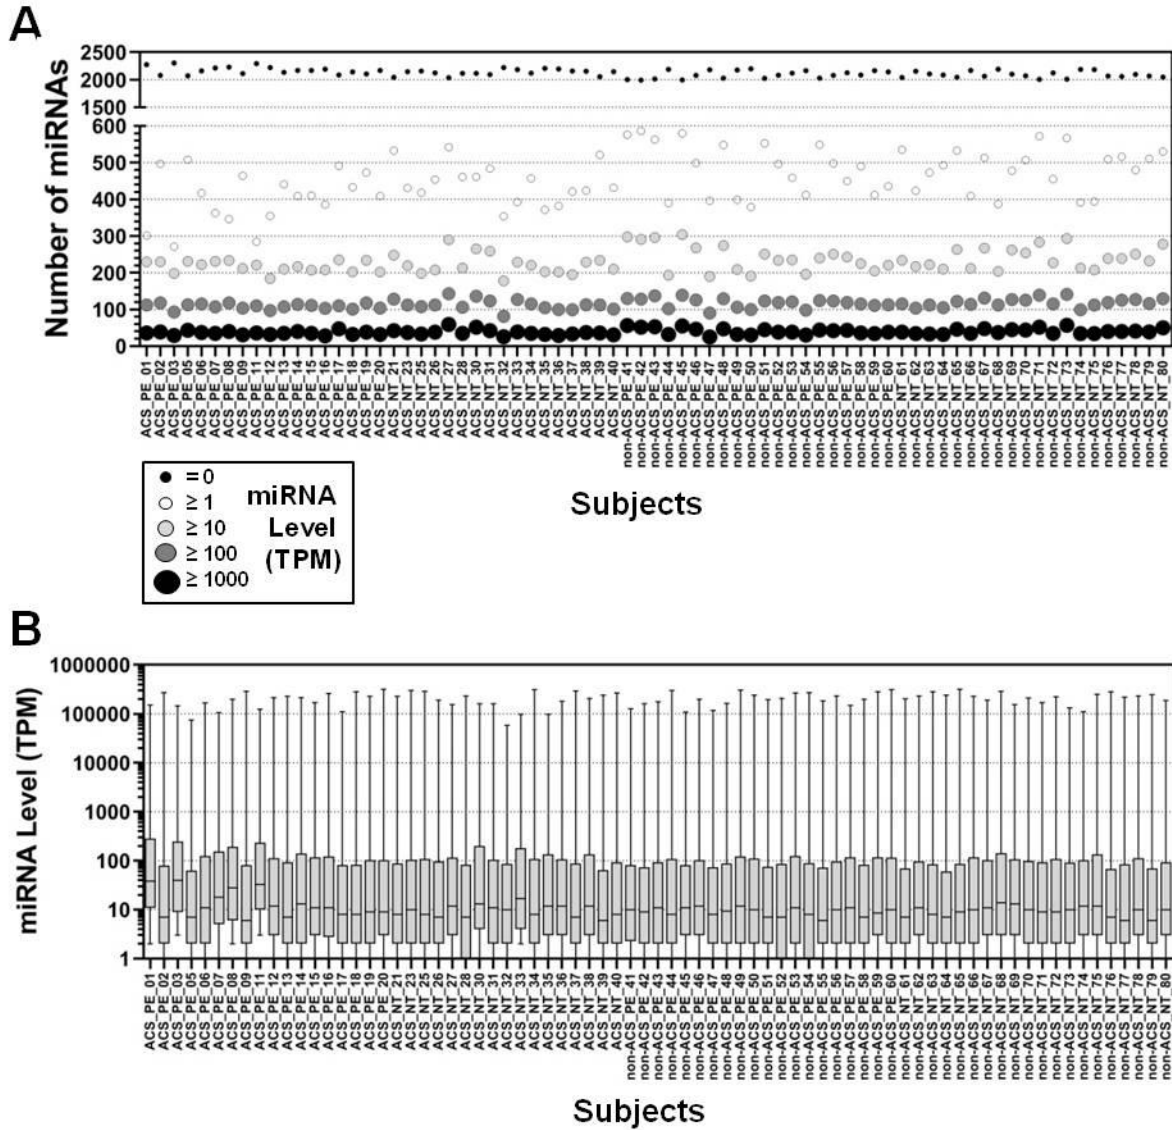

**Figure S3. Distribution of plasma miRNA levels per subject identified by RNA-sequencing.** (A) Number of miRNAs identified per subject per miRNA level. MiRNA levels are expressed as Tags Per Million mapped reads (TPM), which normalizes for differences in miRNA length and sequencing depth. (B) Distribution of miRNA levels per subject. Boxplots show median and interquartile range, and whiskers denote min-max range. MiRNAs with 0 TPM were excluded from the graph. Each subject is denoted by the cohort (i.e., ACS or non-ACS), prior preeclampsia (PE) or normotensive pregnancy (NT) exposure, and a unique numerical identifier.

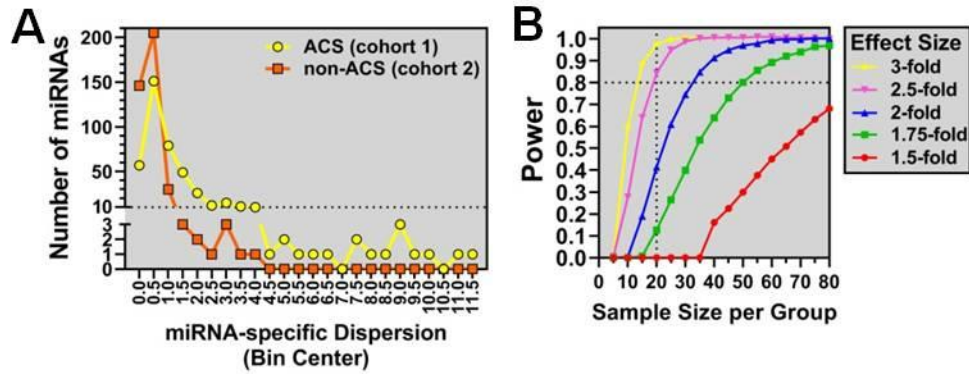

**Figure S4. Dispersion of miRNA levels and related power curves.** (A) Histogram showing number of miRNAs as a function of their level of dispersion across subjects (bin width = 0.5). miRNA-specific dispersion values were calculated from TMM-normalized counts for 427 miRs in ACS cohort 1 (n=17-18 subjects/exposure group) and 392 miRs in non-ACS cohort 2 (n=20 subjects/exposure group) using the R program RNASeqSampleSize. (B) Power curves showing the relationship between statistical power and sample size per group for varying effect sizes (i.e., magnitude of fold-change in miRNA level). Statistical power was estimated by RNASeqSampleSize for a hypothetical scenario assuming 400 assessed miRs, 25 differentially altered miRNAs at FDR<0.05, an average read count of 30 and dispersion level of 0.5.

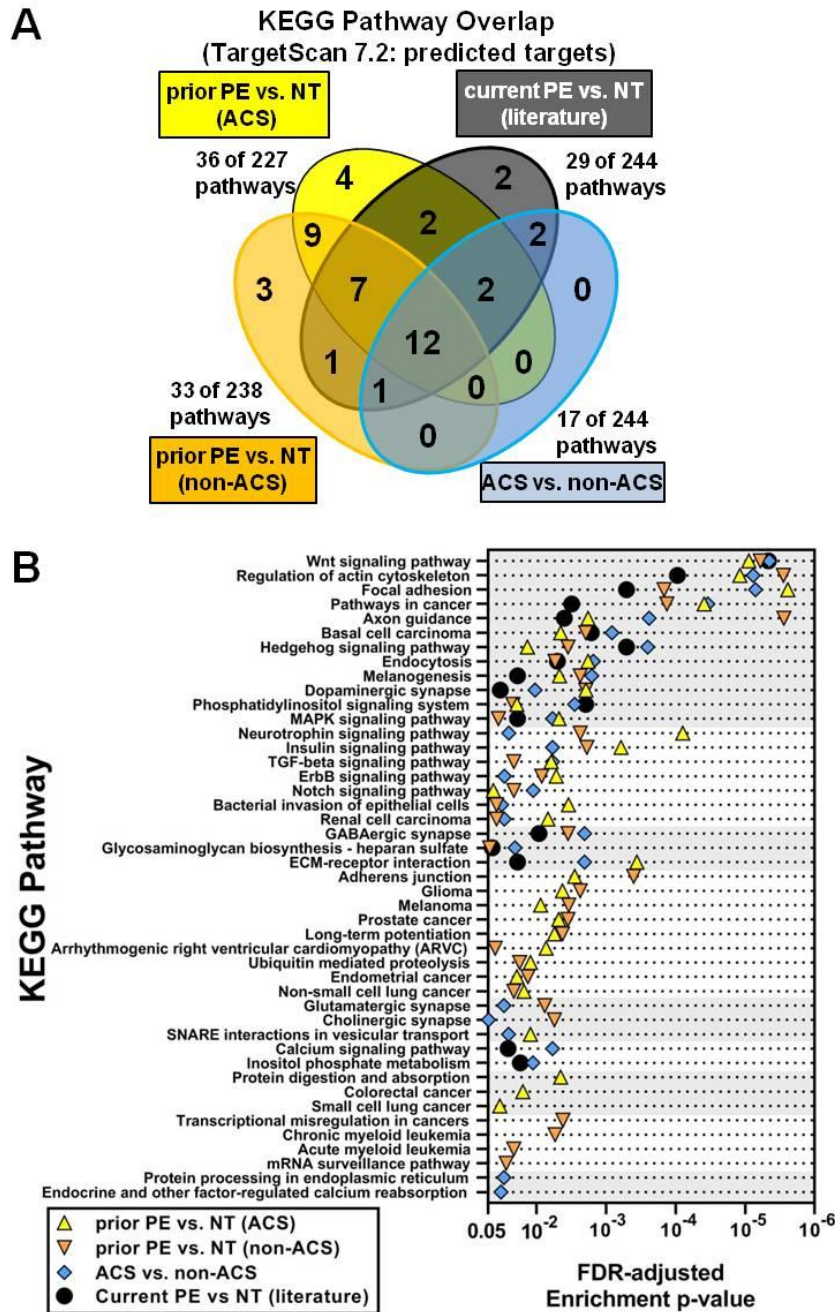

**Figure S5. Integration of predicted gene targets and pathway enrichment analysis.** Gene target integration was performed with 30 miRs ( $p < 0.05$ ), 20 miRs ( $p < 0.05$ ), 259 miRs ( $FDR < 0.05$ ) and 104 miRs ( $p < 0.05$ ) for cohort 1 (prior PE vs. NT exposure; ACS subjects), cohort 2 (prior PE vs. NT exposure; non-ACS subjects), cohort 3 (ACS vs. non-ACS exposure) and cohort 4 (current PE vs. NT exposure, curated from prior literature). **(A)** Venn diagram shows the number of KEGG pathways significantly enriched ( $FDR < 0.05$ ) with the predicted gene targets of the altered miRNA candidates (via Targetscan 7.2), and the level of overlap between different exposure groups. **(B)** Identity of specific KEGG pathways from panel A and associated false discovery rate-adjusted enrichment p-values for each exposure group.

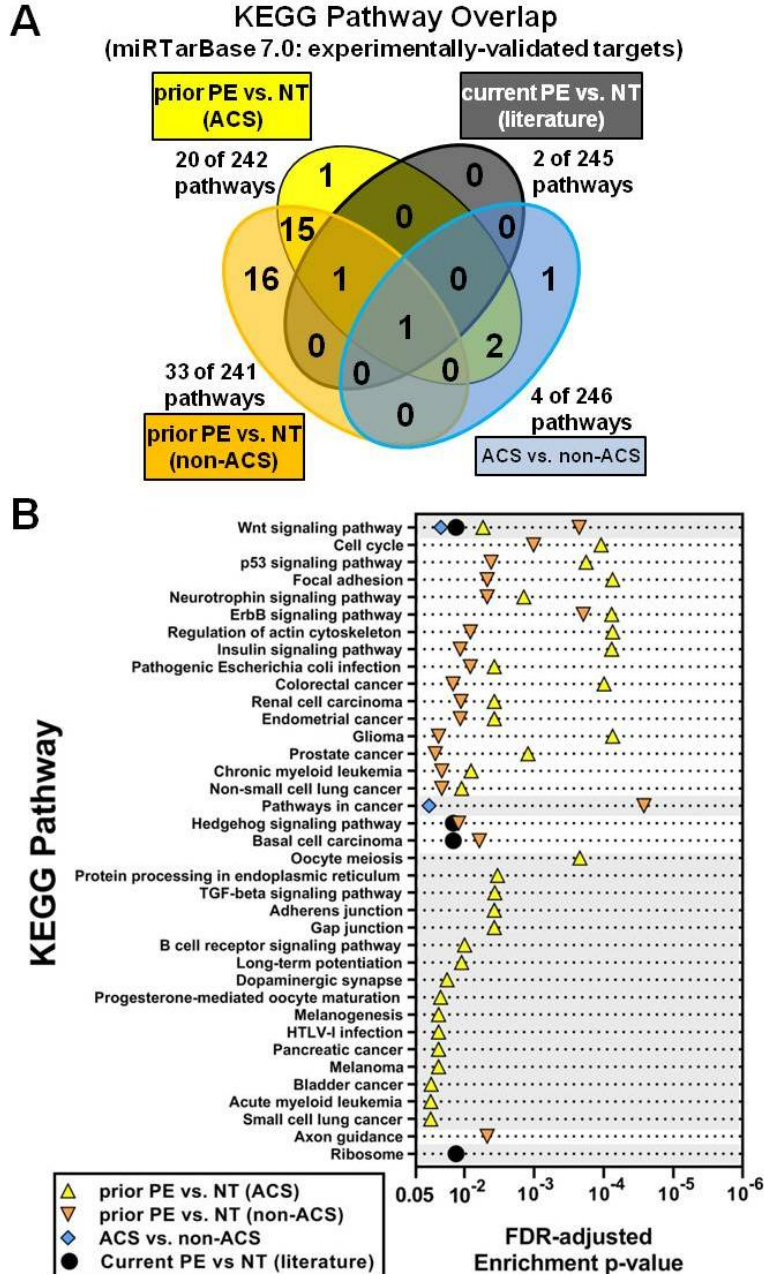

**Figure S6. Integration of experimentally-validated gene targets and pathway enrichment analysis.** Gene target integration was performed with 30 miRs ( $p < 0.05$ ), 20 miRs ( $p < 0.05$ ), 259 miRs ( $FDR < 0.05$ ) and 104 miRs ( $p < 0.05$ ) for cohort 1 (prior PE vs. NT exposure; ACS subjects), cohort 2 (prior PE vs. NT exposure; non-ACS subjects), cohort 3 (ACS vs. non-ACS exposure) and cohort 4 (current PE vs. NT exposure, curated from prior literature). (A) Venn diagram shows the number of KEGG biological pathways significantly enriched ( $FDR < 0.05$ ) with experimentally-validated targets of the altered miRNA candidates (via miRTarBase 7.0 database), and the overlap between different exposure groups. (B) Identity of specific KEGG pathways from panel A, and associated false discovery rate-adjusted enrichment p-values for each exposure group.

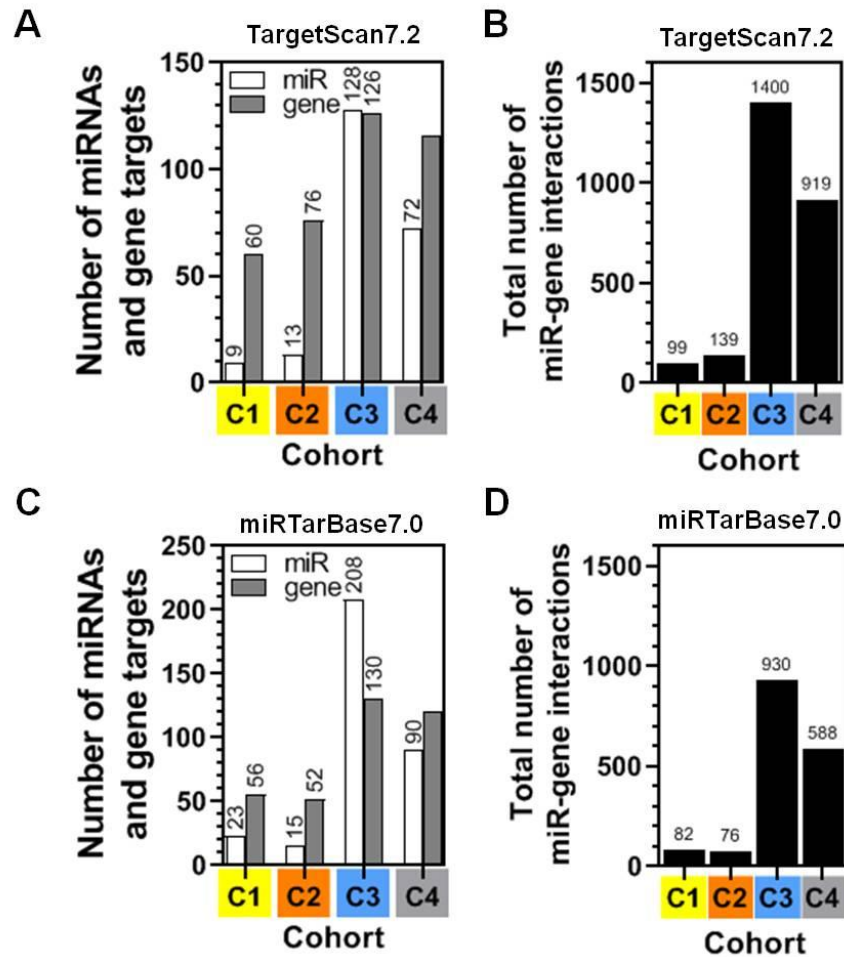

**Figure S7. Characterization of miRNA-gene target interactions related to Wnt signaling in subjects with prior PE, current ACS or current PE.** (A) Number of miRNAs and predicted gene targets identified in each cohort by Targetscan 7.2. (B) Total number of predicted miRNA-gene target interactions identified in each cohort by Targetscan7.2. (C) Number of miRNAs and experimentally-validated gene targets identified in each cohort by miRTarBase7.0. (D) Total number of experimentally-validated miRNA-gene target interactions identified in each cohort by miRTarBase. Cohort 1 (C1: prior PE vs. NT exposure; ACS subjects), cohort 2 (C2: prior PE vs. NT exposure; non-ACS subjects), cohort 3 (C3: ACS vs. non-ACS exposure) and cohort 4 (C4: current PE vs. NT exposure, curated from prior literature).



## Supplementary References

1. Pilote L, Karp I. GENESIS-PRAXY (GENdEr and Sex determInantS of cardiovascular disease: From bench to beyond-Premature Acute Coronary SYndrome). *Am Heart J* 2012; 163 (5):741-746 e742.
2. Smith BH, Campbell A, Linksted P, Fitzpatrick B, Jackson C, Kerr SM, et al. Cohort Profile: Generation Scotland: Scottish Family Health Study (GS:SFHS). The study, its participants and their potential for genetic research on health and illness. *Int J Epidemiol* 2013; 42 (3):689-700.
3. Carty DM, Siwy J, Brennand JE, Zurbig P, Mullen W, Franke J, et al. Urinary proteomics for prediction of preeclampsia. *Hypertension* 2011; 57 (3):561-569.
4. Sheikh AM, Small HY, Currie G, Delles C. Systematic Review of Micro-RNA Expression in Pre-Eclampsia Identifies a Number of Common Pathways Associated with the Disease. *PLoS One* 2016; 11 (8):e0160808.
5. Agarwal V, Bell GW, Nam JW, Bartel DP. Predicting effective microRNA target sites in mammalian mRNAs. *Elife* 2015; 4.
6. Chou CH, Shrestha S, Yang CD, Chang NW, Lin YL, Liao KW, et al. miRTarBase update 2018: a resource for experimentally validated microRNA-target interactions. *Nucleic Acids Res* 2018; 46 (D1):D296-D302.
7. Dayan N, Schlosser K, Stewart DJ, Delles C, Kaur A, Pilote L. Circulating MicroRNAs Implicate Multiple Atherogenic Abnormalities in the Long-Term Cardiovascular Sequelae of Preeclampsia. *Am J Hypertens* 2018; 31 (10):1093-1097.
8. Zhao S, Li CI, Guo Y, Sheng Q, Shyr Y. RnaSeqSampleSize: real data based sample size estimation for RNA sequencing. *BMC Bioinformatics* 2018; 19 (1):191.
9. Li H, Ge Q, Guo L, Lu Z. Maternal plasma miRNAs expression in preeclamptic pregnancies. *Biomed Res Int* 2013; 2013:970265.
10. Yang Q, Lu J, Wang S, Li H, Ge Q, Lu Z. Application of next-generation sequencing technology to profile the circulating microRNAs in the serum of preeclampsia versus normal pregnant women. *Clin Chim Acta* 2011; 412 (23-24):2167-2173.
11. Yang S, Li H, Ge Q, Guo L, Chen F. Deregulated microRNA species in the plasma and placenta of patients with preeclampsia. *Mol Med Rep* 2015; 12 (1):527-534.
12. Ura B, Feriotto G, Monasta L, Bilel S, Zweyer M, Celeghini C. Potential role of circulating microRNAs as early markers of preeclampsia. *Taiwan J Obstet Gynecol* 2014; 53 (2):232-234.
13. Wu L, Zhou H, Lin H, Qi J, Zhu C, Gao Z, et al. Circulating microRNAs are elevated in plasma from severe preeclamptic pregnancies. *Reproduction* 2012; 143 (3):389-397.
14. Akehurst C, Small HY, Sharafetdinova L, Forrest R, Beattie W, Brown CE, et al. Differential expression of microRNA-206 and its target genes in preeclampsia. *J Hypertens* 2015; 33 (10):2068-2074.
